# Supplementary material for: Electrophotocatalytic Undirected C−H Trifluoromethylations of (Het)Arenes
Source: PubMed Central journal article supplement (PMC7155051; doi:10.1002/chem.201905774), 2020-02-19

# CHEMISTRY

## A **European** Journal

### Supporting Information

#### **Electrophotocatalytic Undirected C–H Trifluoromethylations of (Het)Arenes**

Youai Qiu, Alexej Scheremetjew, Lars H. Finger, and Lutz Ackermann\*<sup>[a]</sup>

chem\_201905774\_sm\_miscellaneous\_information.pdf

## Table of Contents

|                                                                                             |      |
|---------------------------------------------------------------------------------------------|------|
| General Remarks                                                                             | S-2  |
| Optimization of the Electrophotochemical C–H Trifluoromethylation                           | S-3  |
| General Procedure for the Electrophotochemical C–H Trifluoromethylation                     | S-5  |
| Characterization Data of Products                                                           | S-6  |
| General Procedure for the Electrophotochemical C–H Trifluoromethylation in Flow             | S-21 |
| On-Line NMR Monitoring in Flow                                                              | S-23 |
| Radical Trap Experiments                                                                    | S-26 |
| Light on/off Experiments                                                                    | S-29 |
| Electricity on/off Experiments                                                              | S-30 |
| Estimation of Quantum Yield                                                                 | S-31 |
| Fluorescence Quenching Experiments                                                          | S-33 |
| GC-Headspace Detection                                                                      | S-36 |
| Cyclic Voltammetry                                                                          | S-37 |
| Plausible Mechanism with [Ru(bpy) <sub>3</sub> ](PF <sub>6</sub> ) <sub>2</sub> as Catalyst | S-40 |
| References                                                                                  | S-41 |
| NMR-Spectra                                                                                 | S-42 |

## General Remarks

Catalytic reactions were carried out in undivided electrochemical cells (10 mL) using pre-dried glassware, if not noted otherwise. Substrates,  $\text{CF}_3\text{SO}_2\text{Na}$  and solvents were obtained from commercial sources. Platinum electrodes (10 mm  $\times$  15 mm  $\times$  0.25 mm, 99.9%; obtained from ChemPur<sup>®</sup> Karlsruhe, Germany) and graphite felt electrodes (10 mm  $\times$  15 mm  $\times$  6 mm, SIGRACELL<sup>®</sup> GFA 6 EA, obtained from SGL Carbon, Wiesbaden, Germany) were connected using stainless steel adapters. Electrocatalysis was conducted using an AXIOMET AX-3003P potentiostat in constant current mode. For reactions in flow an Ismatec REGLO Digital MS-2/12 (ISM 596) peristaltic pump was employed. The  $^{19}\text{F}$  and  $^1\text{H}$  NMR spectroscopy experiments in flow were performed on a Magritek Spinsolve 60<sup>ULTRA</sup> (from Magritek GmbH, Germany). Cyclic Voltammetry studies were performed using a Metrohm Autolab PGSTAT204 workstation and Nova 2.1 software. Yields refer to isolated compounds, estimated to be >95% pure as determined by  $^1\text{H}$ -NMR. Chromatography was carried out on Merck silica gel 60 (40–63  $\mu\text{m}$ ). NMR spectra were recorded on a Varian Mercury VX 300, Inova 500 or Bruker Avance III 300, Avance III 400 and Avance III HD 500 in the solvent indicated; chemical shifts ( $\delta$ ) are given in ppm relative to the residual solvent peak. All IR spectra were recorded on a Bruker FT-IR Alpha-P device. EI-MS was recorded on Jeol AccuTOF at 70eV, ESI-MS on Bruker MicrOTOF and maXis. GC-MS was recorded on Agilent 7890B and Agilent 5977B. M. p.: Stuart melting point apparatus SMP3, Barloworld Scientific, values are uncorrected. Headspace analysis of the reaction mixture was performed on a Shimadzu S2014 GC System using a Thermal Conductivity Detector and a 5Å MS column.

## Optimization of the Electrophotochemical C–H Trifluoromethylation

**Table S-1:** Optimization of the electrophotochemical C–H trifluoromethylation.<sup>a</sup>

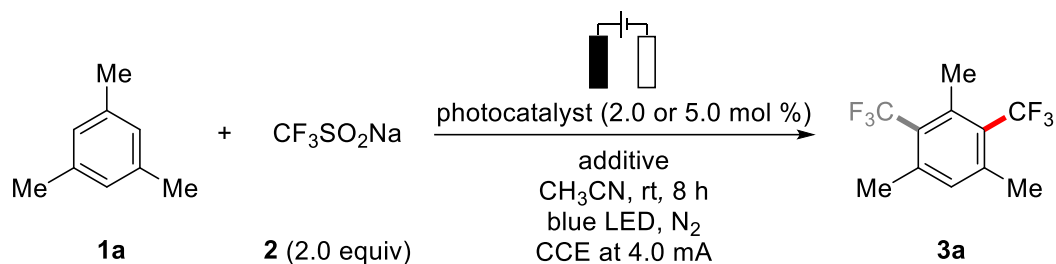

| Entry           | Photocatalyst                                             | Additive           | Solvent            | Yield (%) <sup>b</sup> | Ratio (%) <sup>b</sup> |
|-----------------|-----------------------------------------------------------|--------------------|--------------------|------------------------|------------------------|
| 1               | [Mes-Acr <sup>+</sup> ]ClO <sub>4</sub> <sup>-</sup>      | KOAc               | CH <sub>3</sub> CN | 48                     | 93/7                   |
| 2               | [Mes-Acr <sup>+</sup> ]ClO <sub>4</sub> <sup>-</sup>      | TBAPF <sub>6</sub> | CH <sub>3</sub> CN | 10                     | -                      |
| 3               | [Mes-Acr <sup>+</sup> ]ClO <sub>4</sub> <sup>-</sup>      | LiClO <sub>4</sub> | CH <sub>3</sub> CN | 85                     | 93/7                   |
| 4               | [Mes-Acr <sup>+</sup> ]ClO <sub>4</sub> <sup>-</sup>      | LiClO <sub>4</sub> | DCE                | 38                     | 94/6                   |
| 5               | [Mes-Acr <sup>+</sup> ]ClO <sub>4</sub> <sup>-</sup>      | LiClO <sub>4</sub> | TFE                | 45                     | 80/20                  |
| 6               | [Mes-Acr <sup>+</sup> ]ClO <sub>4</sub> <sup>-</sup>      | LiClO <sub>4</sub> | HFIP               | 68                     | 62/38                  |
| 7               | [Ru(bpy) <sub>3</sub> ](PF <sub>6</sub> ) <sub>2</sub>    | LiClO <sub>4</sub> | CH <sub>3</sub> CN | 88                     | 78/22                  |
| 8               | Eosin Y                                                   | LiClO <sub>4</sub> | CH <sub>3</sub> CN | 75                     | 83/17                  |
| 9 <sup>c</sup>  | [Mes-Acr <sup>+</sup> ]ClO <sub>4</sub> <sup>-</sup>      | LiClO <sub>4</sub> | CH <sub>3</sub> CN | 5                      | -                      |
| 10 <sup>d</sup> | [Mes-Acr <sup>+</sup> ]ClO <sub>4</sub> <sup>-</sup>      | LiClO <sub>4</sub> | CH <sub>3</sub> CN | 8                      | -                      |
| 11 <sup>c</sup> | [Ru(bpy) <sub>3</sub> ](PF <sub>6</sub> ) <sub>2</sub>    | LiClO <sub>4</sub> | CH <sub>3</sub> CN | trace                  | -                      |
| 12 <sup>d</sup> | [Ru(bpy) <sub>3</sub> ](PF <sub>6</sub> ) <sub>2</sub>    | LiClO <sub>4</sub> | CH <sub>3</sub> CN | 7                      | -                      |
| 13 <sup>e</sup> | [Mes-Acr <sup>+</sup> ]ClO <sub>4</sub> <sup>-</sup>      | LiClO <sub>4</sub> | CH <sub>3</sub> CN | 4                      | -                      |
| 14 <sup>e</sup> | [Ru(bpy) <sub>3</sub> ](PF <sub>6</sub> ) <sub>2</sub>    | LiClO <sub>4</sub> | CH <sub>3</sub> CN | 3                      | -                      |
| 15              | -                                                         | LiClO <sub>4</sub> | CH <sub>3</sub> CN | 9                      | -                      |
| 16              | [Mes-Acr <sup>+</sup> ]ClO <sub>4</sub> <sup>-</sup>      | -                  | CH <sub>3</sub> CN | 55                     | 92/8                   |
| 17 <sup>f</sup> | [Mes-Acr <sup>+</sup> ]ClO <sub>4</sub> <sup>-</sup>      | LiClO <sub>4</sub> | CH <sub>3</sub> CN | 70                     | 92/8                   |
| 18 <sup>g</sup> | [Mes-Acr <sup>+</sup> ]ClO <sub>4</sub> <sup>-</sup>      | LiClO <sub>4</sub> | CH <sub>3</sub> CN | 23                     |                        |
| 19              | [Mes-Acr <sup>+</sup> ]ClO <sub>4</sub> <sup>-</sup>      | -                  | CH <sub>3</sub> CN | 55                     | 92/8                   |
| 10              | [Ru(bpy) <sub>3</sub> ](PF <sub>6</sub> ) <sub>2</sub>    | -                  | CH <sub>3</sub> CN | 60                     | 80/20                  |
| 21              | [Ru(bpy) <sub>3</sub> ]Cl <sub>2</sub> ·6H <sub>2</sub> O | -                  | CH <sub>3</sub> CN | 10                     | -                      |
| 22 <sup>h</sup> | [Ru(bpy) <sub>3</sub> ](PF <sub>6</sub> ) <sub>2</sub>    | LiClO <sub>4</sub> | CH <sub>3</sub> CN | 75                     | 86/14                  |
| 23 <sup>i</sup> | [Mes-Acr <sup>+</sup> ]ClO <sub>4</sub> <sup>-</sup>      | LiClO <sub>4</sub> | CH <sub>3</sub> CN | 52                     | 87/13                  |

[a] Undivided cell, graphite felt (GF) anode, Pt cathode, constant current = 4.0 mA, **1** (0.25 mmol), **2** (0.50 mmol), photocatalyst (2.0 or 5.0 mol %), additive (0.1 M), solvent (4.0 mL), 23 °C, blue LED, under N<sub>2</sub>, 8 h. [b] Yields determined by <sup>1</sup>H NMR with CH<sub>2</sub>Br<sub>2</sub> as internal standard, and ratio is mono-/bis- CF<sub>3</sub> substituents. [c] Without electricity under N<sub>2</sub> after degassing. [d] Without blue light. [e] Without electricity in air. [f] Additive: H<sub>2</sub>O (2.0 equiv). [g] Additive: TFA (2.0 equiv). [h] **2** (1.5 equiv). [i] Nickel foam as cathode. Standard condition A: [Mes-Acr<sup>+</sup>]ClO<sub>4</sub><sup>-</sup> (5.0 mol %) as catalyst (Faradaic yield: 36%); standard condition B: [Ru(bpy)<sub>3</sub>](PF<sub>6</sub>)<sub>2</sub> (2.0 mol %) as catalyst (Faradaic yield: 37%).

**Figure S-1.** Set-up of experiments

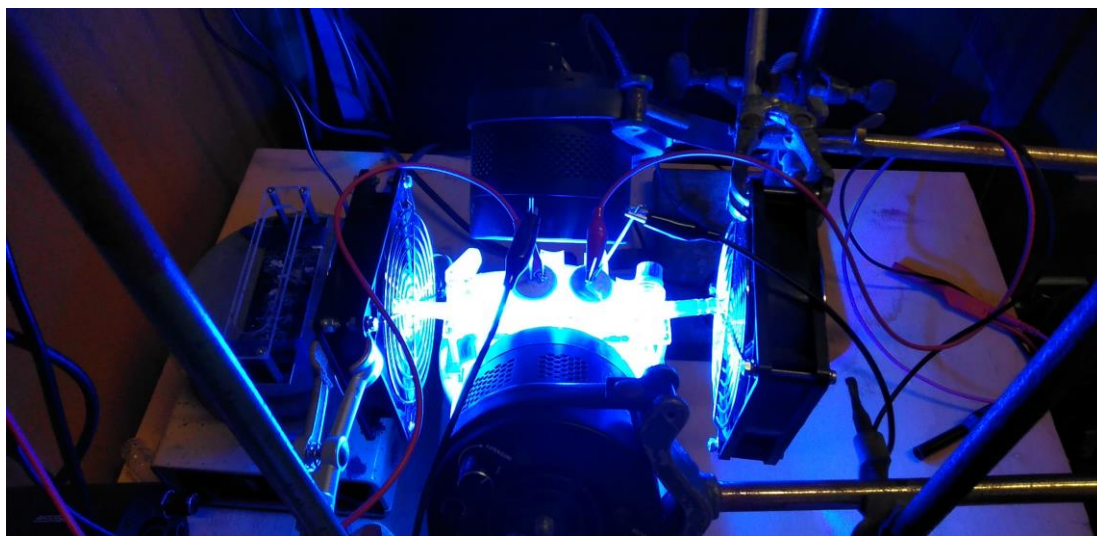

### **General Procedure A for the Electrophotocatalytic C–H Trifluoromethylation**

The electrophotocatalysis was carried out in an undivided cell with a GF anode (10 mm × 15 mm × 6 mm) and a Pt cathode (10 mm × 15 mm × 0.25 mm). Substrate **1** or **4** (0.25 mmol, 1.0 equiv), CF<sub>3</sub>SO<sub>2</sub>Na **2** (78 mg, 0.50 mmol, 2.0 equiv), LiClO<sub>4</sub> (42 mg, 0.40 mmol) and [Mes-Acr<sup>+</sup>]<sup>+</sup>ClO<sub>4</sub><sup>-</sup> (5.1 mg, 5.0 mol %) were dissolved in CH<sub>3</sub>CN (4.0 mL) under N<sub>2</sub>. The electrophotocatalysis was performed at 23 °C with a constant current of 4.0 mA maintained for 8-16 h under visible light irradiation (2 × Kessil A360N lamp). The GF anode was washed with CH<sub>2</sub>Cl<sub>2</sub> (3 × 10 mL) in an ultrasonic bath. Evaporation of the solvent and subsequent column chromatography on silica gel afforded the corresponding products.

### **General Procedure B for the Electrophotocatalytic C–H Trifluoromethylation**

The electrophotocatalysis was carried out in an undivided cell with a GF anode (10 mm × 15 mm × 6 mm) and a Pt cathode (10 mm × 15 mm × 0.25 mm). Substrate **1** or **4** (0.25 mmol, 1.0 equiv), CF<sub>3</sub>SO<sub>2</sub>Na **2** (78 mg, 0.50 mmol, 2.0 equiv), LiClO<sub>4</sub> (42 mg, 0.40 mmol) and [Ru(bpy)<sub>3</sub>](PF<sub>6</sub>)<sub>2</sub> (4.3 mg, 2.0 mol %) were dissolved in CH<sub>3</sub>CN (4.0 mL) under N<sub>2</sub>. The electrophotocatalysis was performed at 23 °C with a constant current of 4.0 mA maintained for 8-16 h under visible light irradiation (2 × Kessil A360N). The GF anode was washed with CH<sub>2</sub>Cl<sub>2</sub> (3 × 10 mL) in an ultrasonic bath. Evaporation of the solvent and subsequent column chromatography on silica gel afforded the corresponding products.

## Characterization Data of Products.

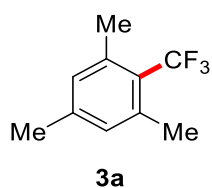

### 1,3,5-Trimethyl-2-(trifluoromethyl)benzene (**3a**)

The general procedure A was followed using **1a** (30 mg, 0.25 mmol) at 23 °C for 8 h. Purification by column chromatography on silica gel (pentane) yielded **3a** (37 mg, 79%) as a colorless oil.  $^1\text{H-NMR}$  (400 MHz,  $\text{CDCl}_3$ ):  $\delta$  = 6.88 (s, 2H), 2.44–2.40 (m, 6H), 2.27 (s, 3H).  $^{13}\text{C-NMR}$  (100 MHz,  $\text{CDCl}_3$ ):  $\delta$  = 140.8 ( $\text{C}_q$ ), 137.3 (q,  $^3J_{\text{C-F}} = 2.2$  Hz,  $\text{C}_q$ ), 130.8 (CH), 126.2 (q,  $^1J_{\text{C-F}} = 275.8$  Hz,  $\text{C}_q$ ), 124.8 (q,  $^2J_{\text{C-F}} = 28.0$  Hz,  $\text{C}_q$ ), 21.31 (q,  $^4J_{\text{C-F}} = 4.1$  Hz,  $\text{CH}_3$ ), 20.9 ( $\text{CH}_3$ ).  $^{19}\text{F-NMR}$  (376 MHz,  $\text{CDCl}_3$ ):  $\delta$  = -53.7 (s). IR (ATR): 2925, 2854, 1459, 1379, 1294, 1152, 1115  $\text{cm}^{-1}$ . MS (EI)  $m/z$  (relative intensity): 188 (100)  $[\text{M}]^+$ . HR-MS (EI)  $m/z$  calc. for  $\text{C}_{10}\text{H}_{11}\text{F}_3$   $[\text{M}]^+$ : 188.0807, found: 188.0815. The analytical data correspond with those reported in the literature.<sup>[1]</sup>

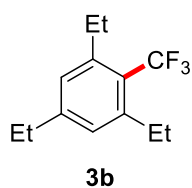

### 1,3,5-Triethyl-2-(trifluoromethyl)benzene (**3b**)

The general procedure A was followed using **1b** (41 mg, 0.25 mmol) at 23 °C for 16 h. Purification by column chromatography on silica gel (pentane) yielded **3b** (38 mg, 65%) as a colorless oil.  $^1\text{H-NMR}$  (300 MHz,  $\text{CDCl}_3$ ):  $\delta$  = 6.99 (s, 2H), 2.88–2.76 (m, 4H), 2.65 (q,  $J = 7.6$  Hz, 2H), 1.27 (t,  $J = 7.6$  Hz, 3H), 1.26 (t,  $J = 7.4$  Hz, 6H).  $^{13}\text{C-NMR}$  (100 MHz,  $\text{CDCl}_3$ ):  $\delta$  = 147.3 ( $\text{C}_q$ ), 143.9 (q,  $^3J_{\text{C-F}} = 1.9$  Hz,  $\text{C}_q$ ), 128.5 (CH), 126.2 (q,  $^1J_{\text{C-F}} = 276.2$  Hz,  $\text{C}_q$ ), 123.7 (q,  $^2J_{\text{C-F}} = 28.4$  Hz,  $\text{C}_q$ ), 28.4 ( $\text{CH}_2$ ), 27.9 (q,  $^4J_{\text{C-F}} = 3.8$  Hz,  $\text{CH}_2$ ), 16.6 (q,  $^5J_{\text{C-F}} = 1.6$  Hz,  $\text{CH}_3$ ), 15.1 ( $\text{CH}_3$ ).  $^{19}\text{F-NMR}$  (282 MHz,  $\text{CDCl}_3$ ):  $\delta$  = -52.3 (s). IR (ATR): 2968, 2936, 2880, 1609, 1575, 1458, 1294, 1143, 1106, 1037  $\text{cm}^{-1}$ . MS (EI)  $m/z$  (relative intensity): 230 (30)  $[\text{M}]^+$ , 215 (100)  $[\text{M}-\text{CH}_3]^+$ . HR-MS (EI)  $m/z$  calc. for  $\text{C}_{13}\text{H}_{17}\text{F}_3$   $[\text{M}]^+$ : 230.1277, found: 230.1279.

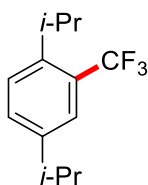

**3c**

#### 1,4-Diisopropyl-2-(trifluoromethyl)benzene (**3c**)

The general procedure B was followed using **1c** (41 mg, 0.25 mmol) at 23 °C for 16 h. Purification by column chromatography on silica gel (pentane) yielded **3c** (39 mg, 67%) as a colorless oil. <sup>1</sup>H-NMR (400 MHz, CDCl<sub>3</sub>): δ = 7.42–7.39 (m, 1H), 7.37 (d, *J* = 8.2 Hz, 1H), 7.35–7.31 (m, 1H), 3.37–3.23 (m, 1H), 2.90 (hept, *J* = 7.0 Hz, 1H), 1.23 (d, *J* = 7.0 Hz, 6H), 1.23 (d, *J* = 6.8 Hz, 6H). <sup>13</sup>C-NMR (100 MHz, CDCl<sub>3</sub>): δ = 146.2 (C<sub>q</sub>), 145.3 (q, <sup>3</sup>*J*<sub>C-F</sub> = 1.4 Hz, C<sub>q</sub>), 130.0 (CH), 127.2 (CH), 127.1 (q, <sup>2</sup>*J*<sub>C-F</sub> = 28.4 Hz, C<sub>q</sub>), 124.8 (q, <sup>1</sup>*J*<sub>C-F</sub> = 272.3 Hz, C<sub>q</sub>), 123.5 (q, <sup>3</sup>*J*<sub>C-F</sub> = 5.9 Hz, CH), 33.6 (CH), 28.9 (q, <sup>4</sup>*J*<sub>C-F</sub> = 1.8 Hz, CH), 24.3 (CH<sub>3</sub>), 23.8 (CH<sub>3</sub>). <sup>19</sup>F-NMR (376 MHz, CDCl<sub>3</sub>): δ = -58.9 (s). IR (ATR): 2960, 2926, 1462, 1315, 1148, 1122, 1054 cm<sup>-1</sup>. MS (EI) *m/z* (relative intensity): 230 (30) [M]<sup>+</sup>, 215 (100) [M-CH<sub>3</sub>]<sup>+</sup>. HR-MS (EI) *m/z* calc. for C<sub>13</sub>H<sub>17</sub>F<sub>3</sub> [M]<sup>+</sup>: 230.1277, found: 230.1282.

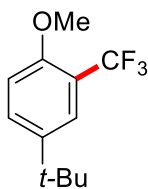

**3d**

#### 4-(*tert*-Butyl)-1-methoxy-2-(trifluoromethyl)benzene (**3d**)

The general procedure B was followed using **1d** (41 mg, 0.25 mmol) at 23 °C for 8 h. Purification by column chromatography on silica gel (*n*-hexane) yielded **3d** (41 mg, 71%) as a colorless oil. <sup>1</sup>H-NMR (500 MHz, CDCl<sub>3</sub>): δ = 7.57–7.52 (m, 1H), 7.51–7.44 (m, 1H), 6.92 (d, *J* = 8.6 Hz, 1H), 3.87 (s, 3H), 1.29 (s, 9H). <sup>13</sup>C-NMR (125 MHz, CDCl<sub>3</sub>): δ = 155.2 (q, <sup>3</sup>*J*<sub>C-F</sub> = 1.6 Hz, C<sub>q</sub>), 142.9 (C<sub>q</sub>), 129.9 (CH), 123.9 (q, <sup>3</sup>*J*<sub>C-F</sub> = 5.3 Hz, CH), 123.9 (q, <sup>1</sup>*J*<sub>C-F</sub> = 272.4 Hz, C<sub>q</sub>), 118.0 (q, <sup>2</sup>*J*<sub>C-F</sub> = 30.2 Hz, C<sub>q</sub>), 111.7 (CH), 56.0 (CH<sub>3</sub>), 34.2 (C<sub>q</sub>), 31.3 (CH<sub>3</sub>). <sup>19</sup>F-NMR (470 MHz, CDCl<sub>3</sub>): δ = -62.1 (s). IR (ATR): 2963, 2910, 1620, 1509, 1325, 1281, 1254, 1127, 1058, 1028 cm<sup>-1</sup>. MS (EI) *m/z* (relative intensity): 232 (30) [M]<sup>+</sup>, 217 (100) [M-CH<sub>3</sub>]<sup>+</sup>. HR-MS (EI) *m/z* calc. for C<sub>12</sub>H<sub>15</sub>F<sub>3</sub>O [M]<sup>+</sup>: 232.1070, found: 232.1069. The analytical data correspond with those reported in the literature.<sup>[1]</sup>



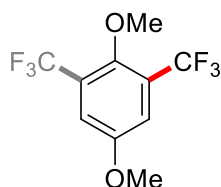

**3e** (mono/bis = 3/1)

### 1,4-Dimethoxy-2-(trifluoromethyl)benzene (**3e**)

The mono/bis ratio was determined to be 3:1 by  $^1\text{H-NMR}$  analysis of the crude reaction mixture. The general procedure B was followed using **1e** (35 mg, 0.25 mmol) at 23 °C for 16 h. Purification by column chromatography on silica gel (*n*-hexane/EtOAc = 50:1) yielded **3e** (33 mg, 63%) as a colorless oil.  $^1\text{H-NMR}$  (300 MHz,  $\text{CDCl}_3$ ):  $\delta$  = 7.17–7.11 (m, 1H), 7.08–7.01 (m, 1H), 6.97 (d,  $J$  = 9.0 Hz, 1H), 3.88 (s, 3H), 3.82 (s, 3H).  $^{13}\text{C-NMR}$  (100 MHz,  $\text{CDCl}_3$ ):  $\delta$  = 152.9 ( $\text{C}_q$ ), 151.6 (q,  $^3J_{\text{C-F}}$  = 1.7 Hz,  $\text{C}_q$ ), 123.4 (q,  $^1J_{\text{C-F}}$  = 272.5 Hz,  $\text{C}_q$ ), 119.4 (q,  $^2J_{\text{C-F}}$  = 31.0 Hz,  $\text{C}_q$ ), 118.1 (CH), 113.6 (CH), 112.8 (q,  $^3J_{\text{C-F}}$  = 5.4 Hz, CH), 56.6 ( $\text{CH}_3$ ), 55.9 ( $\text{CH}_3$ ).  $^{19}\text{F-NMR}$  (470 MHz,  $\text{CDCl}_3$ ):  $\delta$  = -62.4 (s). IR (ATR): 2954, 2921, 1504, 1415, 1306, 1122, 1043  $\text{cm}^{-1}$ . MS (EI)  $m/z$  (relative intensity): 206 (90)  $[\text{M}]^+$ , 191 (100)  $[\text{M-CH}_3]^+$ . HR-MS (EI)  $m/z$  calc. for  $\text{C}_9\text{H}_9\text{F}_3\text{O}_2$   $[\text{M}]^+$ : 206.0549, found: 206.0552. The analytical data correspond with those reported in the literature.<sup>[2]</sup>

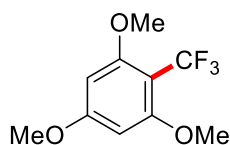

**3f**

### 1,3,5-Trimethoxy-2-(trifluoromethyl)benzene (**3f**)

The general procedure A was followed using **1f** (42 mg, 0.25 mmol) at 23 °C for 8 h. Purification by column chromatography on silica gel (*n*-hexane/EtOAc = 10:1) yielded **3f** (43 mg, 73%) as a white solid. M. p.: 64–65 °C.  $^1\text{H-NMR}$  (400 MHz,  $\text{CDCl}_3$ ):  $\delta$  = 6.11 (s, 2H), 3.82 (s, 6H), 3.82 (s, 3H).  $^{13}\text{C-NMR}$  (100 MHz,  $\text{CDCl}_3$ ):  $\delta$  = 163.5 ( $\text{C}_q$ ), 160.4 (q,  $^3J_{\text{C-F}}$  = 1.4 Hz,  $\text{C}_q$ ), 124.3 (q,  $^1J_{\text{C-F}}$  = 273.3 Hz,  $\text{C}_q$ ), 100.4 (q,  $^2J_{\text{C-F}}$  = 30.2 Hz,  $\text{C}_q$ ), 91.2 (CH), 56.2 ( $\text{CH}_3$ ), 55.4 ( $\text{CH}_3$ ).  $^{19}\text{F-NMR}$  (376 MHz,  $\text{CDCl}_3$ ):  $\delta$  = -54.2 (s). IR (ATR): 2951, 2920, 1594, 1460, 1417, 1276, 1204, 1090, 1025  $\text{cm}^{-1}$ . MS (ESI)  $m/z$  (relative intensity): 259 (20)  $[\text{M+Na}]^+$ , 237 (100)  $[\text{M+H}]^+$ . HR-MS (ESI)  $m/z$  calc. for  $\text{C}_{10}\text{H}_{12}\text{F}_3\text{O}_3$   $[\text{M+H}]^+$ : 237.0733, found: 237.0735. The analytical data correspond with those reported in the literature.<sup>[2]</sup>

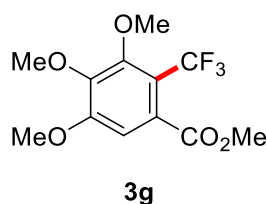

### Methyl 3,4,5-trimethoxy-2-(trifluoromethyl)benzoate (**3g**)

The general procedure A was followed using **1g** (57 mg, 0.25 mmol) at 23 °C for 16 h. Purification by column chromatography on silica gel (*n*-hexane/EtOAc = 5:1) yielded **3g** (46 mg, 62%) as a colorless oil. <sup>1</sup>H-NMR (400 MHz, CDCl<sub>3</sub>): δ = 6.73 (s, 1H), 3.93 (s, 3H), 3.89 (s, 3H), 3.87 (s, 3H), 3.87 (s, 3H). <sup>13</sup>C-NMR (100 MHz, CDCl<sub>3</sub>): δ = 168.4 (C<sub>q</sub>), 155.9 (C<sub>q</sub>), 153.0 (q, <sup>3</sup>J<sub>C-F</sub> = 1.6 Hz, C<sub>q</sub>), 144.2 (C<sub>q</sub>), 128.4 (q, <sup>3</sup>J<sub>C-F</sub> = 2.8 Hz, C<sub>q</sub>), 123.0 (q, <sup>1</sup>J<sub>C-F</sub> = 273.1 Hz, C<sub>q</sub>), 114.6 (q, <sup>2</sup>J<sub>C-F</sub> = 31.0 Hz, C<sub>q</sub>), 106.9 (CH), 61.9 (CH<sub>3</sub>), 60.9 (CH<sub>3</sub>), 56.2 (CH<sub>3</sub>), 53.0 (CH<sub>3</sub>). <sup>19</sup>F-NMR (376 MHz, CDCl<sub>3</sub>): δ = -56.9 (s). IR (ATR): 2952, 1735, 1580, 1457, 1404, 1342, 1300, 1222, 1034 cm<sup>-1</sup>. MS (ESI) *m/z* (relative intensity): 317 (100) [M+Na]<sup>+</sup>. HR-MS (ESI) *m/z* calc. for C<sub>12</sub>H<sub>13</sub>F<sub>3</sub>O<sub>5</sub>Na [M+Na]<sup>+</sup>: 317.0607, found: 317.0611. The analytical data correspond with those reported in the literature.<sup>[3]</sup>

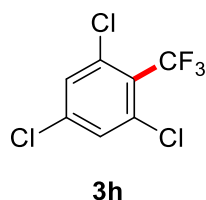

### 1,3,5-Trichloro-2-(trifluoromethyl)benzene (**3h**)

The general procedure B was followed using **1h** (45 mg, 0.25 mmol) at 23 °C for 16 h. Purification by column chromatography on silica gel (pentane) yielded **3h** (31 mg, 50%) as a colorless oil. <sup>1</sup>H-NMR (400 MHz, CDCl<sub>3</sub>): δ = 7.44–7.42 (m, 2H). <sup>13</sup>C-NMR (100 MHz, CDCl<sub>3</sub>): δ = 138.0 (C<sub>q</sub>), 135.3 (q, <sup>3</sup>J<sub>C-F</sub> = 1.3 Hz, C<sub>q</sub>), 130.6 (CH), 124.9 (q, <sup>2</sup>J<sub>C-F</sub> = 31.3 Hz, C<sub>q</sub>), 122.2 (q, <sup>1</sup>J<sub>C-F</sub> = 276.2 Hz, C<sub>q</sub>). <sup>19</sup>F-NMR (376 MHz, CDCl<sub>3</sub>): δ = -55.7 (s). IR (ATR): 2956, 2925, 1580, 1567, 1375, 1283, 1209, 1142, 1114, 1030 cm<sup>-1</sup>. MS (EI) *m/z* (relative intensity): 248 (100) [M]<sup>+</sup>. HR-MS (EI) *m/z* calc. for C<sub>7</sub>H<sub>2</sub><sup>35</sup>Cl<sub>3</sub>F<sub>3</sub> [M]<sup>+</sup>: 247.9169, found: 247.9178. The analytical data correspond with those reported in the literature.<sup>[1]</sup>

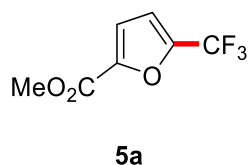

### Methyl 5-(trifluoromethyl)furan-2-carboxylate (**5a**)

The general procedure B was followed using **4a** (32 mg, 0.25 mmol) at 23 °C for 8 h. Purification by column chromatography on silica gel (*n*-hexane/EtOAc = 50:1) yielded **5a** (38 mg, 77%) as a colorless oil. <sup>1</sup>H-NMR (400 MHz, CDCl<sub>3</sub>): δ = 7.18 (dq, *J* = 3.6, 0.9 Hz, 1H), 6.86 (dq, *J* = 3.6, 1.1 Hz, 1H), 3.92 (s, 3H). <sup>13</sup>C-NMR (100 MHz, CDCl<sub>3</sub>): δ = 158.1 (C<sub>q</sub>), 146.3 (q, <sup>4</sup>*J*<sub>C-F</sub> = 1.4 Hz, C<sub>q</sub>), 144.6 (q, <sup>2</sup>*J*<sub>C-F</sub> = 43.3 Hz, C<sub>q</sub>), 118.3 (q, <sup>1</sup>*J*<sub>C-F</sub> = 268.2 Hz, C<sub>q</sub>), 117.6 (CH), 112.8 (q, <sup>3</sup>*J*<sub>C-F</sub> = 2.7 Hz, CH), 52.5 (CH<sub>3</sub>). <sup>19</sup>F-NMR (376 MHz, CDCl<sub>3</sub>): δ = -64.5 (s). IR (ATR): 2957, 2923, 1740, 1461, 1378, 1309, 1147 cm<sup>-1</sup>. MS (ESI) *m/z* (relative intensity): 217 (20) [M+Na]<sup>+</sup>, 195 (100) [M+H]<sup>+</sup>. HR-MS (ESI) *m/z* calc. for C<sub>7</sub>H<sub>5</sub>F<sub>3</sub>O<sub>3</sub>Na [M+Na]<sup>+</sup>: 217.0083, found: 217.0086. The analytical data correspond with those reported in the literature.<sup>[1]</sup>

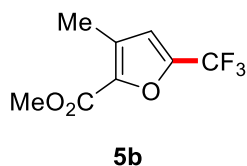

### Methyl 3-methyl-5-(trifluoromethyl)furan-2-carboxylate (**5b**)

The general procedure B was followed using **4b** (35 mg, 0.25 mmol) at 23 °C for 16 h. Purification by column chromatography on silica gel (*n*-hexane/DCM = 1:1) yielded **5b** (37 mg, 71%) as a colorless oil. <sup>1</sup>H-NMR (400 MHz, CDCl<sub>3</sub>): δ = 6.74–6.69 (m, 1H), 3.90 (s, 3H), 2.36 (s, 3H). <sup>13</sup>C-NMR (100 MHz, CDCl<sub>3</sub>): δ = 159.1 (C<sub>q</sub>), 143.0 (q, <sup>2</sup>*J*<sub>C-F</sub> = 43.0 Hz, C<sub>q</sub>), 141.7 (q, <sup>4</sup>*J*<sub>C-F</sub> = 1.5 Hz, C<sub>q</sub>), 130.8 (C<sub>q</sub>), 118.4 (q, <sup>1</sup>*J*<sub>C-F</sub> = 268.3 Hz, C<sub>q</sub>), 115.7 (q, <sup>3</sup>*J*<sub>C-F</sub> = 2.6 Hz, CH), 52.0 (CH<sub>3</sub>), 11.4 (CH<sub>3</sub>). <sup>19</sup>F-NMR (376 MHz, CDCl<sub>3</sub>): δ = -64.6 (s). IR (ATR): 2954, 2924, 1747, 1460, 1377, 1261, 1105 cm<sup>-1</sup>. MS (ESI) *m/z* (relative intensity): 231 (30) [M+Na]<sup>+</sup>, 209 (10) [M+H]<sup>+</sup>. HR-MS (ESI) *m/z* calc. for C<sub>8</sub>H<sub>8</sub>F<sub>3</sub>O<sub>3</sub> [M+H]<sup>+</sup>: 209.0420, found: 209.0418.

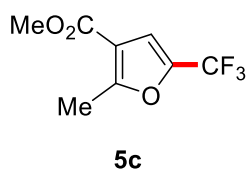

### Methyl 2-methyl-5-(trifluoromethyl)furan-3-carboxylate (**5c**)

The general procedure B was followed using **4c** (35 mg, 0.25 mmol) at 23 °C for 16 h. Purification by column chromatography on silica gel (*n*-hexane/DCM = 1:1) yielded **5c**

(33 mg, 64%) as a colorless oil.  $^1\text{H-NMR}$  (400 MHz,  $\text{CDCl}_3$ ):  $\delta$  = 7.06 (s, 1H), 3.88 (s, 3H), 2.66 (s, 3H).  $^{13}\text{C-NMR}$  (100 MHz,  $\text{CDCl}_3$ ):  $\delta$  = 163.2 ( $\text{C}_q$ ), 161.5 ( $\text{C}_q$ ), 139.8 (q,  $^2J_{\text{C-F}} = 43.4$  Hz,  $\text{C}_q$ ), 118.7 (q,  $^1J_{\text{C-F}} = 267.0$  Hz,  $\text{C}_q$ ), 114.4 ( $\text{C}_q$ ), 112.6 (q,  $^3J_{\text{C-F}} = 2.8$  Hz, CH), 51.7 ( $\text{CH}_3$ ), 13.8 ( $\text{CH}_3$ ).  $^{19}\text{F-NMR}$  (376 MHz,  $\text{CDCl}_3$ ):  $\delta$  = -64.5 (s). IR (ATR): 2956, 2925, 1730, 1621, 1448, 1255, 1135, 1063  $\text{cm}^{-1}$ . MS (ESI)  $m/z$  (relative intensity): 231 (5)  $[\text{M}+\text{Na}]^+$ , 209 (20)  $[\text{M}+\text{H}]^+$ . HR-MS (ESI)  $m/z$  calc. for  $\text{C}_8\text{H}_8\text{F}_3\text{O}_3$   $[\text{M}+\text{H}]^+$ : 209.0420, found: 209.0426.

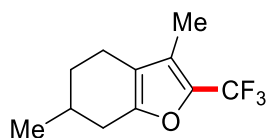

**5d**

### 3,6-Dimethyl-2-(trifluoromethyl)-4,5,6,7-tetrahydrobenzofuran (**5d**)

The general procedure A was followed using **4d** (38 mg, 0.25 mmol) at 23 °C for 16 h. Purification by column chromatography on silica gel (pentane) yielded **5d** (36 mg, 65%) as a colorless oil.  $^1\text{H-NMR}$  (400 MHz,  $\text{CDCl}_3$ ):  $\delta$  = 2.75–2.64 (m, 1H), 2.45–2.27 (m, 2H), 2.25–2.15 (m, 1H), 2.06 (q,  $J = 2.0$  Hz, 3H), 2.02–1.91 (m, 1H), 1.91–1.83 (m, 1H), 1.45–1.32 (m, 1H), 1.11 (d,  $J = 6.7$  Hz, 3H).  $^{13}\text{C-NMR}$  (100 MHz,  $\text{CDCl}_3$ ):  $\delta$  = 152.4 (q,  $^4J_{\text{C-F}} = 1.4$  Hz,  $\text{C}_q$ ), 134.9 (q,  $^2J_{\text{C-F}} = 39.9$  Hz,  $\text{C}_q$ ), 122.5 (q,  $^3J_{\text{C-F}} = 2.4$  Hz,  $\text{C}_q$ ), 120.7 (q,  $^1J_{\text{C-F}} = 266.9$  Hz,  $\text{C}_q$ ), 119.0 ( $\text{C}_q$ ), 31.1 ( $\text{CH}_2$ ), 30.8 ( $\text{CH}_2$ ), 29.4 (CH), 21.3 ( $\text{CH}_3$ ), 19.5 ( $\text{CH}_2$ ), 7.9 ( $\text{CH}_3$ ).  $^{19}\text{F-NMR}$  (282 MHz,  $\text{CDCl}_3$ ):  $\delta$  = -61.2 (s). IR (ATR): 2927, 1590, 1424, 1368, 1355, 1113, 1045  $\text{cm}^{-1}$ . MS (EI)  $m/z$  (relative intensity): 218 (30)  $[\text{M}]^+$ . HR-MS (EI)  $m/z$  calc. for  $\text{C}_{11}\text{H}_{13}\text{F}_3\text{O}$   $[\text{M}]^+$ : 218.0913, found: 218.0923.

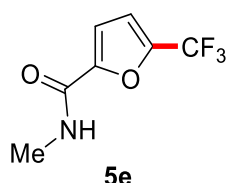

**5e**

### *N*-Methyl-5-(trifluoromethyl)furan-2-carboxamide (**5e**)

The general procedure B was followed using **4e** (31 mg, 0.25 mmol) at 23 °C for 16 h. Purification by column chromatography on silica gel (*n*-hexane/EtOAc = 2:1) yielded **5e** (33 mg, 69%) as a white solid. M. p.: 78–80 °C.  $^1\text{H-NMR}$  (500 MHz,  $\text{CDCl}_3$ ):  $\delta$  = 7.16–7.09 (m, 1H), 6.89–6.83 (m, 1H), 6.45 (brs, 1H), 2.99 (d,  $J = 5.0$  Hz, 3H).  $^{13}\text{C-NMR}$  (125 MHz,  $\text{CDCl}_3$ ):  $\delta$  = 157.8 ( $\text{C}_q$ ), 149.7 (q,  $^4J_{\text{C-F}} = 1.3$  Hz,  $\text{C}_q$ ), 142.4 (q,  $^2J_{\text{C-F}} = 43.2$  Hz,  $\text{C}_q$ ), 118.4 (q,

$^1J_{C-F} = 267.8$  Hz, C<sub>q</sub>), 114.0 (CH), 113.4 (q,  $^3J_{C-F} = 2.7$  Hz, CH), 26.0 (CH<sub>3</sub>).  $^{19}\text{F-NMR}$  (470 MHz, CDCl<sub>3</sub>):  $\delta = -64.3$  (s). IR (ATR): 3294, 2953, 2922, 1656, 1574, 1309, 1178, 1107, 1017 cm<sup>-1</sup>. MS (ESI)  $m/z$  (relative intensity): 216 (100) [M+Na]<sup>+</sup>, 194 (45) [M+H]<sup>+</sup>. HR-MS (ESI)  $m/z$  calc. for C<sub>7</sub>H<sub>7</sub>F<sub>3</sub>NO<sub>2</sub> [M+H]<sup>+</sup>: 194.0423, found: 194.0422.

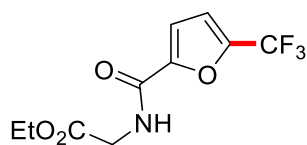

**5f**

### Ethyl (5-(trifluoromethyl)furan-2-carbonyl)glycinate (**5f**)

The general procedure B was followed using **4f** (49 mg, 0.25 mmol) at 23 °C for 16 h. Purification by column chromatography on silica gel (*n*-hexane/EtOAc = 2:1) yielded **5f** (46 mg, 70%) as a white solid. M. p.: 66–68 °C.  $^1\text{H-NMR}$  (400 MHz, CDCl<sub>3</sub>):  $\delta = 7.15$  (dq,  $J = 3.6, 0.9$  Hz, 1H), 6.90 (s, 1H), 6.87 (dq,  $J = 3.6, 1.1$  Hz, 1H), 4.24 (q,  $J = 7.2$  Hz, 2H), 4.19 (d,  $J = 5.4$  Hz, 2H), 1.29 (t,  $J = 7.2$  Hz, 3H).  $^{13}\text{C-NMR}$  (100 MHz, CDCl<sub>3</sub>):  $\delta = 169.3$  (C<sub>q</sub>), 157.1 (C<sub>q</sub>), 149.0 (q,  $^4J_{C-F} = 1.3$  Hz, C<sub>q</sub>), 142.9 (q,  $^2J_{C-F} = 43.3$  Hz, C<sub>q</sub>), 118.3 (d,  $^1J_{C-F} = 267.9$  Hz, C<sub>q</sub>), 114.8 (CH), 113.4 (q,  $^3J_{C-F} = 2.7$  Hz, CH), 61.8 (CH<sub>2</sub>), 41.1 (CH<sub>2</sub>), 14.1 (CH<sub>3</sub>).  $^{19}\text{F-NMR}$  (376 MHz, CDCl<sub>3</sub>):  $\delta = -64.3$  (s). IR (ATR): 3329, 2988, 2943, 1744, 1665, 1572, 1307, 1182, 1109, 1019 cm<sup>-1</sup>. MS (ESI)  $m/z$  (relative intensity): 288 (100) [M+Na]<sup>+</sup>, 266 (10) [M+H]<sup>+</sup>. HR-MS (ESI)  $m/z$  calc. for C<sub>10</sub>H<sub>11</sub>F<sub>3</sub>NO<sub>4</sub> [M+H]<sup>+</sup>: 266.0635, found: 266.0634.

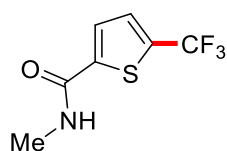

**5g**

### *N*-Methyl-5-(trifluoromethyl)thiophene-2-carboxamide (**5g**)

The general procedure B was followed using **4g** (35 mg, 0.25 mmol) at 23 °C for 16 h. Purification by column chromatography on silica gel (*n*-hexane/EtOAc = 2:1) yielded **5g** (38 mg, 73%) as a white solid. M. p.: 130–132 °C.  $^1\text{H-NMR}$  (400 MHz, CDCl<sub>3</sub>):  $\delta = 7.38$  (dq,  $J = 3.9, 1.1$  Hz, 1H), 7.36 (dq,  $J = 3.9, 0.9$  Hz, 1H), 6.24 (brs, 1H), 2.99 (d,  $J = 4.9$  Hz, 3H).  $^{13}\text{C-NMR}$  (100 MHz, CDCl<sub>3</sub>):  $\delta = 161.4$  (C<sub>q</sub>), 142.6 (C<sub>q</sub>), 134.9 (q,  $^2J_{C-F} = 38.7$  Hz, C<sub>q</sub>), 128.6 (q,  $^3J_{C-F} = 3.7$  Hz, CH), 126.6 (CH), 121.9 (q,  $^1J_{C-F} = 269.6$  Hz, C<sub>q</sub>), 26.9 (CH<sub>3</sub>).  $^{19}\text{F-NMR}$  (376 MHz, CDCl<sub>3</sub>):  $\delta = -56.0$  (s). IR (ATR): 3276, 2986, 1734, 1373, 1239, 1045, 913 cm<sup>-1</sup>. MS (ESI)  $m/z$  (relative intensity): 232 (100) [M+Na]<sup>+</sup>, 210 (30) [M+H]<sup>+</sup>. HR-MS (ESI)  $m/z$  calc. for C<sub>7</sub>H<sub>7</sub>F<sub>3</sub>NOS [M+H]<sup>+</sup>: 210.0195, found: 210.0190.

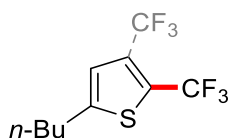

**5h** (ratio: 10/1)

### 2-Butyl-5-(trifluoromethyl)thiophene (**5h**)

The ratio of two mono-substituted products was determined to be 10:1 by  $^1\text{H-NMR}$  analysis of the crude reaction mixture. The general procedure A was followed using **4h** (35 mg, 0.25 mmol) at 23 °C for 16 h. Purification by column chromatography on silica gel (*n*-hexane) yielded **5h** (34 mg, 65%) as a colorless oil.  $^1\text{H-NMR}$  (300 MHz,  $\text{CDCl}_3$ ):  $\delta$  = 7.28–7.25 (m, 1H), 6.78–6.73 (m, 1H), 2.85 (t,  $J$  = 7.6 Hz, 2H), 1.75–1.64 (m, 2H), 1.49–1.35 (m, 2H), 0.97 (t,  $J$  = 7.3 Hz, 3H).  $^{13}\text{C-NMR}$  (100 MHz,  $\text{CDCl}_3$ ):  $\delta$  = 150.3 (q,  $^4J_{\text{C-F}}$  = 1.3 Hz,  $\text{C}_q$ ), 128.4 (q,  $^3J_{\text{C-F}}$  = 3.8 Hz, CH), 128.3 (q,  $^2J_{\text{C-F}}$  = 38.2 Hz,  $\text{C}_q$ ), 123.8 (CH), 122.6 (q,  $^1J_{\text{C-F}}$  = 268.1 Hz,  $\text{C}_q$ ), 33.6 ( $\text{CH}_2$ ), 29.7 ( $\text{CH}_2$ ), 22.1 ( $\text{CH}_2$ ), 13.7 ( $\text{CH}_3$ ).  $^{19}\text{F-NMR}$  (282 MHz,  $\text{CDCl}_3$ ):  $\delta$  = –55.1 (s). IR (ATR): 2957, 2924, 1481, 1378, 1299, 1154, 1125, 1051  $\text{cm}^{-1}$ . MS (EI)  $m/z$  (relative intensity): 208 (30)  $[\text{M}]^+$ , 165 (100). HR-MS (EI)  $m/z$  calc. for  $\text{C}_9\text{H}_{11}\text{F}_3\text{S}$   $[\text{M}]^+$ : 208.0534, found: 208.0526.

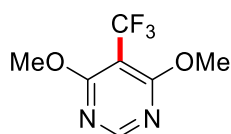

**5i**

### 4,6-Dimethoxy-5-(trifluoromethyl)pyrimidine (**5i**)

The general procedure B was followed using **4i** (35 mg, 0.25 mmol) at 23 °C for 15 h. Purification by column chromatography on silica gel (*n*-hexane/EtOAc = 30:1) yielded **5i** (32 mg, 62%) as a white solid. M. p.: 94–96 °C.  $^1\text{H-NMR}$  (400 MHz,  $\text{CDCl}_3$ ):  $\delta$  = 8.45 (s, 1H), 4.02 (s, 6H).  $^{13}\text{C-NMR}$  (100 MHz,  $\text{CDCl}_3$ ):  $\delta$  = 167.9 ( $\text{C}_q$ ), 158.9 (CH), 122.8 (q,  $^1J_{\text{C-F}}$  = 272.9 Hz,  $\text{C}_q$ ), 95.4 (q,  $^2J_{\text{C-F}}$  = 33.8 Hz,  $\text{C}_q$ ), 55.0 ( $\text{CH}_3$ ).  $^{19}\text{F-NMR}$  (376 MHz,  $\text{CDCl}_3$ ):  $\delta$  = –56.9 (s). IR (ATR): 2954, 2924, 1573, 1476, 1386, 1244, 1099, 1034  $\text{cm}^{-1}$ . MS (ESI)  $m/z$  (relative intensity): 231 (50)  $[\text{M}+\text{Na}]^+$ , 209 (100)  $[\text{M}+\text{H}]^+$ . HR-MS (ESI)  $m/z$  calc. for  $\text{C}_7\text{H}_8\text{F}_3\text{N}_2\text{O}_2$   $[\text{M}+\text{H}]^+$ : 209.0538, found: 209.0540. The analytical data correspond with those reported in the literature.<sup>[1]</sup>

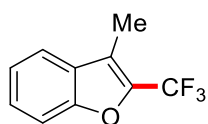

**5j**

### 3-Methyl-2-(trifluoromethyl)benzofuran (**5j**)

The general procedure A was followed using **4j** (33 mg, 0.25 mmol) at 23 °C for 8 h. Purification by column chromatography on silica gel (*n*-hexane) yielded **5j** (36 mg, 72%) as a colorless oil. <sup>1</sup>H-NMR (400 MHz, CDCl<sub>3</sub>): δ = 7.59 (d, *J* = 7.8 Hz, 1H), 7.52–7.48 (m, 1H), 7.45–7.39 (m, 1H), 7.31 (ddd, *J* = 7.8, 7.2, 1.0 Hz, 1H), 2.39 (q, *J* = 2.1 Hz, 3H). <sup>13</sup>C-NMR (100 MHz, CDCl<sub>3</sub>): δ = 154.0 (C<sub>q</sub>), 138.5 (q, <sup>2</sup>*J*<sub>C-F</sub> = 39.8 Hz, C<sub>q</sub>), 128.4 (C<sub>q</sub>), 126.9 (CH), 123.3 (CH), 120.6 (CH), 120.5 (q, <sup>1</sup>*J*<sub>C-F</sub> = 267.0 Hz, C<sub>q</sub>), 118.2 (q, <sup>3</sup>*J*<sub>C-F</sub> = 2.7 Hz, C<sub>q</sub>), 111.9 (CH), 7.7 (q, <sup>4</sup>*J*<sub>C-F</sub> = 1.0 Hz, CH<sub>3</sub>). <sup>19</sup>F-NMR (376 MHz, CDCl<sub>3</sub>): δ = -62.0 (s). IR (ATR): 2956, 2925, 1635, 1454, 1385, 1302, 1129, 1083, 1041 cm<sup>-1</sup>. MS (EI) *m/z* (relative intensity): 200 (100) [M]<sup>+</sup>. HR-MS (EI) *m/z* calc. for C<sub>10</sub>H<sub>7</sub>F<sub>3</sub>O [M]<sup>+</sup>: 200.0444, found: 200.0443. The analytical data correspond with those reported in the literature.<sup>[1]</sup>

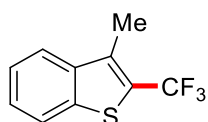

**5k**

### 3-Methyl-2-(trifluoromethyl)benzo[*b*]thiophene (**5k**)

The general procedure A was followed using **4k** (37 mg, 0.25 mmol) at 23 °C for 8 h. Purification by column chromatography on silica gel (*n*-hexane) yielded **5k** (35 mg, 65%) as a colorless oil. <sup>1</sup>H-NMR (400 MHz, CDCl<sub>3</sub>): δ = 7.86–7.81 (m, 1H), 7.80–7.76 (m, 1H), 7.48–7.41 (m, 2H), 2.55 (q, *J* = 1.8 Hz, 3H). <sup>13</sup>C-NMR (100 MHz, CDCl<sub>3</sub>): δ = 139.6 (C<sub>q</sub>), 138.5 (q, <sup>4</sup>*J*<sub>C-F</sub> = 1.0 Hz, C<sub>q</sub>), 134.7 (q, <sup>3</sup>*J*<sub>C-F</sub> = 3.3 Hz, C<sub>q</sub>), 126.5 (CH), 124.9 (q, <sup>2</sup>*J*<sub>C-F</sub> = 31.4 Hz, C<sub>q</sub>), 124.8 (CH), 123.2 (q, <sup>1</sup>*J*<sub>C-F</sub> = 270.5 Hz, C<sub>q</sub>), 123.0 (CH), 122.6 (CH), 11.9 (CH<sub>3</sub>). <sup>19</sup>F-NMR (282 MHz, CDCl<sub>3</sub>): δ = -54.1 (s). IR (ATR): 2957, 2928, 1579, 1438, 1359, 1290, 1120, 989 cm<sup>-1</sup>. MS (EI) *m/z* (relative intensity): 216 (100) [M]<sup>+</sup>. HR-MS (EI) *m/z* calc. for C<sub>10</sub>H<sub>7</sub>F<sub>3</sub>O [M]<sup>+</sup>: 216.0215, found: 216.0212. The analytical data correspond with those reported in the literature.<sup>[1]</sup>

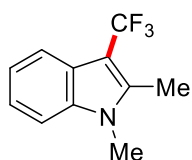

**5l**

### 1,2-Dimethyl-3-(trifluoromethyl)-1*H*-indole (**5l**)

The general procedure A was followed using **4l** (36 mg, 0.25 mmol) at 23 °C for 16 h. Purification by column chromatography on silica gel (*n*-hexane/EtOAc = 30:1) yielded **5l**

(30 mg, 57%) as a colorless oil.  $^1\text{H-NMR}$  (400 MHz,  $\text{CDCl}_3$ ):  $\delta = 7.72\text{--}7.67$  (m, 1H), 7.30–7.26 (m, 1H), 7.25–7.20 (m, 1H), 7.19–7.14 (m, 1H), 3.67 (s, 3H), 2.52 (q,  $J = 1.4$  Hz, 3H).  $^{13}\text{C-NMR}$  (100 MHz,  $\text{CDCl}_3$ ):  $\delta = 137.2$  (q,  $^3J_{\text{C-F}} = 3.8$  Hz,  $\text{C}_q$ ), 136.1 ( $\text{C}_q$ ), 125.5 (q,  $^1J_{\text{C-F}} = 266.7$  Hz,  $\text{C}_q$ ), 124.4 (q,  $^3J_{\text{C-F}} = 1.8$  Hz,  $\text{C}_q$ ), 122.0 (CH), 121.0 (CH), 119.0 (CH), 109.2 (CH), 102.6 (q,  $^2J_{\text{C-F}} = 35.2$  Hz,  $\text{C}_q$ ), 29.5 ( $\text{CH}_3$ ), 10.9 (q,  $^4J_{\text{C-F}} = 1.8$  Hz,  $\text{CH}_3$ ).  $^{19}\text{F-NMR}$  (376 MHz,  $\text{CDCl}_3$ ):  $\delta = -53.7$  (s). IR (ATR): 2949, 2926, 1617, 1558, 1475, 1416, 1283, 1226, 1076  $\text{cm}^{-1}$ . MS (ESI)  $m/z$  (relative intensity): 236 (100)  $[\text{M}+\text{Na}]^+$ , 214 (40)  $[\text{M}+\text{H}]^+$ . HR-MS (ESI)  $m/z$  calc. for  $\text{C}_{11}\text{H}_{11}\text{F}_3\text{N}$   $[\text{M}+\text{H}]^+$ : 214.0838, found: 214.0833. The analytical data correspond with those reported in the literature.<sup>[2]</sup>

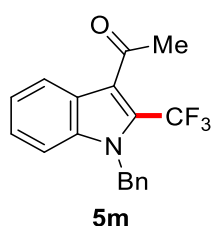

#### 1-(1-Benzyl-2-(trifluoromethyl)-1H-indol-3-yl)ethan-1-one (5m)

The general procedure B was followed using **4m** (62 mg, 0.25 mmol) at 23 °C for 16 h. Purification by column chromatography on silica gel (*n*-hexane/EtOAc = 15:1) yielded **5m** (45 mg, 57%) as a colorless oil.  $^1\text{H-NMR}$  (400 MHz,  $\text{CDCl}_3$ ):  $\delta = 7.94$  (d,  $J = 8.0$  Hz, 1H), 7.39–7.27 (m, 6H), 7.07–7.00 (m, 2H), 5.6 (s, 2H), 2.7 (s, 3H).  $^{13}\text{C-NMR}$  (100 MHz,  $\text{CDCl}_3$ ):  $\delta = 196.8$  ( $\text{C}_q$ ), 137.0 ( $\text{C}_q$ ), 136.0 ( $\text{C}_q$ ), 128.9 (CH), 127.8 (CH), 125.8 (CH), 125.8 (CH), 125.3 (d,  $^2J_{\text{C-F}} = 37.5$  Hz), 124.8 ( $\text{C}_q$ ), 122.8 (CH), 121.9 (CH), 121.1 (q,  $^1J_{\text{C-F}} = 268.9$  Hz,  $\text{C}_q$ ), 120.4 (q,  $^3J_{\text{C-F}} = 2.7$  Hz,  $\text{C}_q$ ), 111.0 (CH), 48.8 (q,  $^4J_{\text{C-F}} = 2.9$  Hz,  $\text{CH}_2$ ), 32.0 (q,  $^5J_{\text{C-F}} = 3.0$  Hz,  $\text{CH}_3$ ).  $^{19}\text{F-NMR}$  (282 MHz,  $\text{CDCl}_3$ ):  $\delta = -54.3$  (s). IR (ATR): 2956, 2925, 1680, 1541, 1416, 1352, 1249, 1226, 1164, 1117, 1089  $\text{cm}^{-1}$ . MS (ESI)  $m/z$  (relative intensity): 340 (100)  $[\text{M}+\text{Na}]^+$ , 318 (30)  $[\text{M}+\text{H}]^+$ . HR-MS (ESI)  $m/z$  calc. for  $\text{C}_{18}\text{H}_{15}\text{F}_3\text{NO}$   $[\text{M}+\text{H}]^+$ : 318.1100, found: 318.1097.

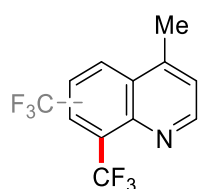

#### 4-Methyl-2-(trifluoromethyl)quinoline (5n)



The ratio of two mono-substituted products was determined to be 20:1 by  $^1\text{H-NMR}$  analysis of the crude reaction mixture, while the exact substituent position in the minor component could not be identified. The general procedure A was followed using **4n** (36 mg, 0.25 mmol) at 23 °C for 15 h. Purification by column chromatography on silica gel (*n*-hexane/EtOAc = 10:1) yielded **5n** (29 mg, 55%) as a colorless oil.  $^1\text{H-NMR}$  (500 MHz,  $\text{CDCl}_3$ ):  $\delta$  = 8.92 (d,  $J$  = 4.4 Hz, 1H), 8.20 (dd,  $J$  = 8.4, 0.8 Hz, 1H), 8.06 (ddq,  $J$  = 7.4, 1.5, 0.8 Hz, 1H), 7.60 (ddd,  $J$  = 8.4, 7.4, 0.8 Hz, 1H), 7.32 (dq,  $J$  = 4.4, 1.0 Hz, 1H), 2.73 (d,  $J$  = 1.0 Hz, 3H).  $^{13}\text{C-NMR}$  (125 MHz,  $\text{CDCl}_3$ ):  $\delta$  = 150.9 (CH), 144.6 (q,  $^3J_{\text{C-F}}$  = 3.2 Hz,  $\text{C}_q$ ), 144.6 ( $\text{C}_q$ ), 128.8 ( $\text{C}_q$ ), 128.4 (q,  $^4J_{\text{C-F}}$  = 0.8 Hz, CH), 128.2 (q,  $^2J_{\text{C-F}}$  = 29.2 Hz,  $\text{C}_q$ ), 127.6 (q,  $^3J_{\text{C-F}}$  = 5.7 Hz, CH), 124.8 (CH), 124.2 (q,  $^1J_{\text{C-F}}$  = 273.4 Hz,  $\text{C}_q$ ), 122.7 (CH), 19.0 ( $\text{CH}_3$ ).  $^{19}\text{F-NMR}$  (470 MHz,  $\text{CDCl}_3$ ):  $\delta$  = -60.0 (s). IR (ATR): 2954, 2925, 1601, 1513, 1315, 1296, 1133, 1092  $\text{cm}^{-1}$ . MS (ESI)  $m/z$  (relative intensity): 234 (95)  $[\text{M}+\text{Na}]^+$ , 212 (100)  $[\text{M}+\text{H}]^+$ . HR-MS (ESI)  $m/z$  calc. for  $\text{C}_{11}\text{H}_9\text{F}_3\text{N}$   $[\text{M}+\text{H}]^+$ : 212.0682, found: 212.0682.

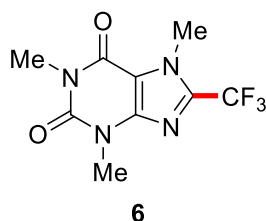

### 1,3,7-Trimethyl-8-(trifluoromethyl)-3,7-dihydro-1H-purine-2,6-dione (**6**)

The general procedure A was followed using caffeine (49 mg, 0.25 mmol) at 23 °C for 8 h. Purification by column chromatography on silica gel (*n*-hexane/EtOAc = 3:1) yielded **6** (46 mg, 70%) as a white solid. M. p.: 128–130 °C.  $^1\text{H-NMR}$  (400 MHz,  $\text{CDCl}_3$ ):  $\delta$  = 4.13 (q,  $J$  = 1.2 Hz, 3H), 3.56 (s, 3H), 3.39 (s, 3H).  $^{13}\text{C-NMR}$  (100 MHz,  $\text{CDCl}_3$ ):  $\delta$  = 155.4 ( $\text{C}_q$ ), 151.3 ( $\text{C}_q$ ), 146.5 ( $\text{C}_q$ ), 138.9 (q,  $^2J_{\text{C-F}}$  = 40.0 Hz,  $\text{C}_q$ ), 118.2 (q,  $^1J_{\text{C-F}}$  = 271.3 Hz,  $\text{C}_q$ ), 109.6 ( $\text{C}_q$ ), 33.2 (q,  $^4J_{\text{C-F}}$  = 1.9 Hz,  $\text{CH}_3$ ), 29.9 ( $\text{CH}_3$ ), 28.2 ( $\text{CH}_3$ ).  $^{19}\text{F-NMR}$  (376 MHz,  $\text{CDCl}_3$ ):  $\delta$  = -62.4 (s). IR (ATR): 2957, 2927, 1708, 1662, 1548, 1460, 1428, 1243, 1141, 1098  $\text{cm}^{-1}$ . MS (ESI)  $m/z$  (relative intensity): 285 (80)  $[\text{M}+\text{Na}]^+$ , 263 (100)  $[\text{M}+\text{H}]^+$ . HR-MS (ESI)  $m/z$  calc. for  $\text{C}_9\text{H}_{10}\text{F}_3\text{N}_4\text{O}_2$   $[\text{M}+\text{H}]^+$ : 263.0750, found: 263.0751. The analytical data correspond with those reported in the literature.<sup>[2]</sup>

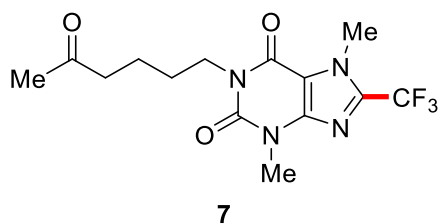

### 3,7-Dimethyl-1-(5-oxohexyl)-8-(trifluoromethyl)-3,7-dihydro-1H-purine-2,6-dione (**7**)

The general procedure A was followed using Pentoxifylline (70 mg, 0.25 mmol) at 23 °C for 16 h. Purification by column chromatography on silica gel (*n*-hexane/EtOAc = 1:1) yielded **7** (63 mg, 72%) as a colorless oil. <sup>1</sup>H-NMR (400 MHz, CDCl<sub>3</sub>): δ = 4.11 (q, *J* = 1.2 Hz, 3H), 3.98 (t, *J* = 8.0 Hz, 2H), 3.54 (s, 3H), 2.46 (t, *J* = 6.9 Hz, 2H), 2.10 (s, 3H), 1.67–1.56 (m, 4H). <sup>13</sup>C-NMR (100 MHz, CDCl<sub>3</sub>): δ = 208.5 (C<sub>q</sub>), 155.3 (C<sub>q</sub>), 151.0 (C<sub>q</sub>), 146.5 (C<sub>q</sub>), 138.9 (q, <sup>2</sup>*J*<sub>C-F</sub> = 40.1 Hz, C<sub>q</sub>), 118.2 (q, <sup>1</sup>*J*<sub>C-F</sub> = 271.4 Hz, C<sub>q</sub>), 109.6 (C<sub>q</sub>), 43.0 (CH<sub>2</sub>), 41.1 (CH<sub>2</sub>), 33.1 (q, <sup>4</sup>*J*<sub>C-F</sub> = 2.0 Hz, CH<sub>3</sub>), 29.9 (CH<sub>3</sub>), 29.8 (CH<sub>3</sub>), 27.3 (CH<sub>2</sub>), 20.8 (CH<sub>2</sub>). <sup>19</sup>F-NMR (376 MHz, CDCl<sub>3</sub>): δ = -62.4 (s). IR (ATR): 2957, 1708, 1661, 1609, 1547, 1462, 1334, 1247, 1130, 1098 cm<sup>-1</sup>. MS (ESI) *m/z* (relative intensity): 369 (100) [M+Na]<sup>+</sup>, 347 (20) [M+H]<sup>+</sup>. HR-MS (ESI) *m/z* calc. for C<sub>14</sub>H<sub>18</sub>F<sub>3</sub>N<sub>4</sub>O<sub>3</sub> [M+H]<sup>+</sup>: 347.1326, found: 347.1320. The analytical data correspond with those reported in the literature.<sup>[2]</sup>

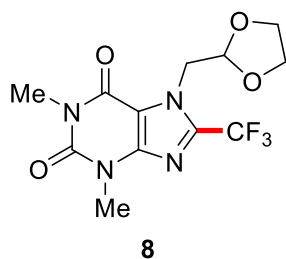

### 7-((1,3-Dioxolan-2-yl)methyl)-1,3-dimethyl-8-(trifluoromethyl)-3,7-dihydro-1H-purine-2,6-dione (**8**)

The general procedure A was followed using Doxofylline (67 mg, 0.25 mmol) at 23 °C for 16 h. Purification by column chromatography on silica gel (*n*-hexane/EtOAc = 2:1) yielded **8** (55 mg, 65%) as a colorless oil. <sup>1</sup>H-NMR (400 MHz, CDCl<sub>3</sub>): δ = 5.31 (t, *J* = 4.3 Hz, 1H), 4.65 (dd, *J* = 4.3, 1.0 Hz, 2H), 3.96–3.83 (m, 4H), 3.57 (s, 3H), 3.39 (s, 3H). <sup>13</sup>C-NMR (100 MHz, CDCl<sub>3</sub>): δ = 155.3 (C<sub>q</sub>), 151.3 (C<sub>q</sub>), 146.7 (C<sub>q</sub>), 139.1 (q, <sup>2</sup>*J*<sub>C-F</sub> = 40.0 Hz, C<sub>q</sub>), 118.2 (q, <sup>1</sup>*J*<sub>C-F</sub> = 271.6 Hz, C<sub>q</sub>), 109.5 (C<sub>q</sub>), 100.9 (CH), 65.3 (CH<sub>2</sub>), 48.6 (q, <sup>4</sup>*J*<sub>C-F</sub> = 1.5 Hz, CH<sub>2</sub>), 29.9 (CH<sub>3</sub>), 28.3 (CH<sub>3</sub>). <sup>19</sup>F-NMR (376 MHz, CDCl<sub>3</sub>): δ = -62.4 (s). IR (ATR): 2957, 2896, 1710, 1661, 1612, 1545, 1455, 1346, 1267, 1128, 1038 cm<sup>-1</sup>. MS (ESI) *m/z* (relative intensity): 357

(100)  $[M+Na]^+$ , 335 (15)  $[M+H]^+$ . HR-MS (ESI)  $m/z$  calc. for  $C_{12}H_{14}F_3N_4O_4$   $[M+H]^+$ : 335.0962, found: 335.0970.

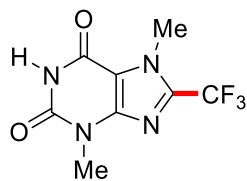

**9**

### 3,7-Dimethyl-8-(trifluoromethyl)-3,7-dihydro-1H-purine-2,6-dione (**9**)

The general procedure A was followed using Theobromine (45 mg, 0.25 mmol) at 23 °C for 16 h. Purification by column chromatography on silica gel (*n*-hexane/EtOAc = 1:1) yielded **9** (28 mg, 45%) as a white solid. M. p.: 206–208 °C (dark, decomposed).  $^1H$ -NMR (500 MHz,  $CDCl_3$ ):  $\delta$  = 8.45 (s, 1H), 4.12 (q,  $J$  = 1.2 Hz, 3H), 3.53 (s, 3H).  $^{13}C$ -NMR (125 MHz,  $CDCl_3$ ):  $\delta$  = 154.6 ( $C_q$ ), 150.5 ( $C_q$ ), 148.4 ( $C_q$ ), 139.5 (q,  $^2J_{C-F}$  = 40.3 Hz,  $C_q$ ), 118.0 (q,  $^1J_{C-F}$  = 271.4 Hz,  $C_q$ ), 109.9 ( $C_q$ ), 33.3 (q,  $^4J_{C-F}$  = 1.9 Hz,  $CH_3$ ), 29.2 ( $CH_3$ ).  $^{19}F$ -NMR (470 MHz,  $CDCl_3$ ):  $\delta$  = -62.5 (s). IR (ATR): 3169, 2958, 2924, 1701, 1548, 1351, 1247, 1194, 1141, 1102  $cm^{-1}$ . MS (ESI)  $m/z$  (relative intensity): 271 (30)  $[M+Na]^+$ , 249 (100)  $[M+H]^+$ . HR-MS (ESI)  $m/z$  calc. for  $C_8H_8F_3N_4O_2$   $[M+H]^+$ : 249.0594, found: 249.0602. The analytical data correspond with those reported in the literature.<sup>[4]</sup>

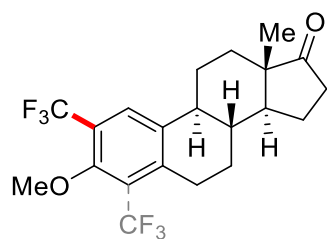

**10** (ratio: 3/1)

### (8*R*,9*S*,13*S*,14*S*)-3-Methoxy-13-methyl-2-(trifluoromethyl)-6,7,8,9,11,12,13,14,15,16-decahydro-17*H*-cyclopenta[*a*]phenanthren-17-one (**10**)

The ratio of two mono-substituted products was determined to be 3:1 by  $^1H$ -NMR analysis of the crude reaction mixture. The general procedure B was followed using Methyl Estrone (71 mg, 0.25 mmol) at 23 °C for 16 h. Purification by column chromatography on silica gel (*n*-hexane) yielded **10** (48 mg, 55%) as a yellow oil. The ratio was determined to be 10:1 by  $^1H$ -NMR analysis after column.  $^1H$ -NMR (400 MHz,  $CDCl_3$ ):  $\delta$  = 7.44 (s, 1H), 6.69 (s, 1H), 3.84 (s, 3H), 2.96–2.87 (m, 2H), 2.54–2.45 (m, 1H), 2.43–2.37 (m, 1H), 2.29–2.22 (m, 1H), 2.13 (dt,  $J$  = 18.8, 8.7 Hz, 1H), 2.08–2.00 (m, 2H), 1.98–1.93 (m, 1H), 1.67–1.55 (m, 2H),

1.54–1.41 (m, 4H), 0.89 (s, 3H).  $^{13}\text{C-NMR}$  (100 MHz,  $\text{CDCl}_3$ ):  $\delta = 220.5$  ( $\text{C}_q$ ), 155.2 (q,  $^3J_{\text{C-F}} = 1.4$  Hz,  $\text{C}_q$ ), 142.1 ( $\text{C}_q$ ), 131.5 ( $\text{C}_q$ ), 124.1 (q,  $^3J_{\text{C-F}} = 5.2$  Hz, CH), 124.0 (q,  $^1J_{\text{C-F}} = 272.0$  Hz,  $\text{C}_q$ ), 116.2 (q,  $^2J_{\text{C-F}} = 30.5$  Hz,  $\text{C}_q$ ), 112.3 (CH), 55.9 ( $\text{CH}_3$ ), 50.3 (CH), 47.9 ( $\text{C}_q$ ), 43.7 (CH), 38.1 (CH), 35.8 ( $\text{CH}_2$ ), 31.4 ( $\text{CH}_2$ ), 29.8 ( $\text{CH}_2$ ), 26.2 ( $\text{CH}_2$ ), 25.8 ( $\text{CH}_2$ ), 21.5 ( $\text{CH}_2$ ), 13.8 ( $\text{CH}_3$ ).  $^{19}\text{F-NMR}$  (376 MHz,  $\text{CDCl}_3$ ):  $\delta = -61.8$  (s). IR (ATR): 2933, 1737, 1621, 1507, 1465, 1416, 1255, 1117, 1051  $\text{cm}^{-1}$ . MS (ESI)  $m/z$  (relative intensity): 375 (100)  $[\text{M}+\text{Na}]^+$ , 353 (30)  $[\text{M}+\text{H}]^+$ . HR-MS (ESI)  $m/z$  calc. for  $\text{C}_{20}\text{H}_{24}\text{F}_3\text{O}_2$   $[\text{M}+\text{H}]^+$ : 353.1723, found: 353.1717. The analytical data correspond with those reported in the literature.<sup>[2]</sup>

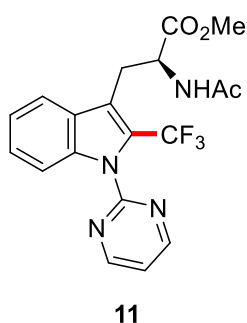

**Methyl (S)-2-acetamido-3-(1-(pyrimidin-2-yl)-2-(trifluoromethyl)-1H-indol-3-yl)propanoate (11)**

The general procedure B was followed using Tryptophan derivative (85 mg, 0.25 mmol) at 23 °C for 16 h. Purification by column chromatography on silica gel (*n*-hexane/EtOAc = 1:1) yielded **11** (65 mg, 64%) as a colorless oil.  $^1\text{H-NMR}$  (300 MHz,  $\text{CDCl}_3$ ):  $\delta = 8.88$  (d,  $J = 4.8$  Hz, 2H), 8.01 (dt,  $J = 8.5, 1.0$  Hz, 1H), 7.84 (d,  $J = 7.6$  Hz, 1H), 7.42 (ddd,  $J = 8.5, 7.1, 1.2$  Hz, 1H), 7.36–7.27 (m, 2H), 6.22 (d,  $J = 7.9$  Hz, 1H), 5.02 (dt,  $J = 7.9, 6.4$  Hz, 1H), 3.68 (s, 3H), 3.59–3.50 (m, 2H), 2.01 (s, 3H).  $^{13}\text{C-NMR}$  (100 MHz,  $\text{CDCl}_3$ ):  $\delta = 172.0$  ( $\text{C}_q$ ), 169.8 ( $\text{C}_q$ ), 158.5 (CH), 157.2 ( $\text{C}_q$ ), 137.0 ( $\text{C}_q$ ), 127.7 ( $\text{C}_q$ ), 126.6 (CH), 124.2 (q,  $^2J_{\text{C-F}} = 36.4$  Hz,  $\text{C}_q$ ), 122.7 (CH), 121.8 (q,  $^1J_{\text{C-F}} = 268.0$  Hz,  $\text{C}_q$ ), 120.3 (CH), 118.9 (q,  $^3J_{\text{C-F}} = 2.7$  Hz,  $\text{C}_q$ ), 118.8 (CH), 113.2 (CH), 52.43 (CH), 52.37 ( $\text{CH}_3$ ), 27.6 (q,  $^4J_{\text{C-F}} = 1.8$  Hz,  $\text{CH}_2$ ), 23.1 ( $\text{CH}_3$ ).  $^{19}\text{F-NMR}$  (282 MHz,  $\text{CDCl}_3$ ):  $\delta = -52.9$  (s). IR (ATR): 3290, 3056, 2955, 1744, 1657, 1567, 1423, 1287, 1087  $\text{cm}^{-1}$ . MS (ESI)  $m/z$  (relative intensity): 429 (100)  $[\text{M}+\text{Na}]^+$ , 407 (15)  $[\text{M}+\text{H}]^+$ . HR-MS (ESI)  $m/z$  calc. for  $\text{C}_{19}\text{H}_{18}\text{F}_3\text{N}_4\text{O}_3$   $[\text{M}+\text{H}]^+$ : 407.1326, found: 407.1321.

## Some inert examples

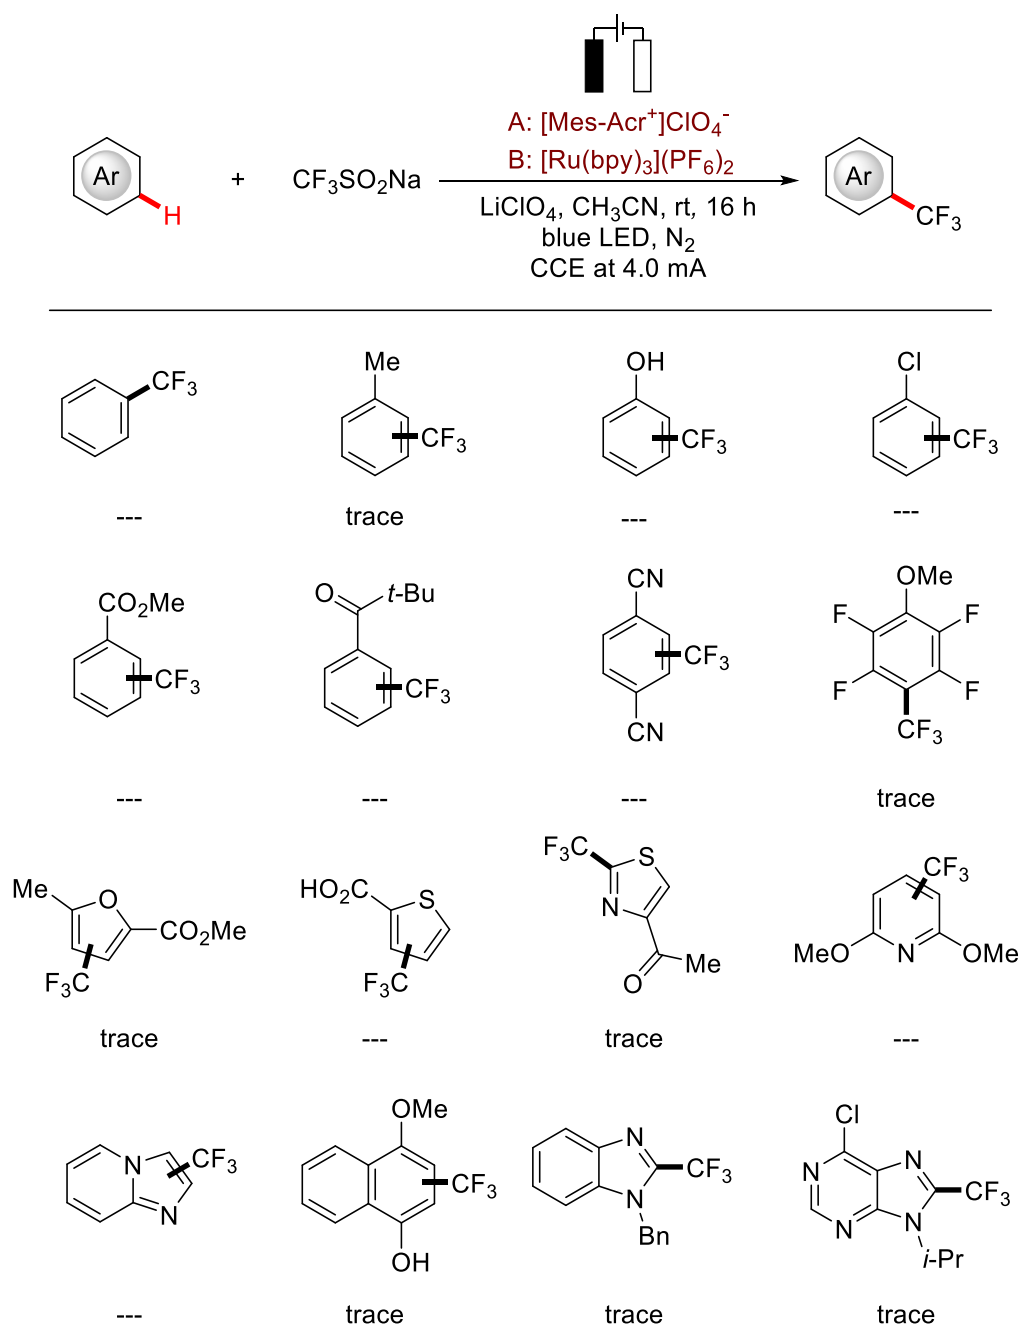

## General Procedure for the Electrophotocatalytic C–H Trifluoromethylation in Flow

A 15 mL-Schlenk tube was charged with Substrate **1a** (60 mg, 0.5 mmol, 1.0 equiv),  $\text{CF}_3\text{SO}_2\text{Na}$  **2** (156 mg, 1.0 mmol, 2.0 equiv),  $\text{LiClO}_4$  (85 mg, 0.80 mmol) and  $[\text{Mes-Acr}^+]\text{ClO}_4^-$  (5.1 mg, 5.0 mol %) and  $\text{CH}_3\text{CN}$  (10.0 mL) under  $\text{N}_2$ . The tube was sealed with a septum and connected to a balloon filled with  $\text{N}_2$ . The solution was passed through the electroflow reactor and a following transparent FEP tube (ID 0.5 mm, OD 1/16") by a peristaltic pump with a flow speed of 1.0 mL/min. Ca. 20 cm of the FEP tube were irradiated. The electrophotocatalysis was performed at 23 °C with a constant current of 4.0 mA maintained for 12 h under visible light irradiation ( $2 \times$  Kessil A360N lamp). Graphite felt was washed by pumping through additional 10 mL of methanol. After dismantling the reactor, the graphite felt anode was washed with  $\text{CH}_2\text{Cl}_2$  ( $3 \times 20$  mL) in an ultrasonic bath. Evaporation of the solvents and subsequent column chromatography on silica gel (pentane) afforded the corresponding products **3a** (71 mg, 76%). With 2 mol % of  $[\text{Ru}(\text{bipy})_3](\text{PF}_6)_2$  (**B**) as the catalyst, **3a** was obtained in 15% yield.

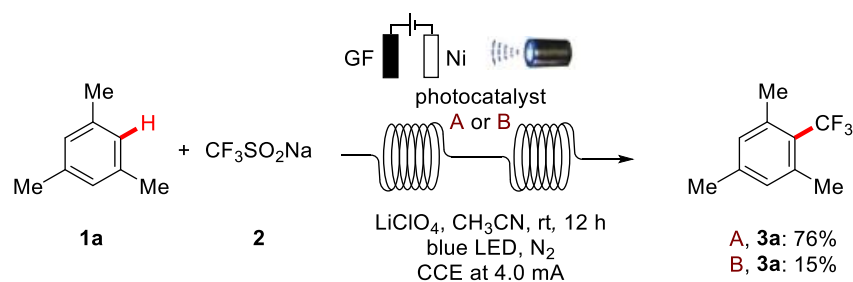

### Description of the employed electro-flow-reactor:

Electrocatalysis in flow was designed based on a commercial IKA ElectraSyn flow. The nickel cathode **A** and gasket **D** were used directly. Turbulence promoter **B** and anode slot **E** for the graphite felt anode **C** were made from polytetrafluoroethylene (PTFE).

**Flow Reactor Compartments:** **A:** nickel cathode (Teflon base); **B:** turbulence promoter; **C:** graphite felt (1.9 cm  $\times$  5.9 cm  $\times$  0.6 cm); **D:** gasket; **E:** slot for graphite felt (Teflon base).

**3D-explosion drawing of the flow cell setup:**

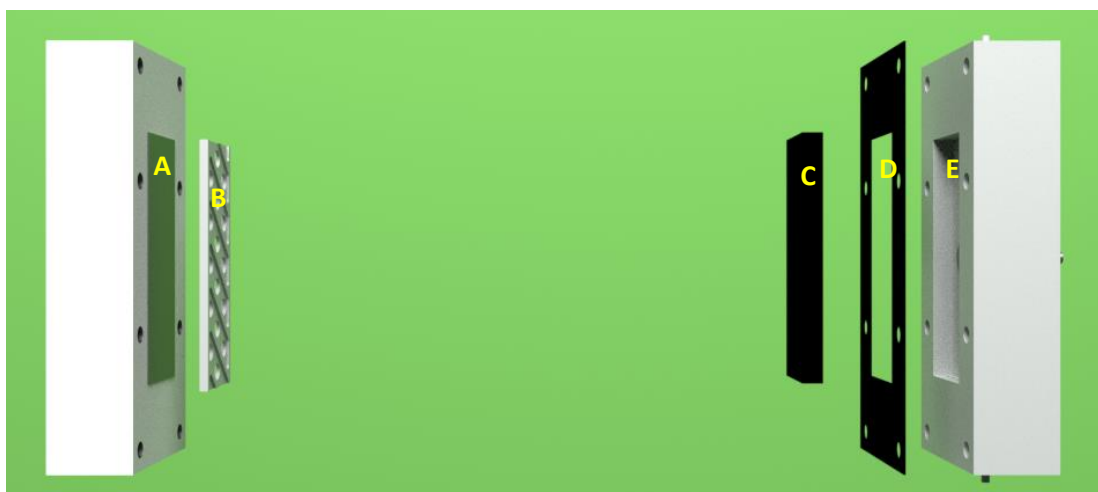

**Dimensions of B:** length: 5.7 cm. width: 1.9 cm; thickness: 0.2 cm (0.1 cm).

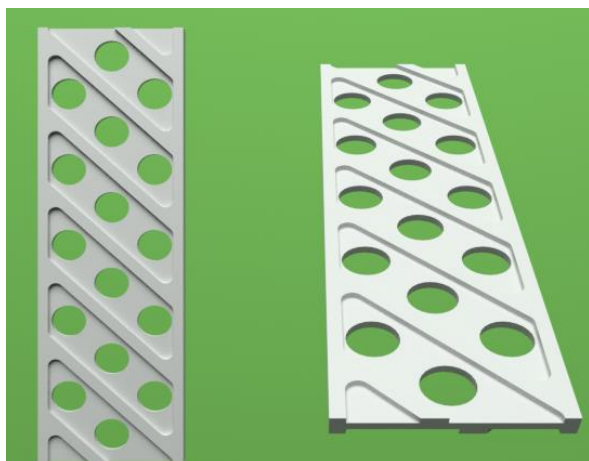

For further details of the electro-flow-reactor components, please see our recently published work.<sup>[5]</sup>

## On-Line NMR Monitoring in Flow

The  $^{19}\text{F}$  and  $^1\text{H}$  NMR spectroscopy experiments in flow were performed on a Magritek Spinsolve 60<sup>ULTRA</sup> (from Magritek GmbH, Germany) with the reaction monitoring kit supplied by the manufacturer. For pumping the solution to the spectrometer, an Ismatec REGLO Digital MS-2/12 (ISM 596) peristaltic pump was employed. The flow rate was 0.4 mL/min.

**Reaction A:** A 15 mL-Schlenk tube was charged with Substrate **1a** (60 mg, 0.375 mmol, 1.0 equiv),  $\text{CF}_3\text{SO}_2\text{Na}$  **2** (156 mg, 0.75 mmol, 2.0 equiv),  $\text{LiClO}_4$  (63 mg, 0.59 mmol) and  $[\text{Mes-Acr}^+]\text{ClO}_4^-$  (5.1 mg, 5.0 mol %) and  $\text{CH}_3\text{CN}$  (8.0 mL) under  $\text{N}_2$ . The tube was sealed with a septum and connected to a balloon filled with  $\text{N}_2$ . The solution was pumped to the NMR spectrometer by a peristaltic pump with a flow speed of 0.4 mL/min. The electrophotocatalysis was performed at 23 °C with a constant current of 4.0 mA maintained for 12 h under visible light irradiation ( $2 \times$  Kessil A360N lamp). Subsequently the reaction yield was determined by  $^1\text{H}$  NMR with  $\text{CH}_2\text{Br}_2$  as internal standard and the obtained value employed for calibration of the NMR spectra recorded in flow.

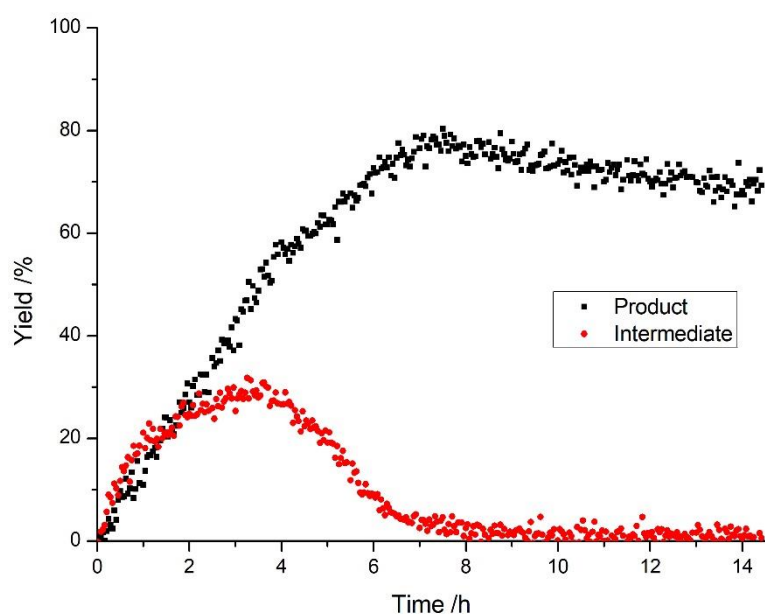

**Figure S-2** Reaction profile of reaction A determined by  $^{19}\text{F}$  NMR spectroscopic monitoring in flow.



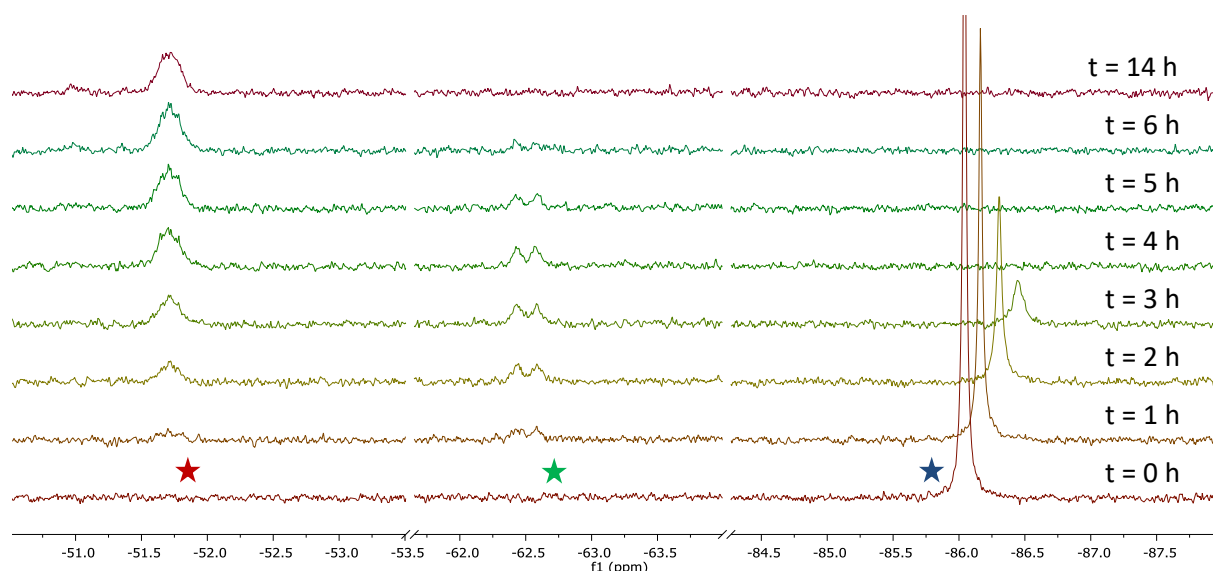

**Figure S-3**  $^{19}\text{F}$  NMR spectra recorded in flow from reaction mixture A at selected times (★: Product, ★: Intermediate, ★:  $\text{NaSO}_2\text{CF}_3$ ).

**Reaction B:** In a second experiment a 15 mL-Schlenk tube was charged with Substrate **1a** (60 mg, 0.5 mmol, 1.0 equiv),  $\text{CF}_3\text{SO}_2\text{Na}$  **2** (156 mg, 1.0 mmol, 2.0 equiv),  $\text{LiClO}_4$  (84.4 mg, 0.80 mmol) and  $[\text{Mes-Acr}^+]\text{ClO}_4^-$  (5.1 mg, 5.0 mol %) and  $\text{CH}_3\text{CN}$  (8.0 mL) under  $\text{N}_2$ . The tube was sealed with a septum and connected to a balloon filled with  $\text{N}_2$ . The solution was pumped to the NMR spectrometer by a peristaltic pump with a flow speed of 0.4 mL/min. The electrophotocatalysis was performed at 23 °C with a constant current of 4.0 mA maintained for 12 h under visible light irradiation ( $2 \times$  Kessil A360N lamp). Subsequently the reaction yield was determined by  $^1\text{H}$  NMR with  $\text{CH}_2\text{Br}_2$  as internal standard and the obtained value employed for calibration of the NMR spectra recorded in flow.

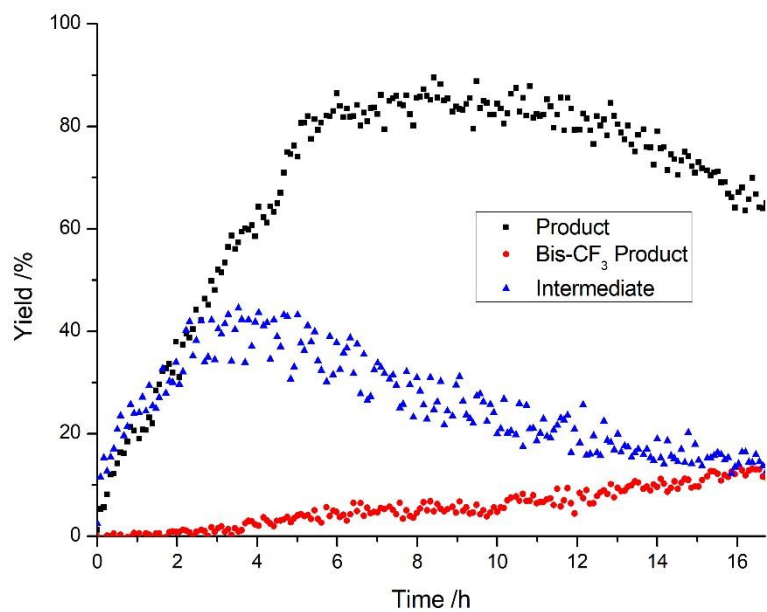

**Figure S-4** Reaction profile of reaction B determined by  $^{19}\text{F}$  NMR spectroscopic monitoring in flow.

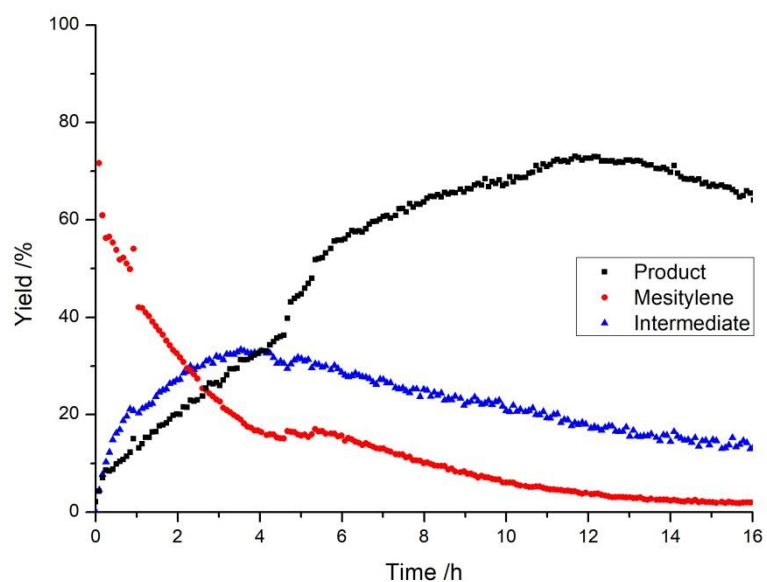

**Figure S-5** Reaction profile of reaction B determined by  $^1\text{H}$  NMR spectroscopic monitoring in flow.

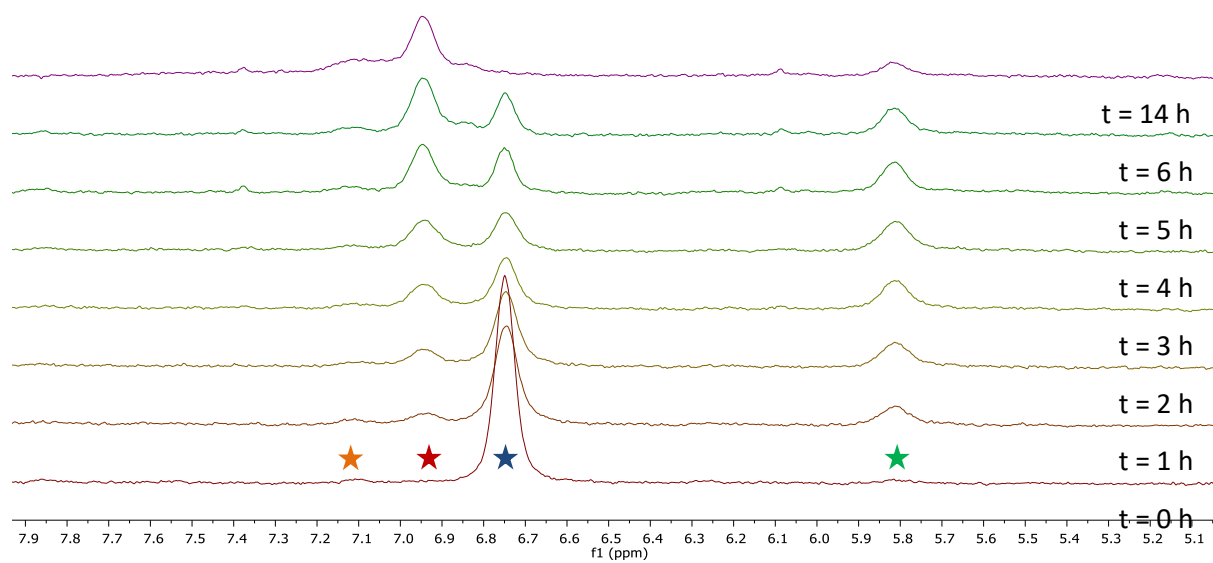

**Figure S-6** <sup>1</sup>H NMR spectra recorded in flow from reaction mixture B at selected times (★: Bis-CF<sub>3</sub>-Product, ★: Product, ★: Mesitylene, ★: Intermediate).

## Radical trap experiments

### Radical trap experiments

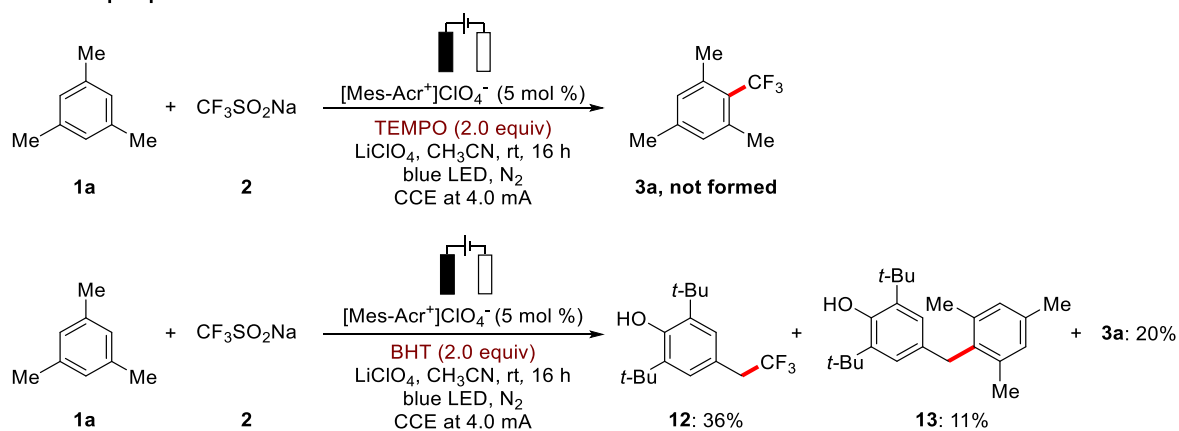

The electrophotocatalysis was carried out in an undivided cell, with a GF anode (10 mm × 15 mm × 6 mm) and a Pt cathode (10 mm × 15 mm × 0.25 mm). **1a** (30 mg, 0.25 mmol), CF<sub>3</sub>SO<sub>2</sub>Na (**2**, 78 mg, 0.50 mmol), LiClO<sub>4</sub> (42 mg, 0.40 mmol), [Mes-Acr<sup>+</sup>]ClO<sub>4</sub><sup>-</sup> (5.1 mg, 5.0 mol %) and BHT (110 mg, 0.50 mmol) were dissolved in CH<sub>3</sub>CN (4.0 mL) under N<sub>2</sub>. The electrophotocatalysis was performed at 23 °C with a constant current of 4.0 mA maintained for 16 h under visible light irradiation (2 × Kessil A360N). The GF anode was washed with CH<sub>2</sub>Cl<sub>2</sub> (3 × 10 mL) in an ultrasonic cleaner. Evaporation of the solvent and subsequent column chromatography on silica gel afforded the corresponding products **12** (52 mg, 36% yield based on **2**) as a colorless oil, **13** (9.3 mg, 11%) as a white solid. M. p.: 133–135 °C, and **3a** (9.4 mg, 20%) (eluent: *n*-hexane → *n*-hexane/EtOAc = 25:1).

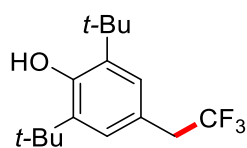

**12**

### 2,6-Di-*tert*-butyl-4-(2,2,2-trifluoroethyl)phenol (**12**)

<sup>1</sup>H-NMR (400 MHz, CDCl<sub>3</sub>): δ = 7.04 (s, 1H), 5.20 (s, 1H), 3.25 (q, *J* = 11.0 Hz, 2H), 1.42 (s, 18H). <sup>13</sup>C-NMR (100 MHz, CDCl<sub>3</sub>): δ = 153.6 (C<sub>q</sub>), 136.1 (CH), 126.0 (q, <sup>1</sup>*J*<sub>C-F</sub> = 276.9 Hz, C<sub>q</sub>), 126.8 (C<sub>q</sub>), 120.9 (q, <sup>3</sup>*J*<sub>C-F</sub> = 2.9 Hz, C<sub>q</sub>), 40.0 (q, <sup>2</sup>*J*<sub>C-F</sub> = 29.4 Hz, CH<sub>2</sub>), 34.3 (C<sub>q</sub>), 30.2 (CH<sub>3</sub>). <sup>19</sup>F-NMR (376 MHz, CDCl<sub>3</sub>): δ = -66.2 (s). IR (ATR): 3644, 2955, 2924, 1460, 1436, 1359, 1258, 1134, 1086 cm<sup>-1</sup>. MS (EI) *m/z* (relative intensity): 288 (30) [M]<sup>+</sup>, 273 (100) [M-

$\text{CH}_3]^+$ . HR-MS (EI)  $m/z$  calc. for  $\text{C}_{16}\text{H}_{23}\text{F}_3\text{O}$   $[\text{M}]^+$ : 288.1696, found: 288.1700. The analytical data correspond with those reported in the literature.<sup>[6]</sup>

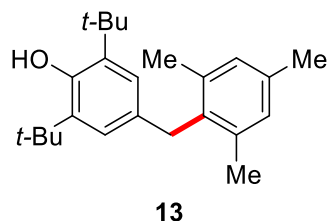

### 2,6-Di-*tert*-butyl-4-(2,4,6-trimethylbenzyl)phenol (13)

$^1\text{H-NMR}$  (400 MHz,  $\text{CDCl}_3$ ):  $\delta$  = 6.86 (s, 2H), 6.83 (s, 2H), 4.97 (s, 1H), 3.90 (s, 2H), 2.27 (s, 3H), 2.24 (s, 6H), 1.36 (s, 18H).  $^{13}\text{C-NMR}$  (100 MHz,  $\text{CDCl}_3$ ):  $\delta$  = 151.6 ( $\text{C}_q$ ), 136.8 ( $\text{C}_q$ ), 135.6 ( $\text{C}_q$ ), 135.2 ( $\text{C}_q$ ), 134.6 ( $\text{C}_q$ ), 130.5 ( $\text{C}_q$ ), 128.8 (CH), 124.4 (CH), 34.5 ( $\text{CH}_2$ ), 34.2 ( $\text{C}_q$ ), 30.3 ( $\text{CH}_3$ ), 20.9 ( $\text{CH}_3$ ), 20.2 ( $\text{CH}_3$ ). IR (ATR): 3645, 2955, 2915, 1614, 1434, 1361, 1232, 1153, 1120, 1026  $\text{cm}^{-1}$ . MS (ESI)  $m/z$  (relative intensity): 337 (100)  $[\text{M-H}]^+$ . HR-MS (ESI)  $m/z$  calc. for  $\text{C}_{24}\text{H}_{33}\text{O}$   $[\text{M-H}]^+$ : 337.2526, found: 337.2525. The analytical data correspond with those reported in the literature.<sup>[7]</sup>

## Light on/off experiments

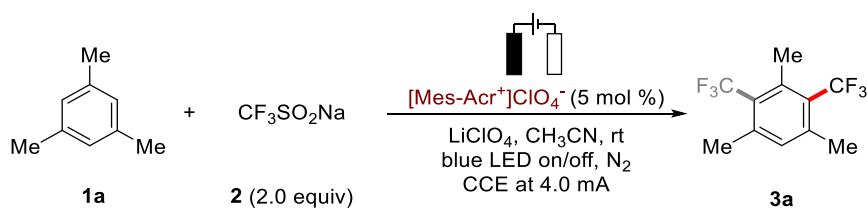

| Time (h)     | 0 | 1  | 2   | 3  | 4   | 5  | 6   | 7  | 8   | 9  | 10  |
|--------------|---|----|-----|----|-----|----|-----|----|-----|----|-----|
| Light on/off | 0 | on | off | on | off | on | off | on | off | on | off |
| Yield (%)    | 0 | 23 | 23  | 26 | 26  | 28 | 28  | 29 | 29  | 30 | 30  |

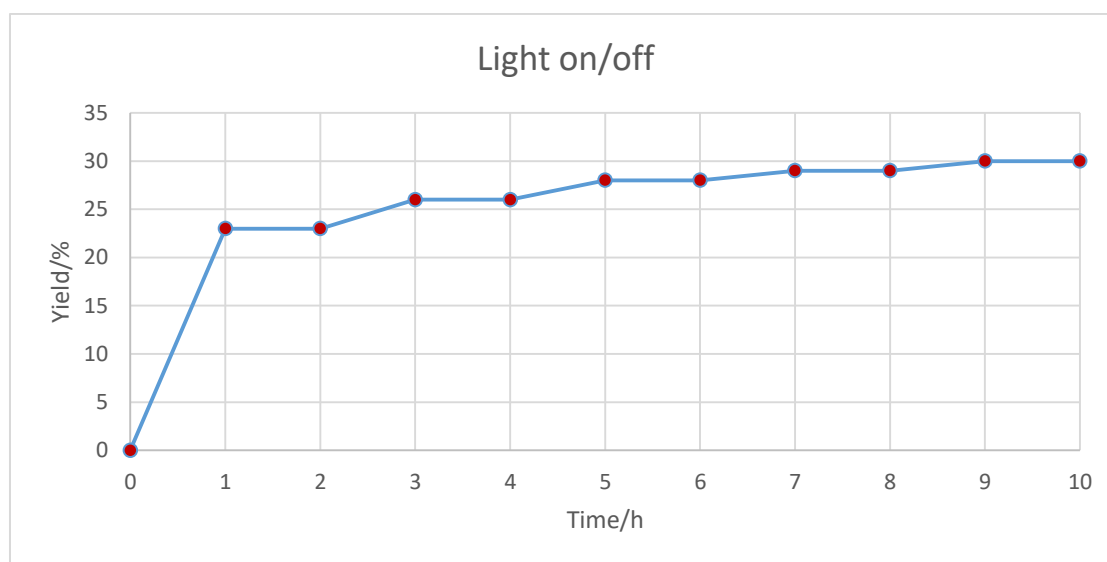

**Figure S-7.** Light on/off experiments

The electrocatalysis was carried out in an undivided cell, with a GF anode (10 mm  $\times$  15 mm  $\times$  6 mm) and a Pt cathode (10 mm  $\times$  15 mm  $\times$  0.25 mm). **1a** (30 mg, 0.25 mmol),  $\text{CF}_3\text{SO}_2\text{Na}$  (**2**, 78 mg, 0.50 mmol),  $\text{LiClO}_4$  (42 mg, 0.40 mmol), and  $[\text{Mes-Acr}^+]\text{ClO}_4^-$  (5.1 mg, 5.0 mol %) were dissolved in  $\text{CH}_3\text{CN}$  (4.0 mL) under  $\text{N}_2$ . The electrocatalysis was performed at 23  $^\circ\text{C}$  with a constant current of 4.0 mA under visible light irradiation (2  $\times$  Kessil A360N) at given time intervals. The yield of **3a** was determined by GC/MS analysis of the crude mixture with *n*-dodecane as the internal standard.

## Electricity on/off experiments

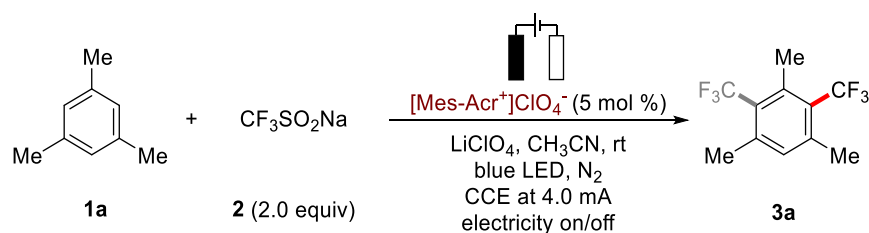

|                    |   |    |     |    |     |    |     |    |     |    |     |
|--------------------|---|----|-----|----|-----|----|-----|----|-----|----|-----|
| Time (h)           | 0 | 1  | 2   | 3  | 4   | 5  | 6   | 7  | 8   | 9  | 10  |
| Electricity on/off | 0 | on | off | on | off | on | off | on | off | on | off |
| Yield (%)          | 0 | 23 | 25  | 36 | 38  | 45 | 46  | 54 | 54  | 64 | 64  |

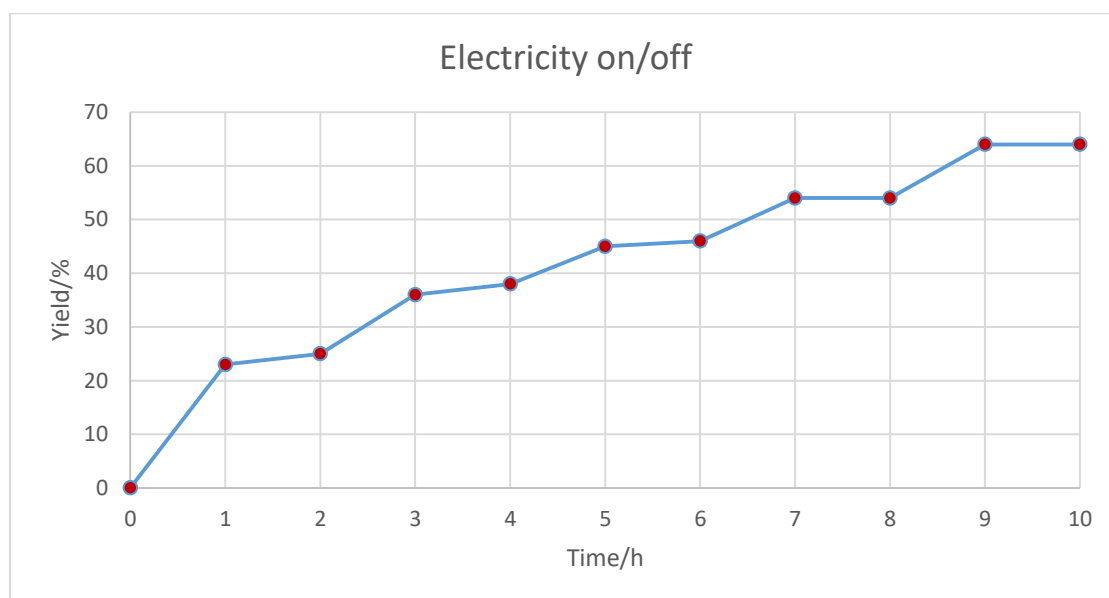

**Figure S-8.** Electricity on/off experiments

The electrophotocatalysis was carried out in an undivided cell, with a GF anode (10 mm  $\times$  15 mm  $\times$  6 mm) and a Pt cathode (10 mm  $\times$  15 mm  $\times$  0.25 mm). **1a** (30 mg, 0.25 mmol),  $\text{CF}_3\text{SO}_2\text{Na}$  (**2**, 78 mg, 0.50 mmol),  $\text{LiClO}_4$  (42 mg, 0.40 mmol), and  $[\text{Mes-Acr}^+]\text{ClO}_4^-$  (5.1 mg, 5.0 mol %) were dissolved in  $\text{CH}_3\text{CN}$  (4.0 mL) under  $\text{N}_2$ . The electrophotocatalysis was performed at 23  $^\circ\text{C}$  with a constant current of 4.0 mA under visible light irradiation ( $2 \times$  Kessil A360N) at given time intervals. The yield of **3a** was determined by GC/MS analysis of the crude mixture with *n*-dodecane as the internal standard.

## Estimation of quantum yield

The quantum yield  $\Phi$  is defined as the ratio between the number or rate of desired photochemical transformations and the number or rate of absorbed photons. In our reaction, the reaction velocity  $v_r$  is driven by electric current, which for a 2-electron process at ideally 100% faradaic yield corresponds to a maximum value of:

$$v_r = \frac{4 \text{ mA}}{2 F} = \frac{0.004 \text{ C s}^{-1}}{2 \times 96485 \text{ C mol}^{-1}} \leq 2.07 \times 10^{-8} \text{ mol s}^{-1}$$

The photon flux was determined using the well-established Hatchard-Parker actinometer.<sup>[7]</sup> Two solutions were prepared for the quantification of Fe(II) produced by photochemical decomposition of potassium ferrioxalate:

Ferrioxalate solution F: 124 mg (0.25 mmol) of commercially obtained  $\text{K}_3[\text{Fe}(\text{C}_2\text{O}_4)_3]$  were dissolved in approx. 20 mL of distilled water. Subsequently, 250 mg conc.  $\text{H}_2\text{SO}_4$  (2.5 mmol) were added and the solution was topped with distilled water to a total volume of 25 mL.

Phenanthroline buffer P: 150 mg (0.83 mmol) phenanthroline and 2.050 g (25 mmol) NaOAc were dissolved in approx. 40 mL of distilled water. Subsequently, 0.50 mL  $\text{H}_2\text{SO}_4$  (9 mmol) were added and the solution was topped with distilled water to a total volume of 50 mL.

The measurement was performed in the typical reaction setup: A Schlenk-tube, equipped with a magnetic stirring bar and a rubber septum with electrode inlets was charged with 4 mL of solution **F**. The sample was irradiated with blue light for 20 s ( $2 \times$  Kessil A360N). Subsequently, a 1/40 aliquot (100  $\mu\text{L}$ ) was taken and dissolved in 10 mL of solution **P** to obtain complex solution C<sub>I</sub>. This procedure was repeated with a non-irradiated sample to obtain complex solution C<sub>0</sub>.

The quantification of Fe(II) amount relies on the phenanthroline complex, which possesses an absorptivity  $\varepsilon$  of  $11000 \text{ L}\cdot\text{mol}^{-1}\cdot\text{cm}^{-1}$  at 510 nm. UV absorbance  $A$  of **C<sub>0</sub>** was recorded as a blank. The absorbance of **C<sub>I</sub>** at 510 nm was 0.58. According to the Lambert-Beer law, this corresponds at an optical path length of  $l = 1 \text{ cm}$  to a concentration of:

$$c = \frac{A}{\varepsilon l} = \frac{0.58}{11000 \text{ L mol}^{-1} \text{ cm}^{-1} \times 1 \text{ cm}} = 5.3 \times 10^{-5} \text{ mol L}^{-1}$$

Given a dilution factor of 100 and a quantum yield of 0.86 of potassium ferrioxalate at 436 nm, the total amount of photons absorbed per second  $v_p$  in the sample is:



$$v_p = \frac{5.3 \times 10^{-5} \text{ mol L}^{-1} \times 100 \times 0.004 \text{ L}}{0.86 \times 20 \text{ s}} = 1.23 \times 10^{-6} \text{ mol s}^{-1}$$

The ratio between  $v_r$  and  $v_p$  is the estimated quantum yield:

$$\Phi = \frac{v_r}{v_p} = \frac{2.07 \times 10^{-8} \text{ mol s}^{-1}}{1.23 \times 10^{-6} \text{ mol s}^{-1}} \leq 1.7 \times 10^{-2} \text{ (1.7\%)}$$

## Fluorescence Quenching Experiments

Sample solutions were prepared in a MeCN/H<sub>2</sub>O 9:1 mixture with concentrations of 10<sup>-4</sup> M for [Mes-Acr<sup>+</sup>]<sup>+</sup>ClO<sub>4</sub><sup>-</sup>, 10<sup>-5</sup> M for [Ru(bpy)<sub>3</sub>](PF<sub>6</sub>)<sub>2</sub> and varying concentrations of quencher (**1a** or **2**). The sample solutions were degassed prior to measurement by N<sub>2</sub>-bubbling. Stern-Volmer experiments were conducted with fixed excitation wavelengths of 450 nm for [Ru(bpy)<sub>3</sub>](PF<sub>6</sub>)<sub>2</sub> and 400 nm for [Mes-Acr<sup>+</sup>]<sup>+</sup>ClO<sub>4</sub><sup>-</sup> and detection at the emission maximum of the respective analyte. Plotting of the I<sub>0</sub>/I value against the concentration of the potential quencher yielded the following graphs.

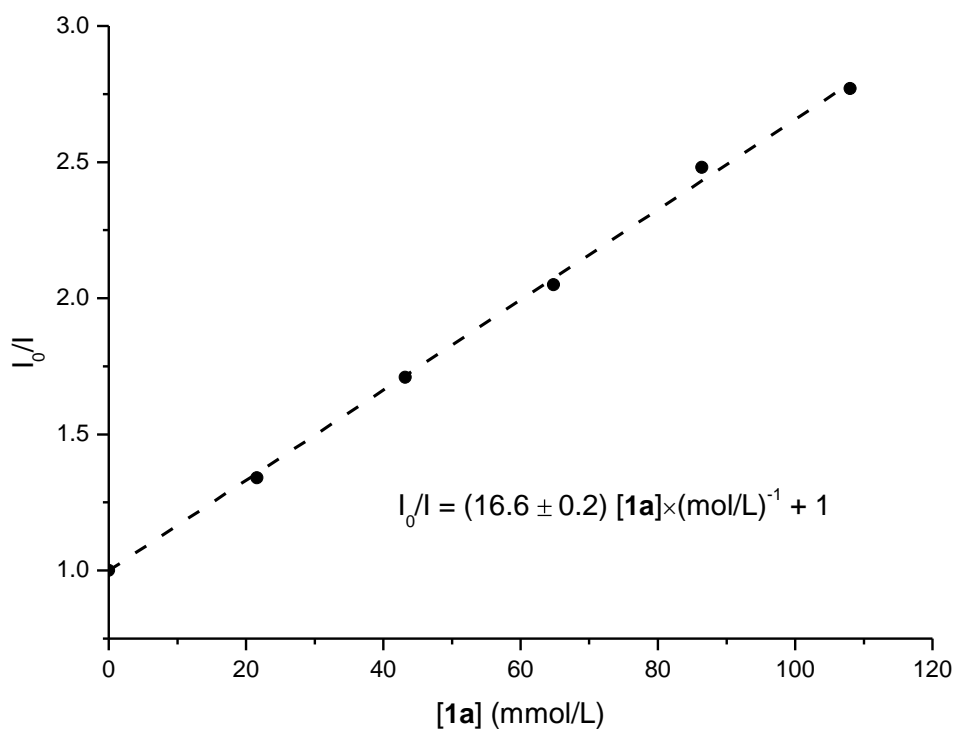

**Figure S-9.** Quenching of [Mes-Acr<sup>+</sup>]<sup>+</sup>ClO<sub>4</sub><sup>-</sup> with **1a**:

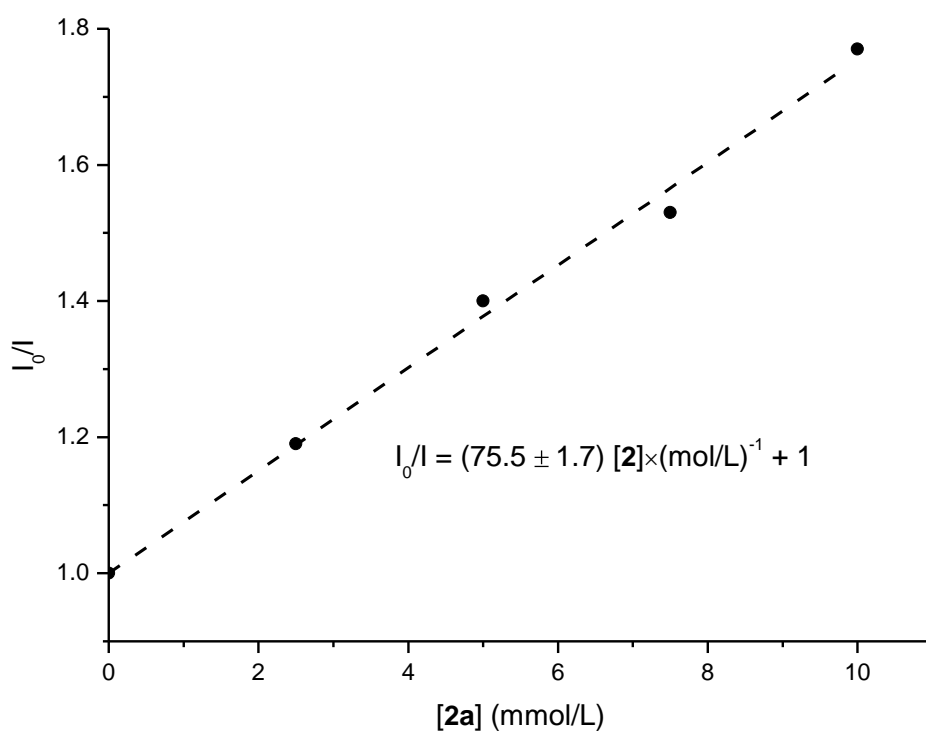

**Figure S-10.** Quenching of  $[\text{Mes-Acr}^+]\text{ClO}_4^-$  with **2**:

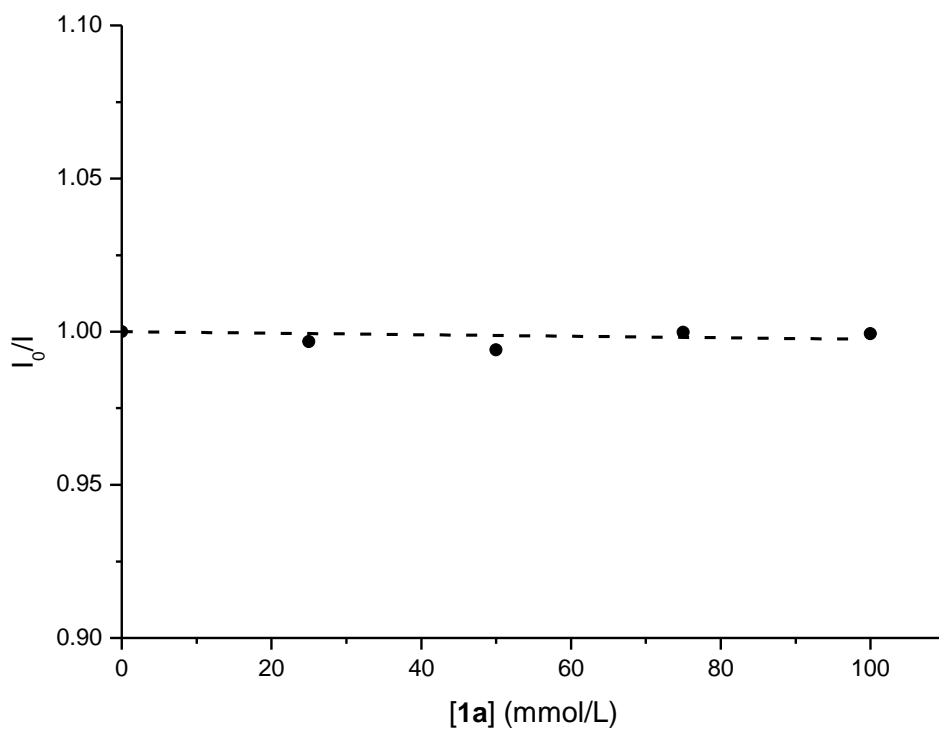

**Figure S-11.** Quenching of  $[\text{Ru}(\text{bpy})_3](\text{PF}_6)_2$  with **1a**:

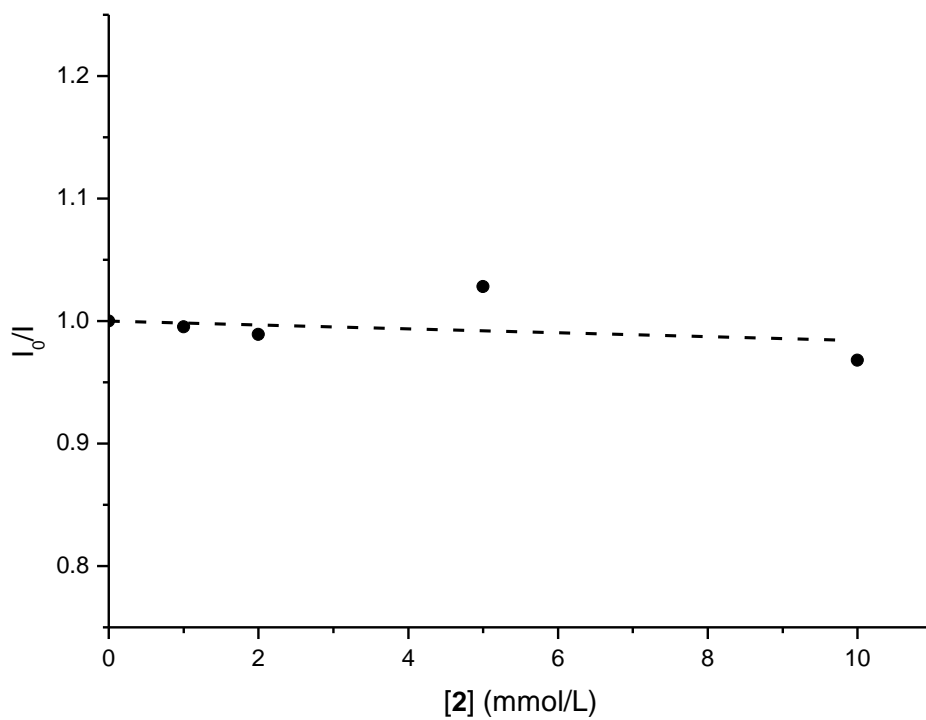

**Figure S-12.** Quenching of  $[\text{Ru}(\text{bpy})_3](\text{PF}_6)_2$  with **2**:

## GC-Headspace Detection of H<sub>2</sub>

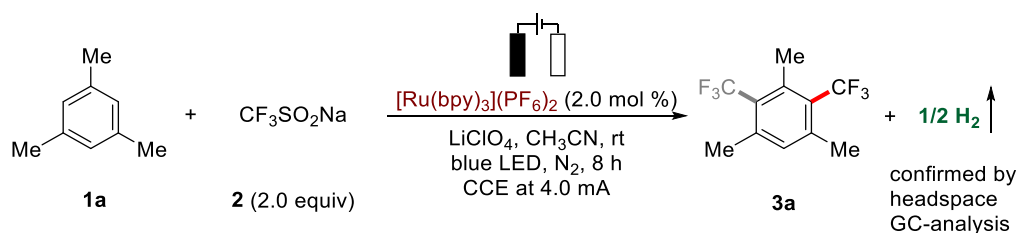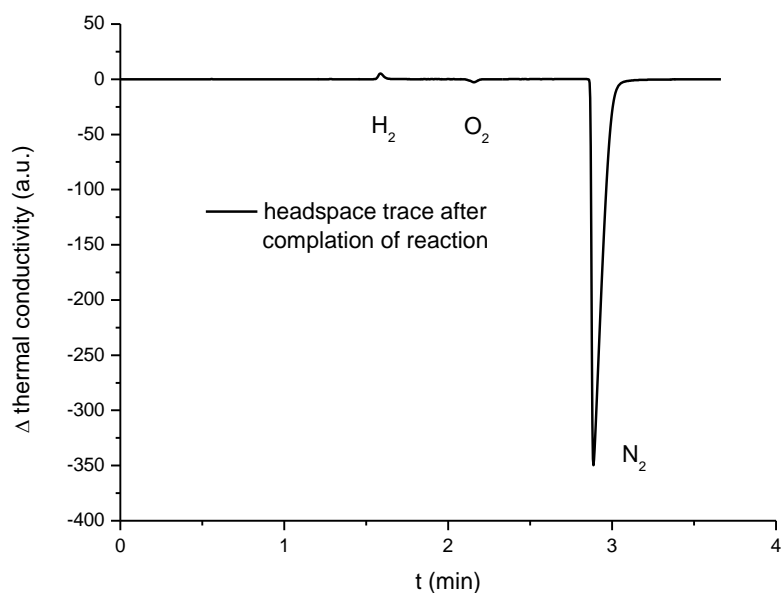

In a Schlenk tube equipped with GF anode (10 mm × 10 mm × 6 mm) and a platinum cathode (20 mm × 10 mm × 0.25 mm), **1a** (30 mg, 0.25 mmol), CF<sub>3</sub>SO<sub>2</sub>Na **2** (78 mg, 0.50 mmol), LiClO<sub>4</sub> (42 mg, 0.40 mmol) and [Ru(bpy)<sub>3</sub>](PF<sub>6</sub>)<sub>2</sub> (4.3 mg, 2.0 mol %) were dissolved in CH<sub>3</sub>CN (4.0 mL). The atmosphere was exchanged to N<sub>2</sub> and the stopcock has been closed. The electrocatalysis was performed at 23 °C with a constant current of 4.0 mA under visible light irradiation (2 × Kessil A360N). After 8 h, 1.0 mL of the headspace volume was taken for GC analysis.

## Cyclic Voltammetry

The cyclic voltammetry was carried out with a Metrohm Autolab PGSTAT204 potentiostat and Nova 2.1 software. For all experiments, a glassy carbon working electrode (disk, diameter: 3 mm), a platinum wire counter electrode and a saturated calomel reference electrode (SCE) were employed. The voltammograms were recorded in MeCN at a substrate concentration of 5.0 mmol/L and with 0.1 mol/L LiClO<sub>4</sub> as supporting electrolyte. All solutions were saturated with nitrogen gas prior to measurement. The scan rate was 100 mV/s. Blue light irradiation was accomplished by one Kessil A360N lamp, mounted in 10 cm distance from the electrochemical cell, turned up to highest intensity and lowest wave length.

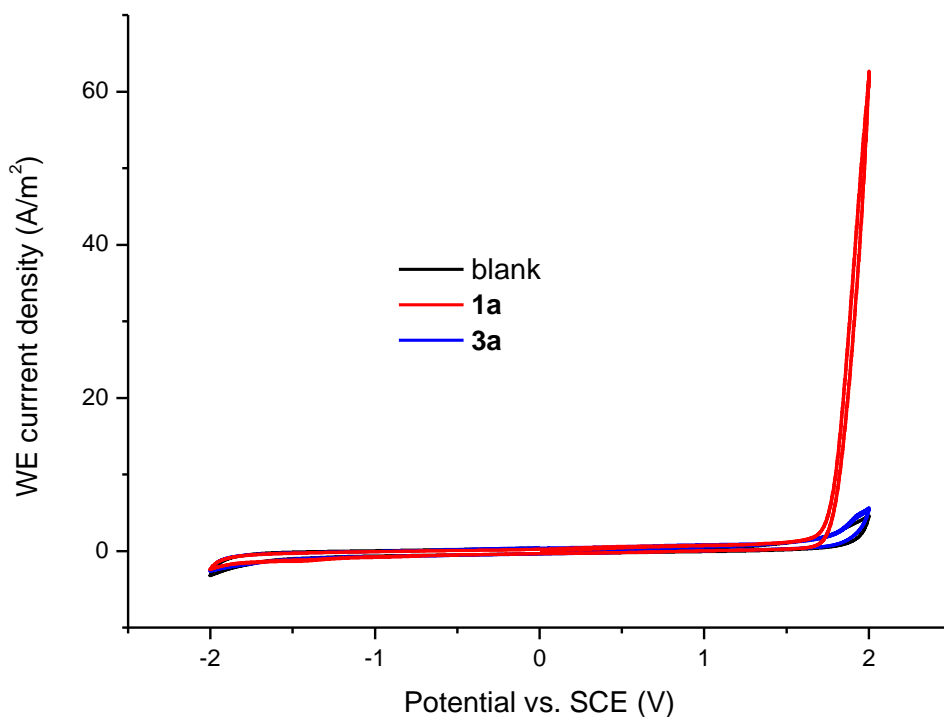

**Figure S-13.** Cyclic voltammograms at 100 mVs<sup>-1</sup>, substrates (5 mmol/L) and LiClO<sub>4</sub> (100 mmol/L) in MeCN: blank (black), **1a** (red), **3a** (blue).

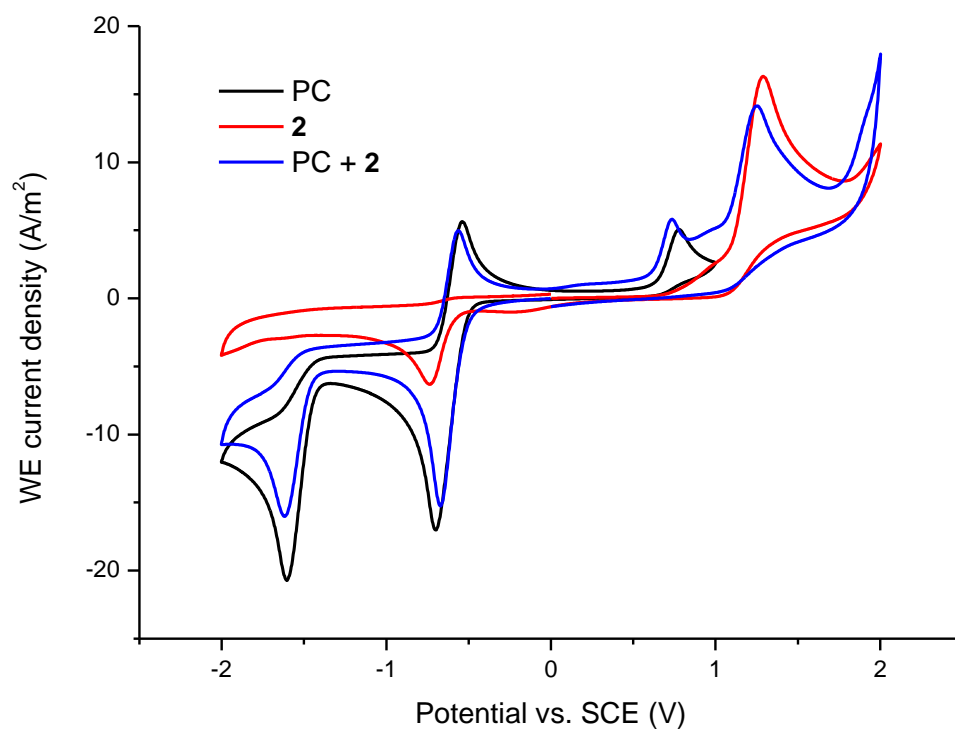

**Figure S-14.** Cyclic voltammograms at  $100 \text{ mVs}^{-1}$ , substrates (5 mmol/L) and  $\text{LiClO}_4$  (100 mmol/L) in MeCN: PC (black), **2** (red), PC + **2** (blue).

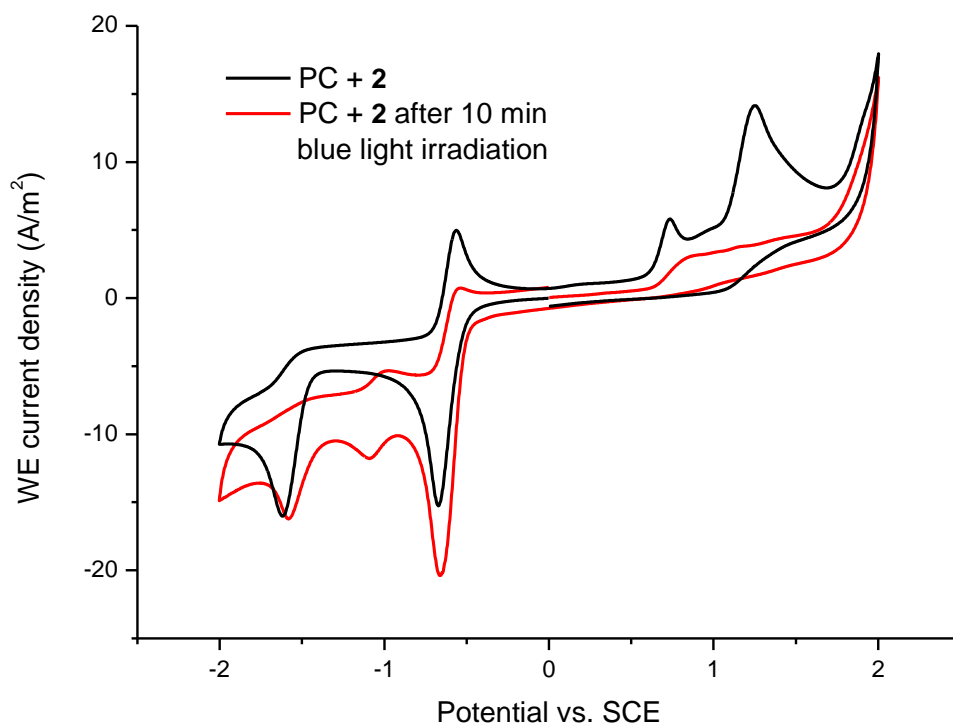

**Figure S-15.** Cyclic voltammograms at  $100 \text{ mVs}^{-1}$ , substrates (5.0 mmol/L) and  $\text{LiClO}_4$  (100 mmol/L) in MeCN: PC + **2** (black), PC + **2** after being irradiated for 10 minutes with blue light (red).



## Plausible mechanism with $[\text{Ru}(\text{bpy})_3](\text{PF}_6)_2$ as catalyst

Scheme S-1. Plausible mechanism

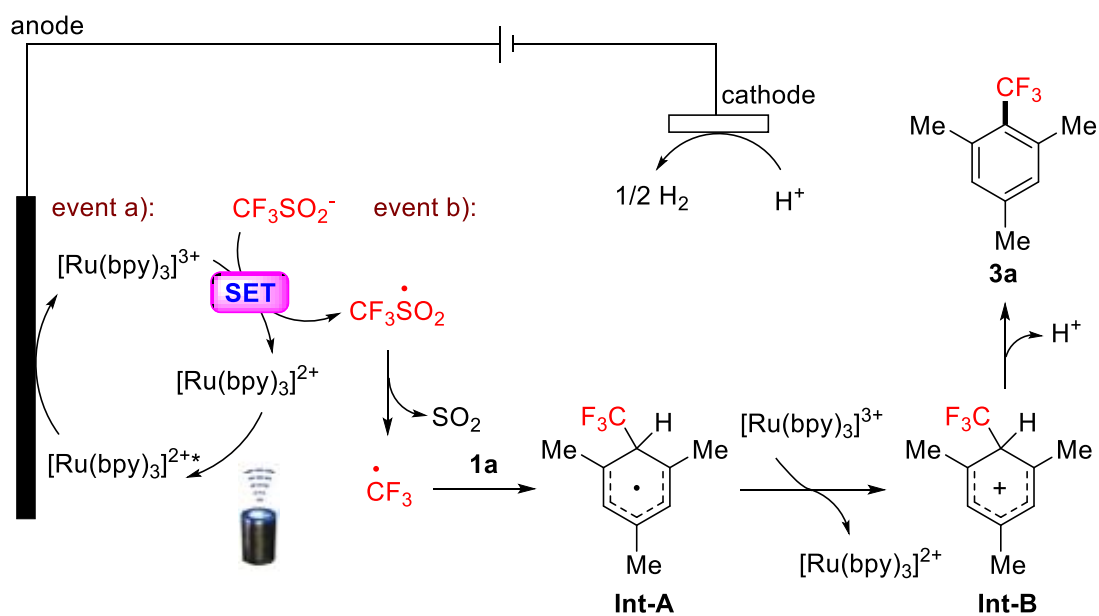

## References

- [1] Y. Ouyang, X.-H. Xu, F.-L. Qing, *Angew. Chem. Int. Ed.* **2018**, *57*, 6926–6929.
- [2] K. Natte, R. V. Jagadeesh, L. He, J. Rabeah, J. Chen, C. Taeschler, S. Ellinger, F. Zaragoza, H. Neumann, A. Brückner, M. Beller, *Angew. Chem. Int. Ed.* **2016**, *55*, 2782–2786.
- [3] Y. Deng, F. Lu, S. You, T. Xia, Y. Zheng, C. Lu, G. Yang, Z. Chen, M. Gao, A. Lei, *Chin. J. Chem.* **2019**, *37*, 817–820.
- [4] J. Lin, Z. Li, J. Kan, S. Huang, W. Su, Y. Li, *Nat. Commun.* **2017**, *8*, 14353.
- [5] W.-J. Kong, L. H. Finger, A. M. Messinis, R. Kuniyil, J. C. A. Oliveira, L. Ackermann, *J. Am. Chem. Soc.* **2019**, *141*, 17198–17206.
- [5] J. Wang, K. Sun, X. Chen, T. Chen, Y. Liu, L. Qu, Y. Zhao, B. Yu, *Org. Lett.* **2019**, *21*, 1863–1867.
- [6] I. G. Arzamanova, I. P. Romm, Y. K. Tovbin, E. N. Gur'yanova, E. A. Gurvich, A. I. Rybak, *Zh. Org. Khim.* **1979**, *49*, 672–675.
- [7] a) C. A. Parker, *Proc. R. Soc. Lond. A* **1953**, *220*, 104–116; b) C. G. Hatchard, C. A. Parker, *Proc. R. Soc. Lond. A* **1956**, *235*, 518–536.

# $^1\text{H}$ -, $^{13}\text{C}$ - and $^{19}\text{F}$ -NMR Spectra

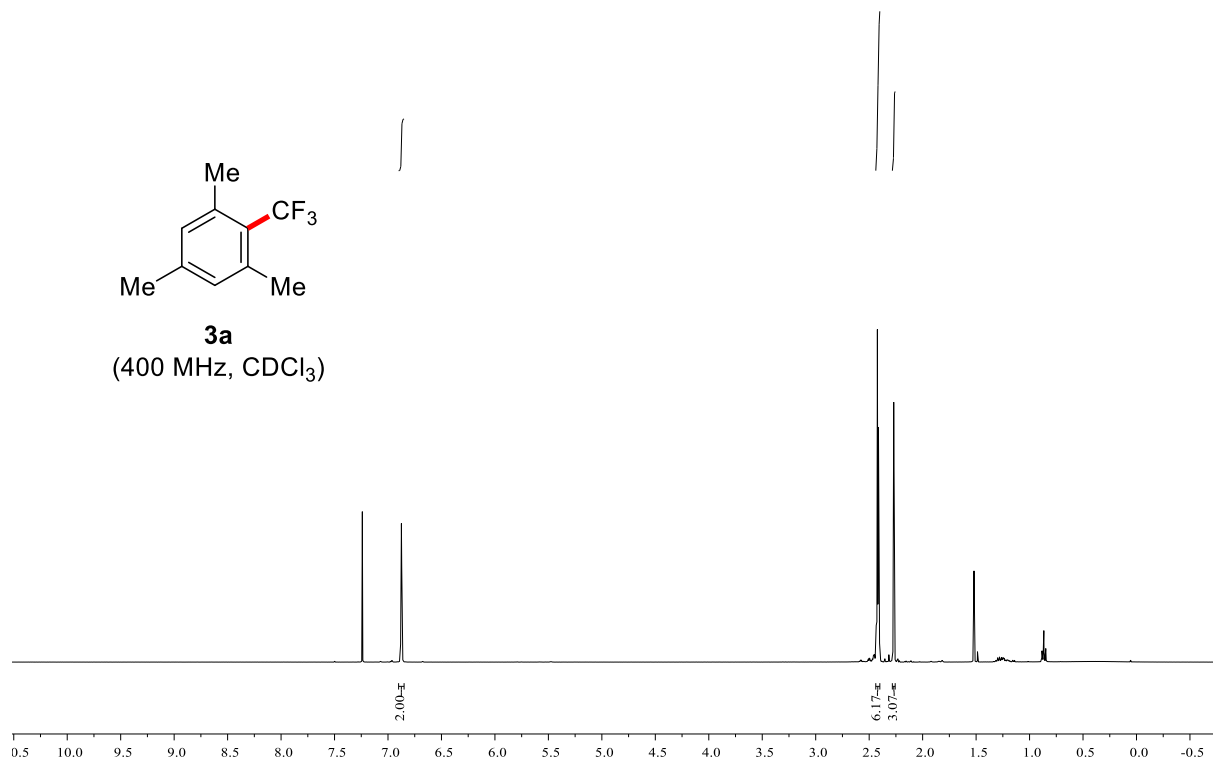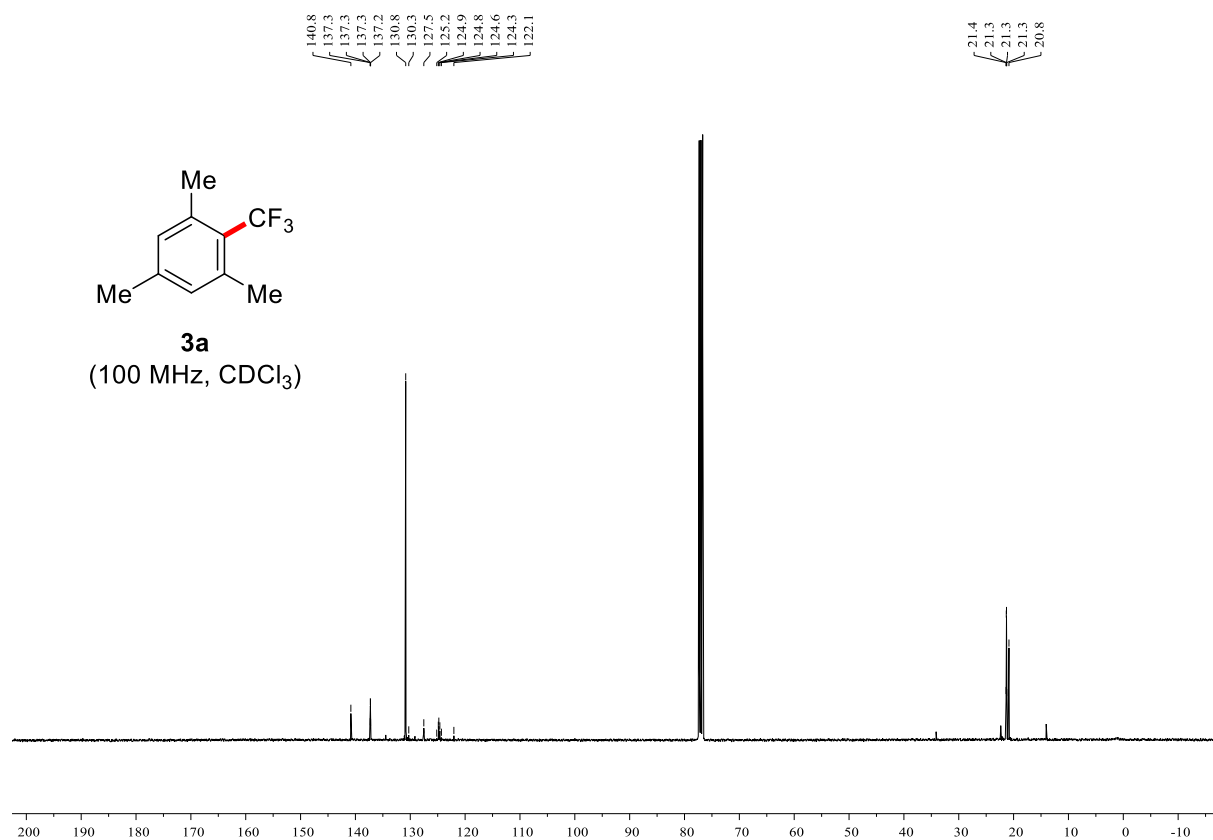

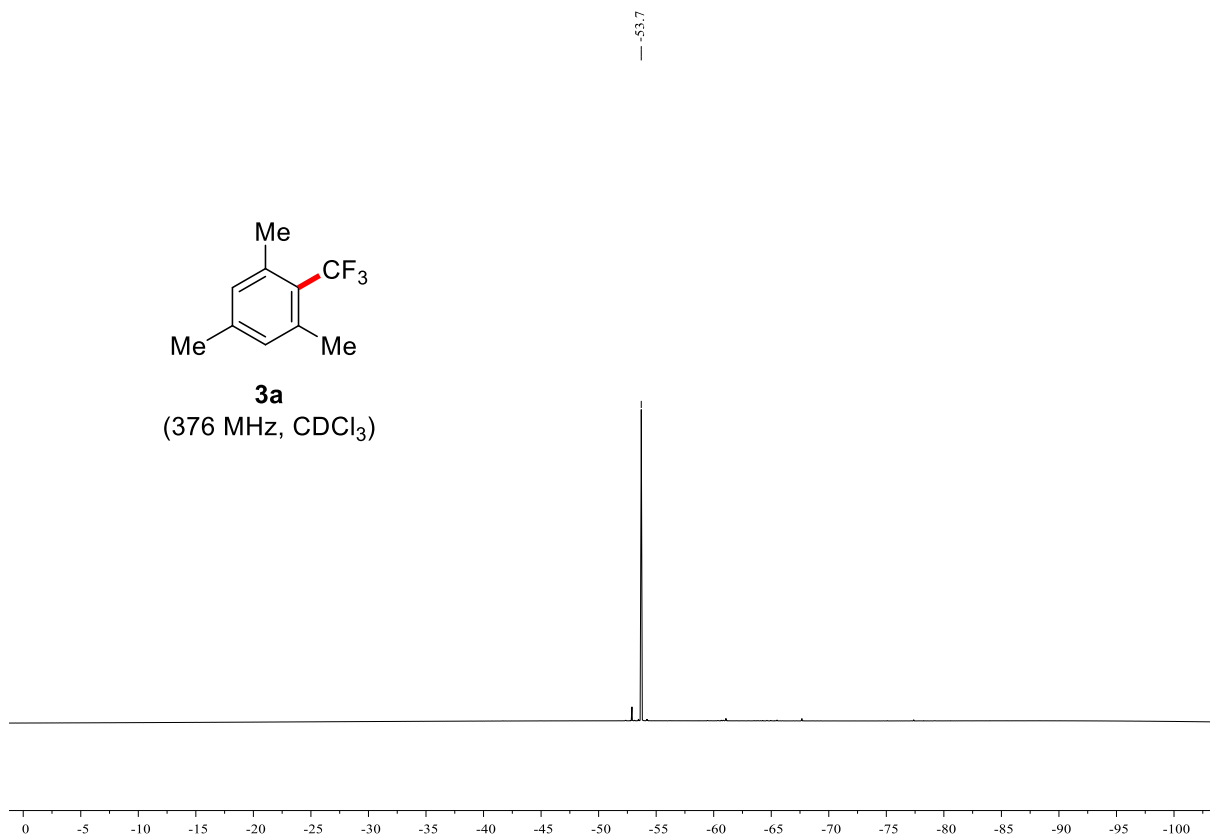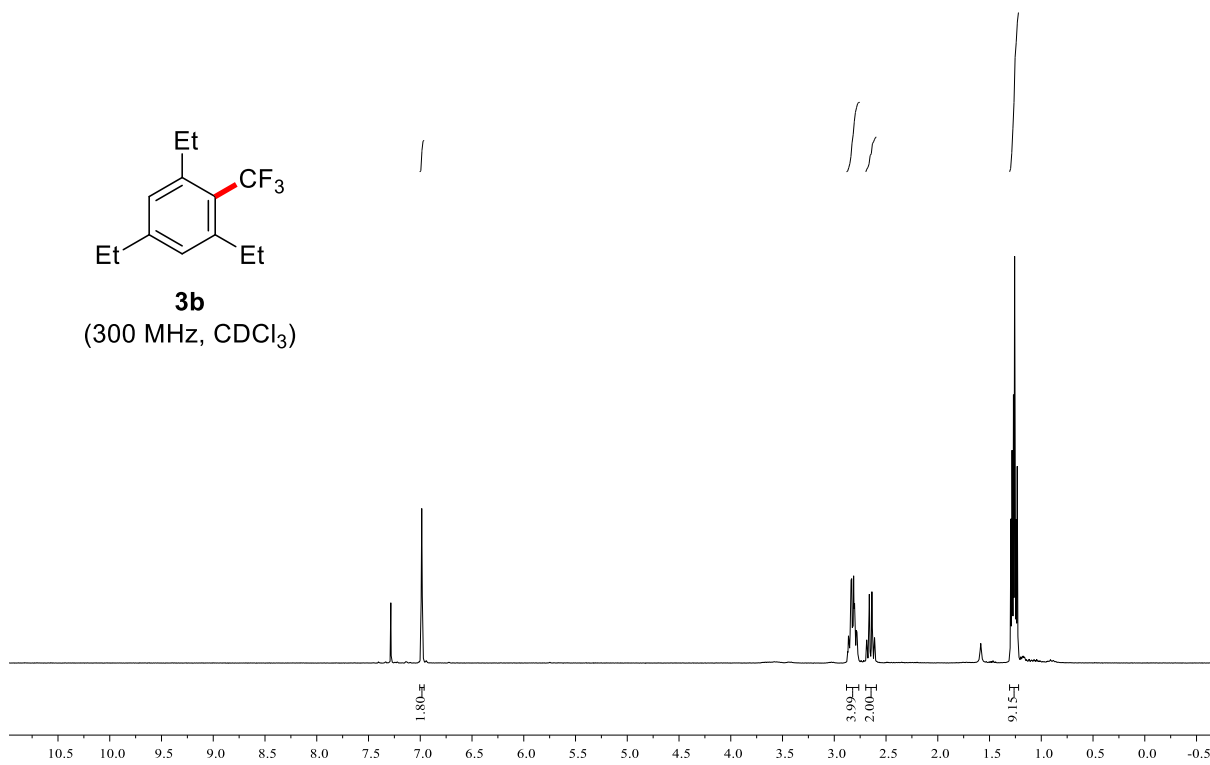

147.3  
143.9  
143.9  
143.9  
130.3  
128.5  
127.5  
124.8  
124.1  
123.8  
123.5  
123.2  
122.1

28.4  
28.0  
28.0  
27.9  
16.6  
16.6  
15.1

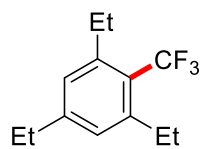

**3b**  
(100 MHz, CDCl<sub>3</sub>)

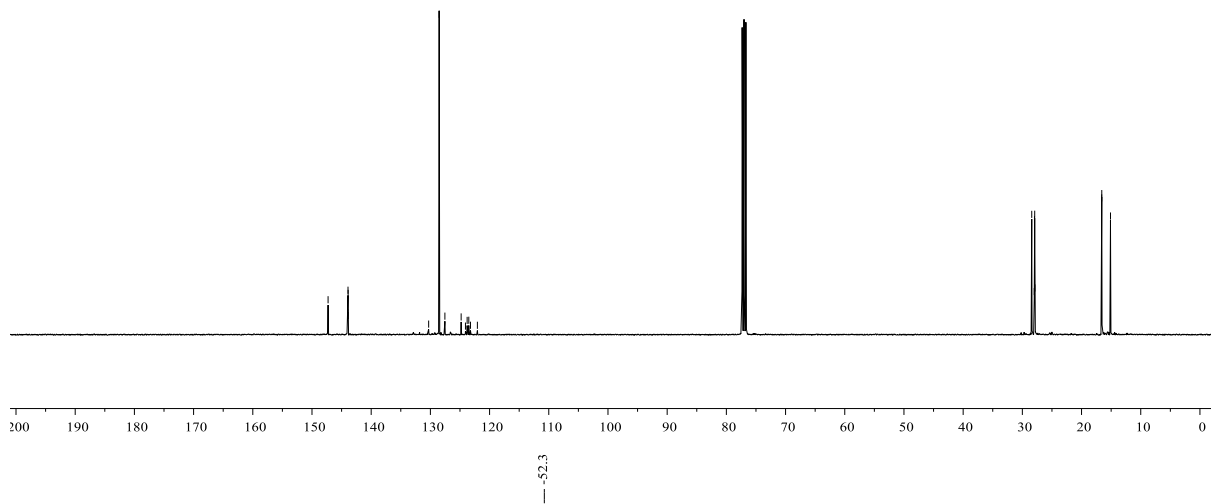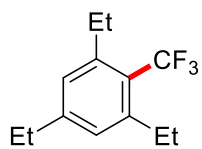

**3b**  
(282 MHz, CDCl<sub>3</sub>)

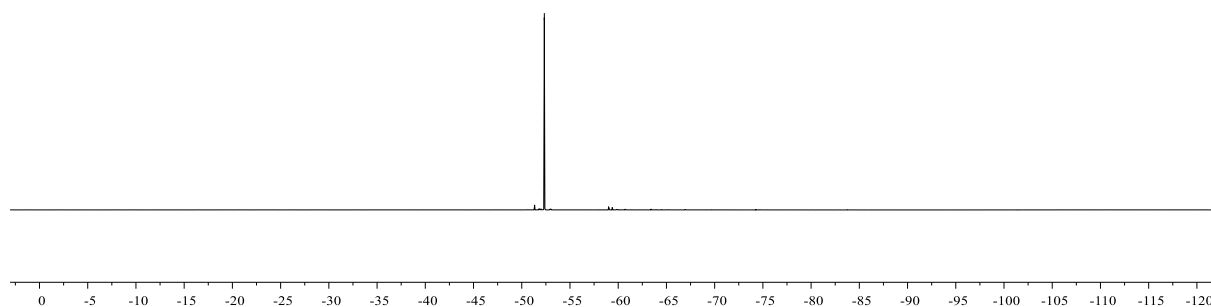

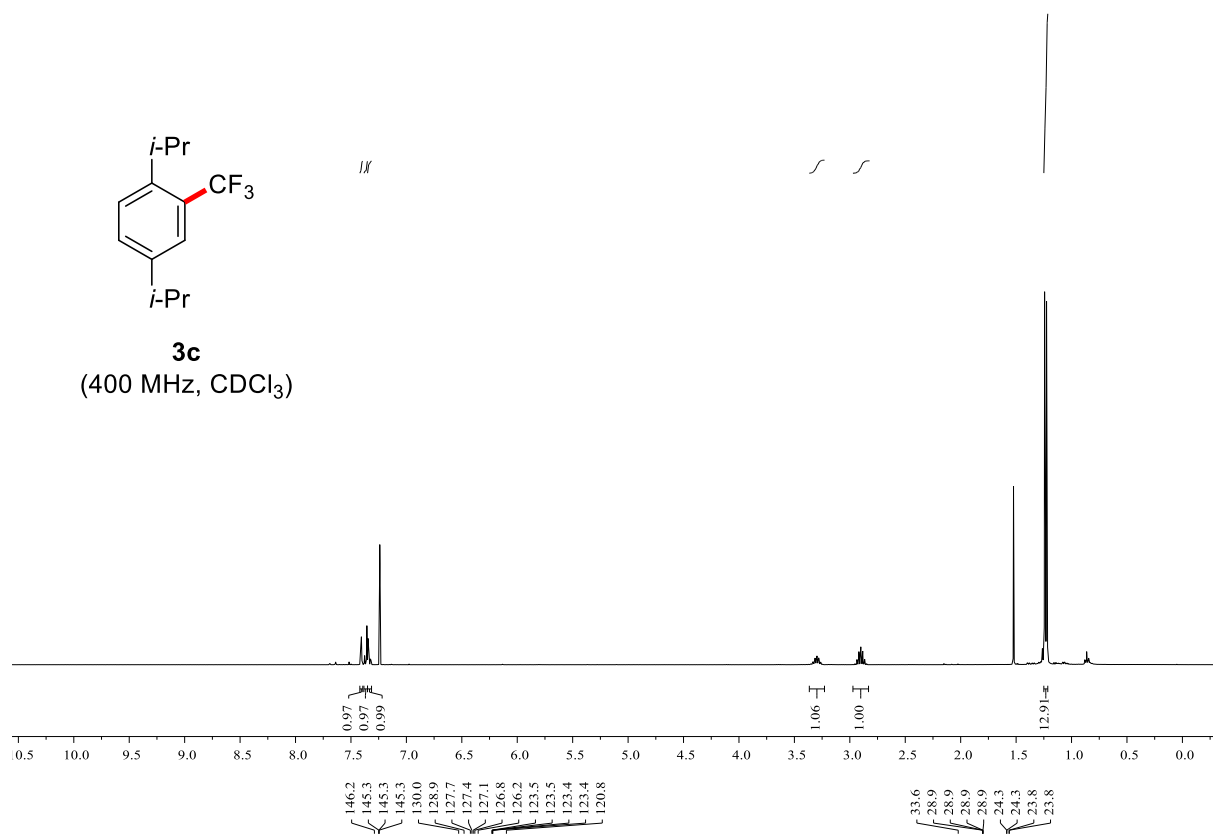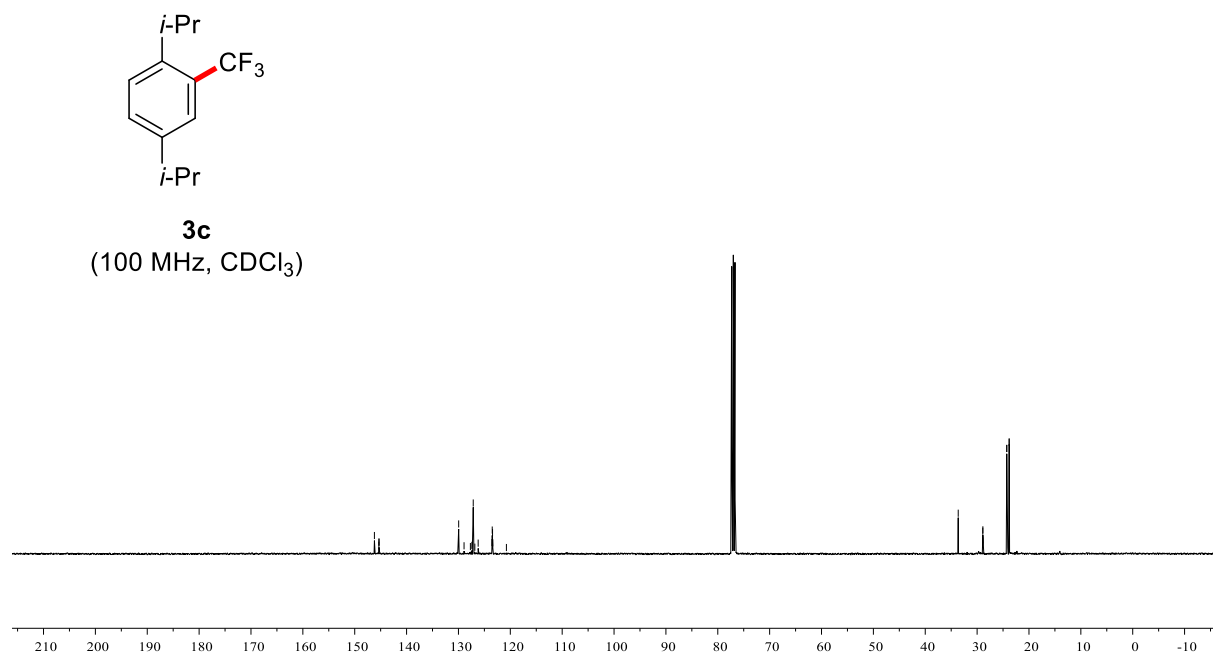

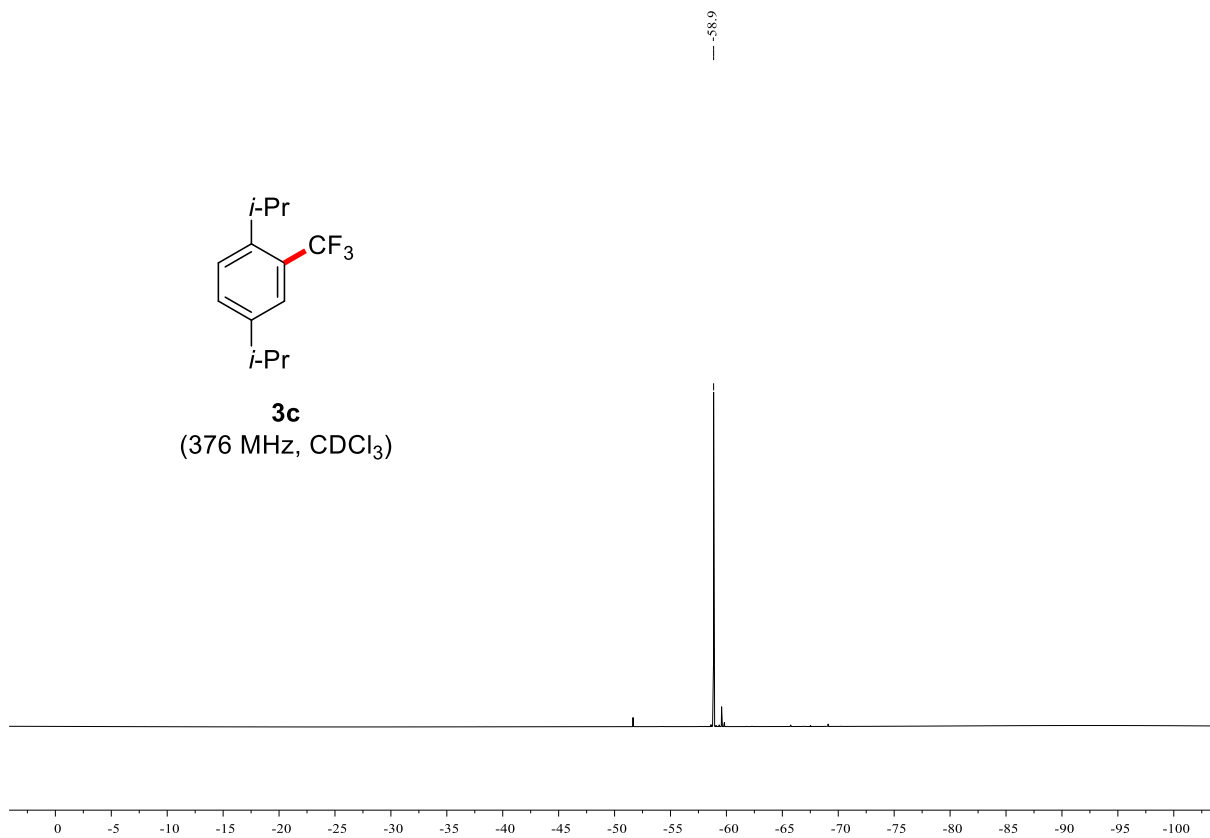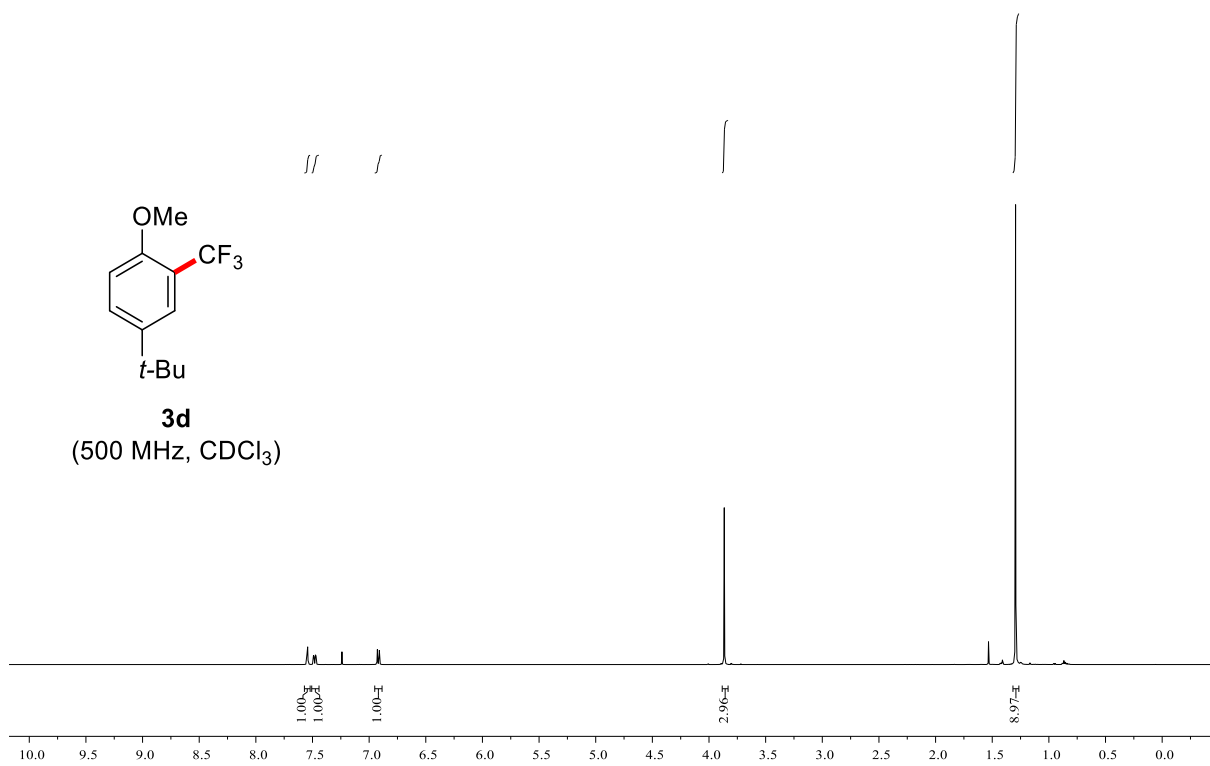

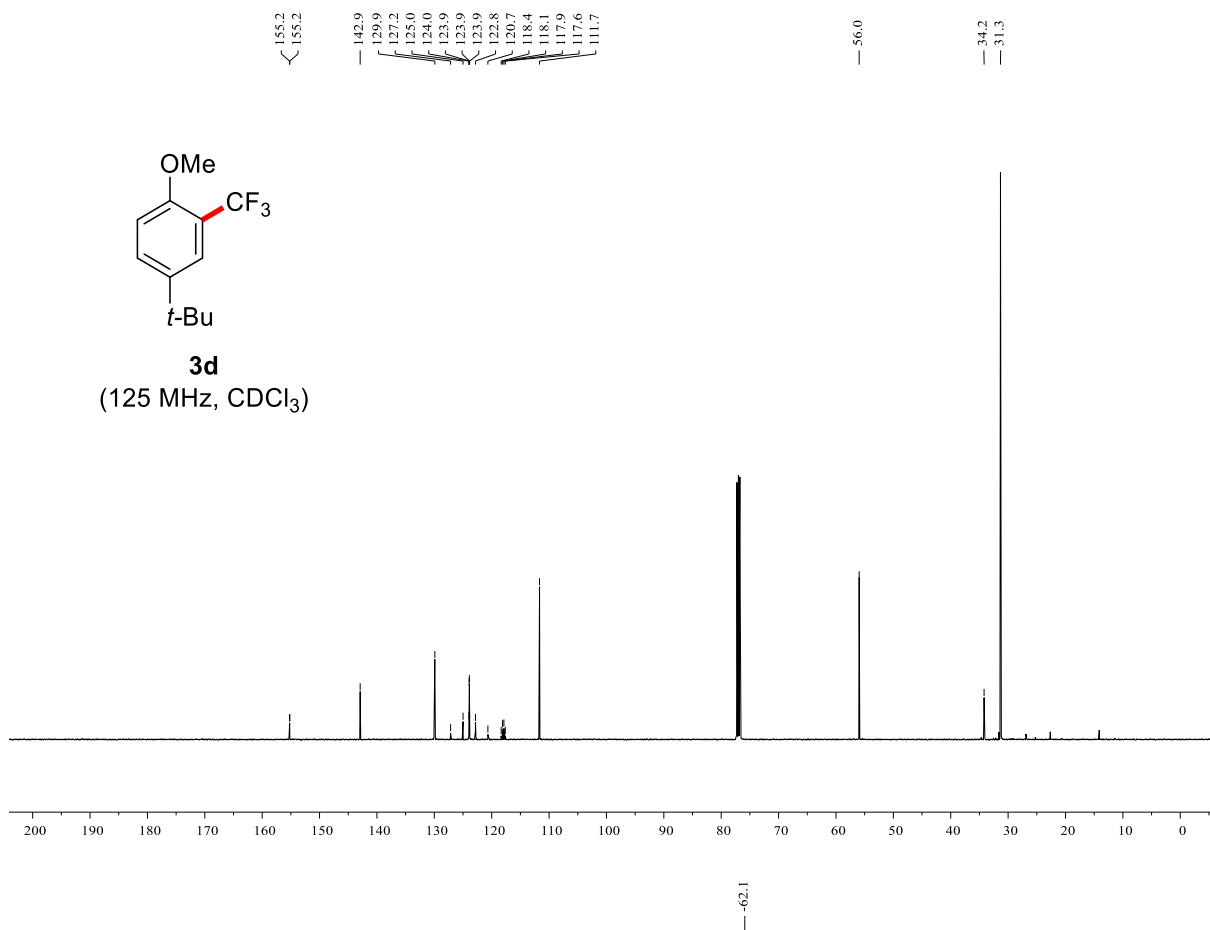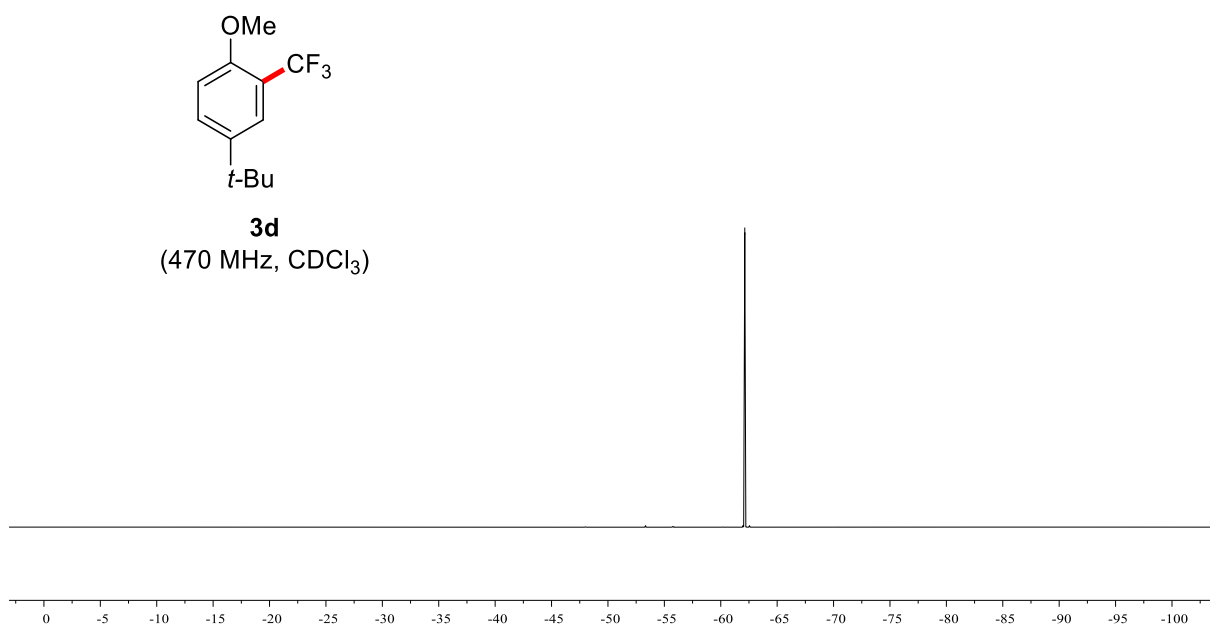



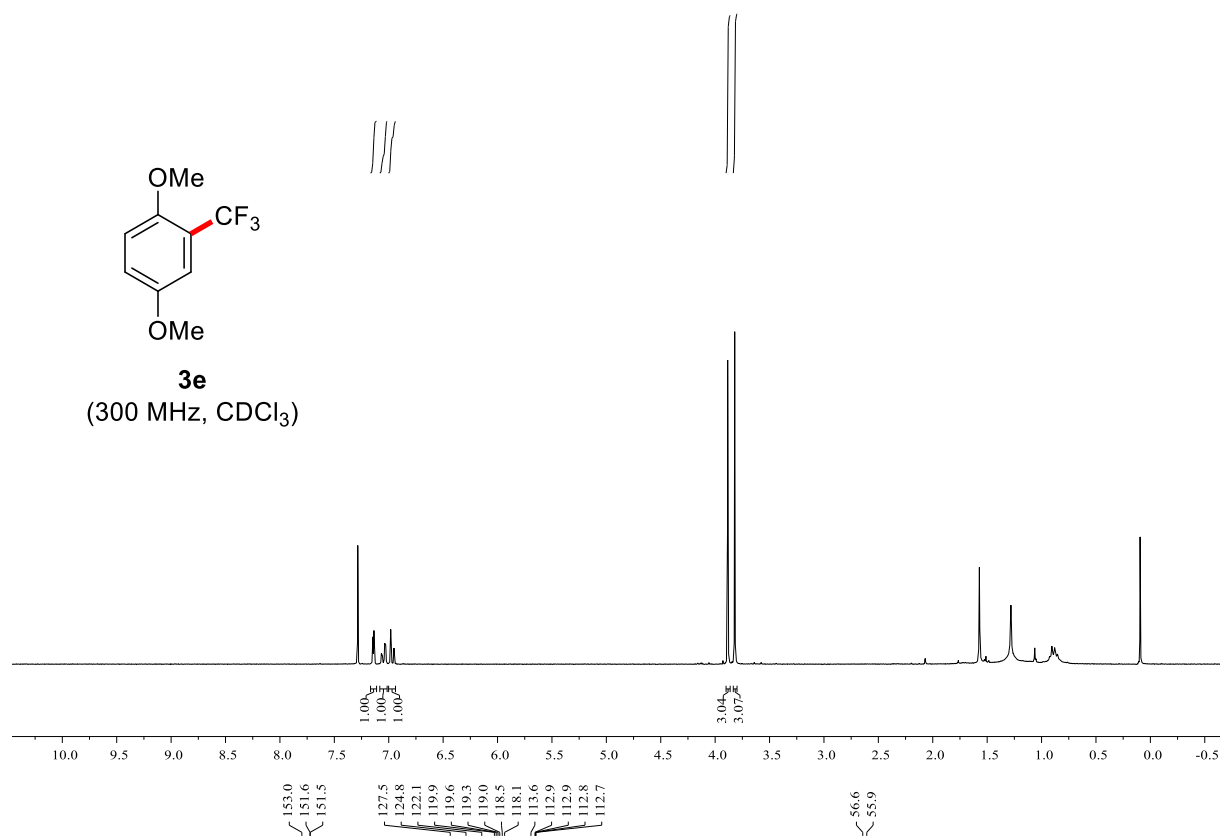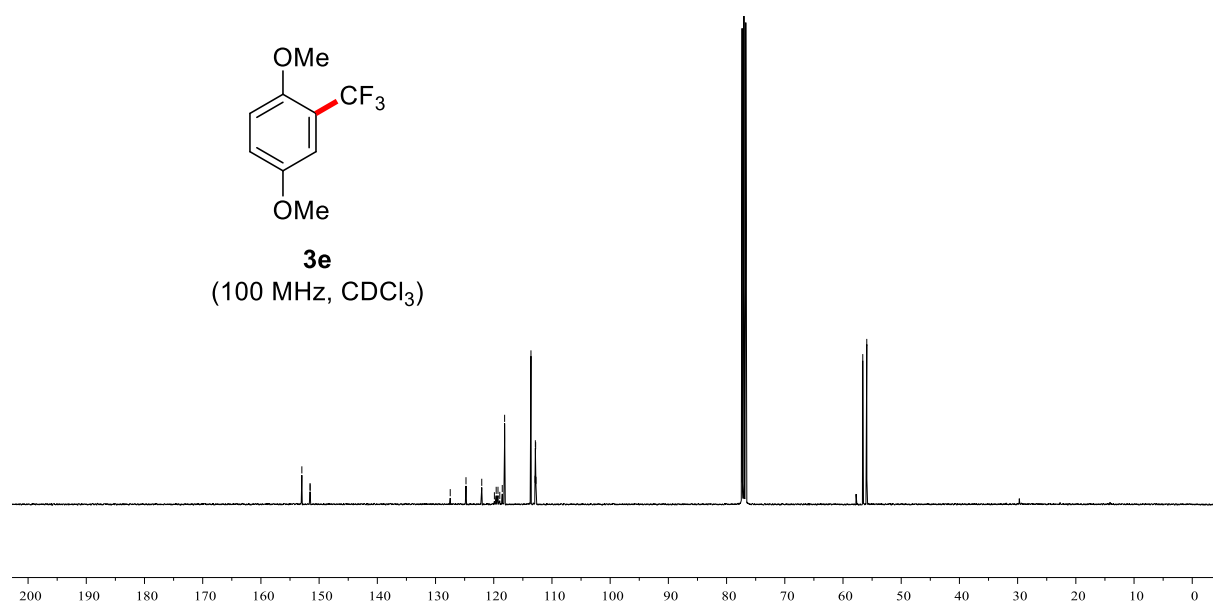

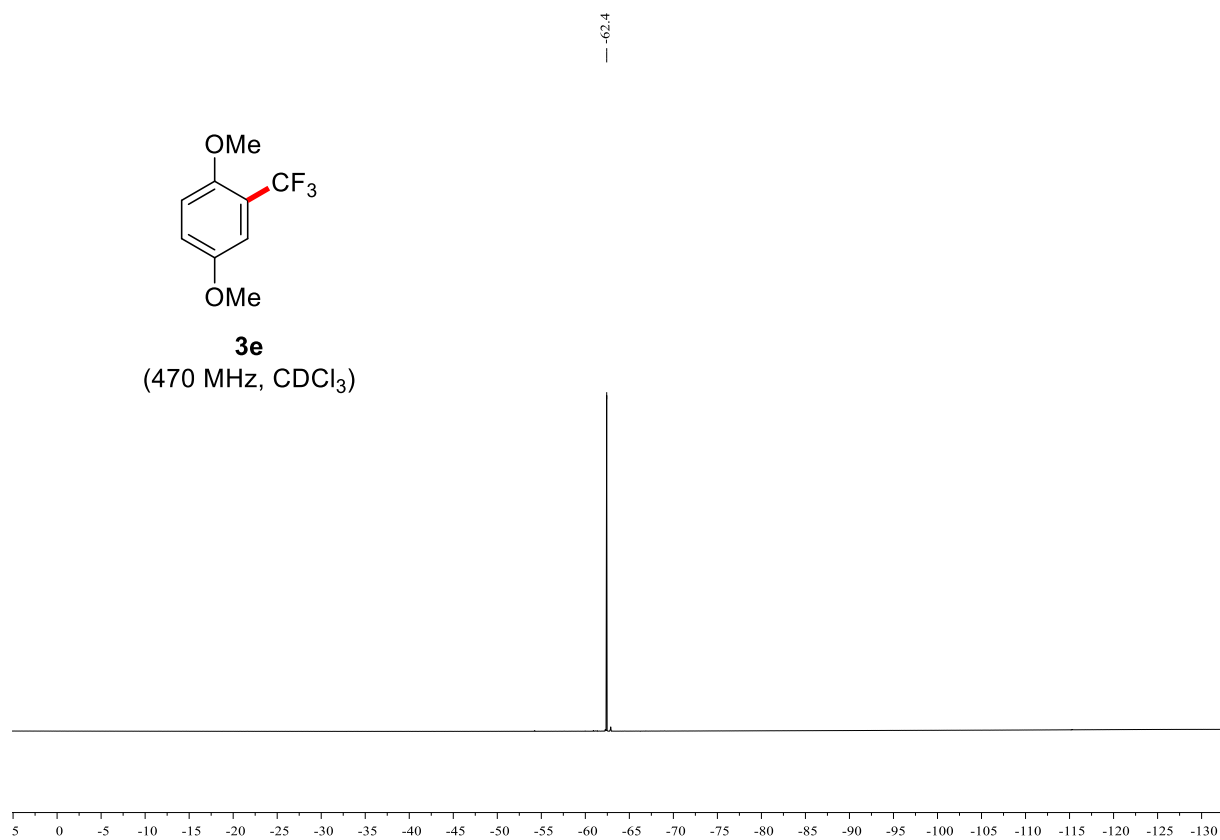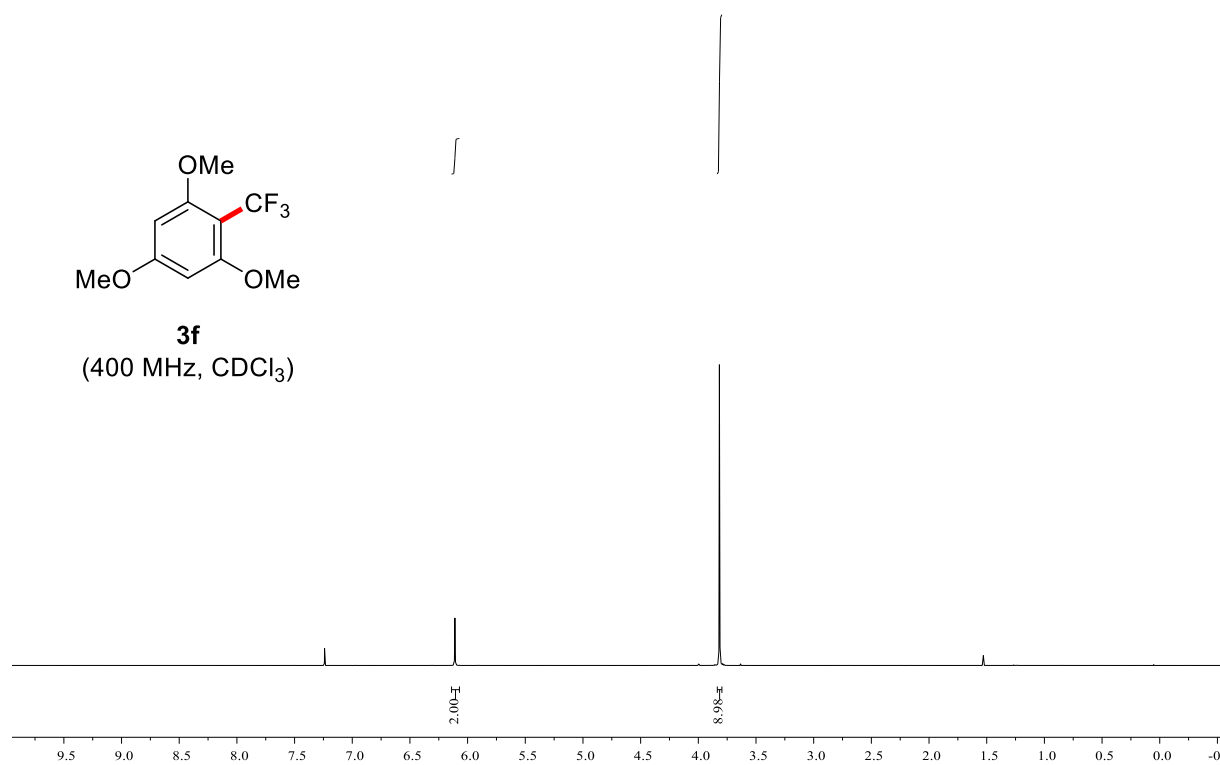

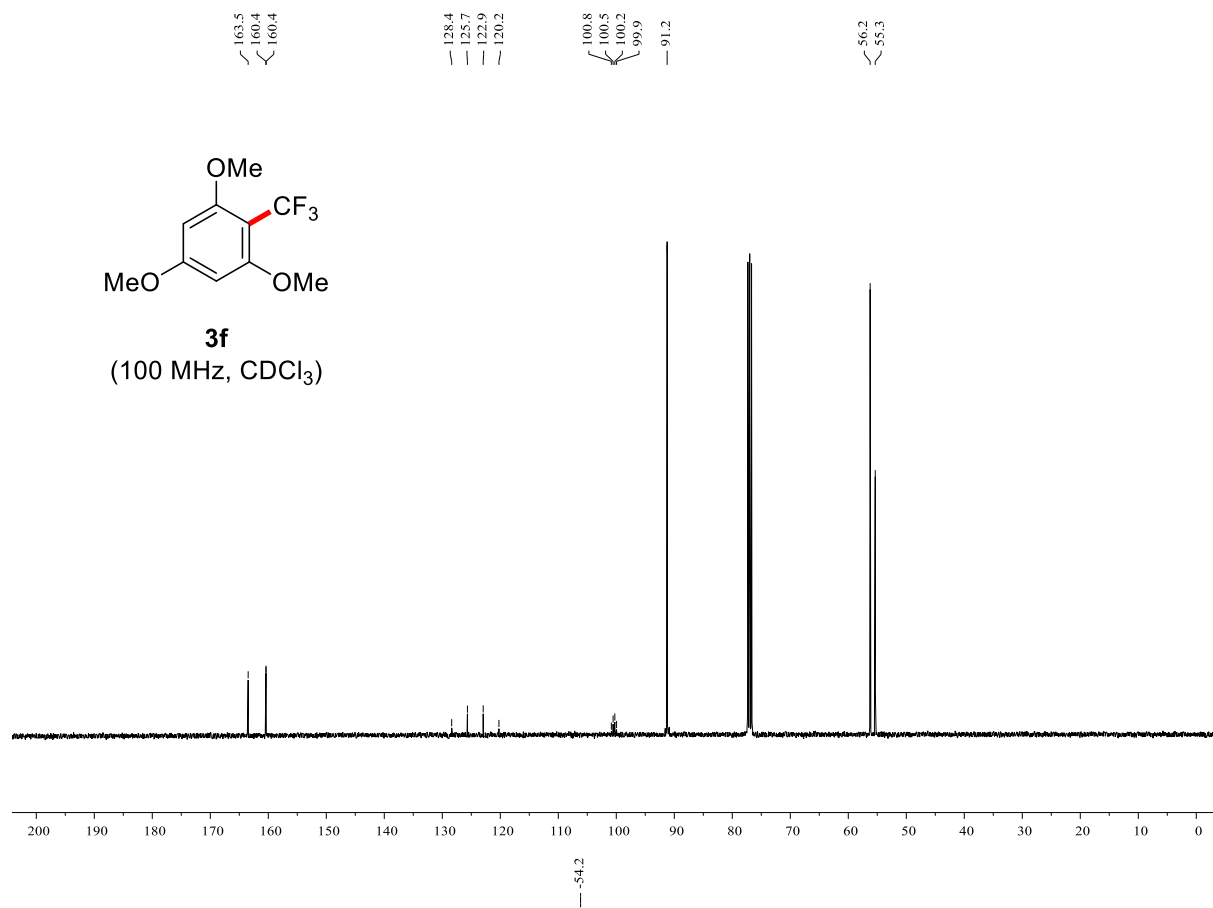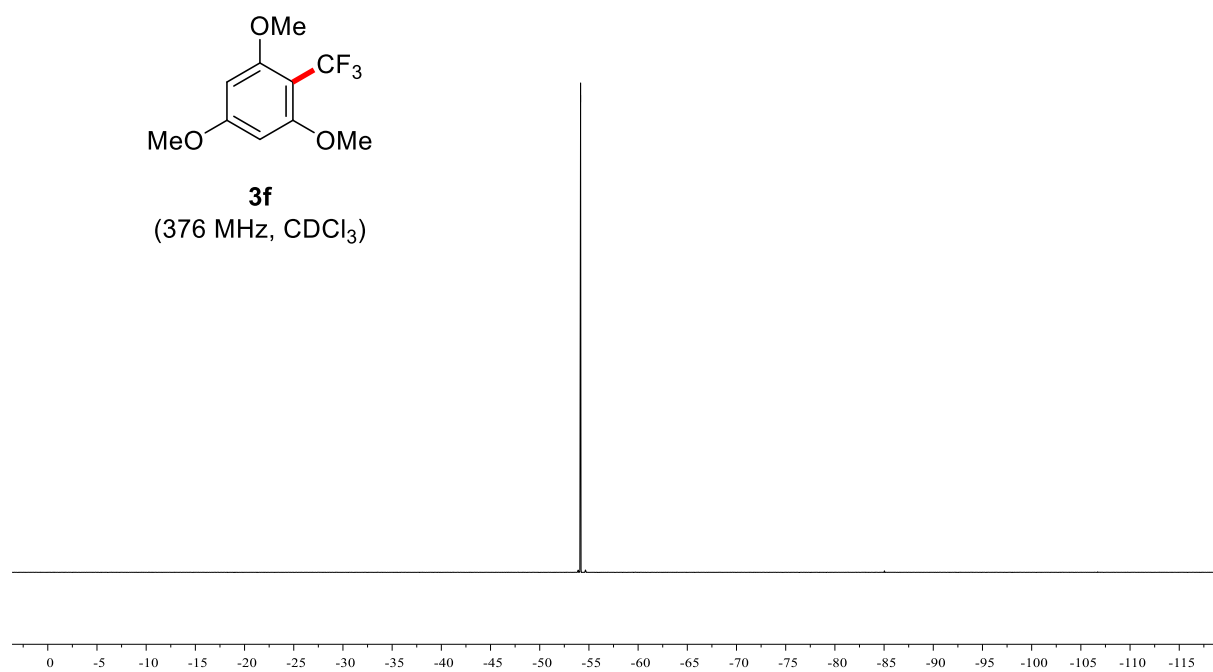

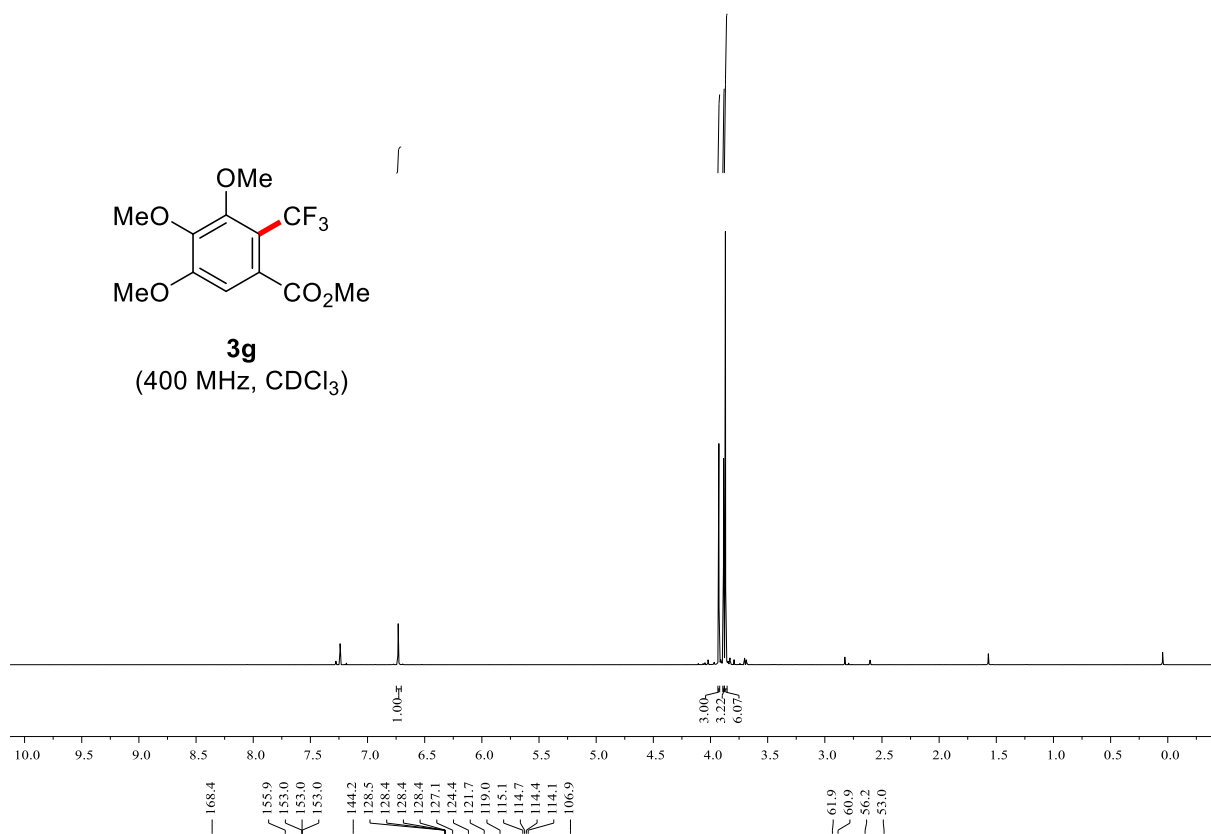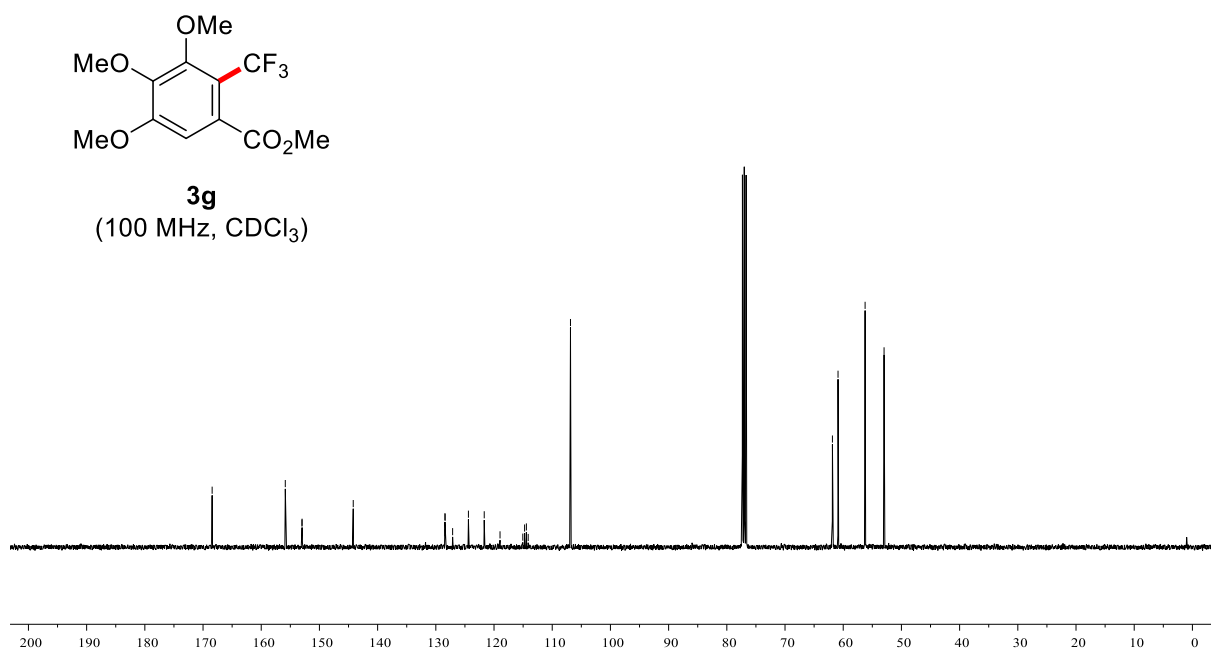

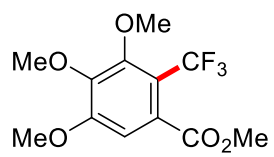

**3g**  
(376 MHz, CDCl<sub>3</sub>)

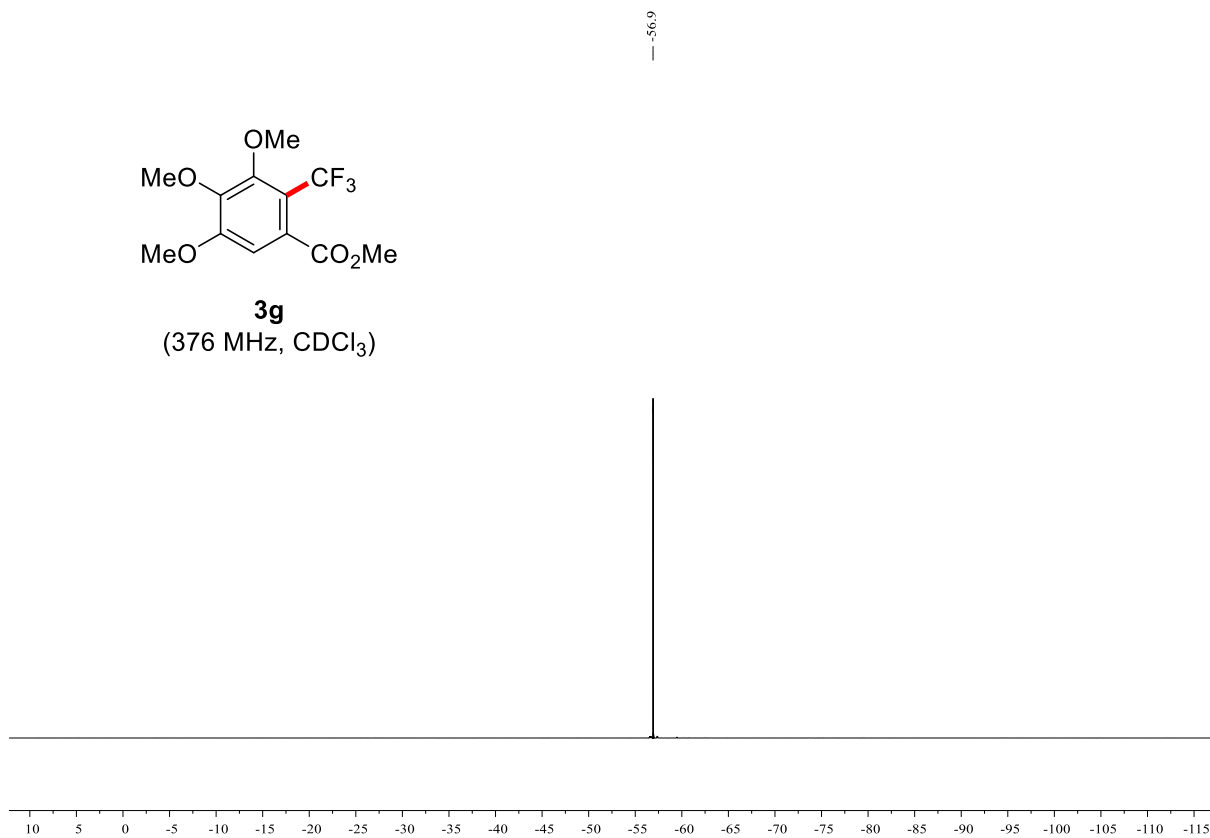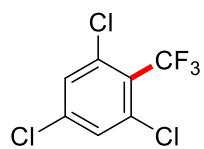

**3h**  
(400 MHz, CDCl<sub>3</sub>)

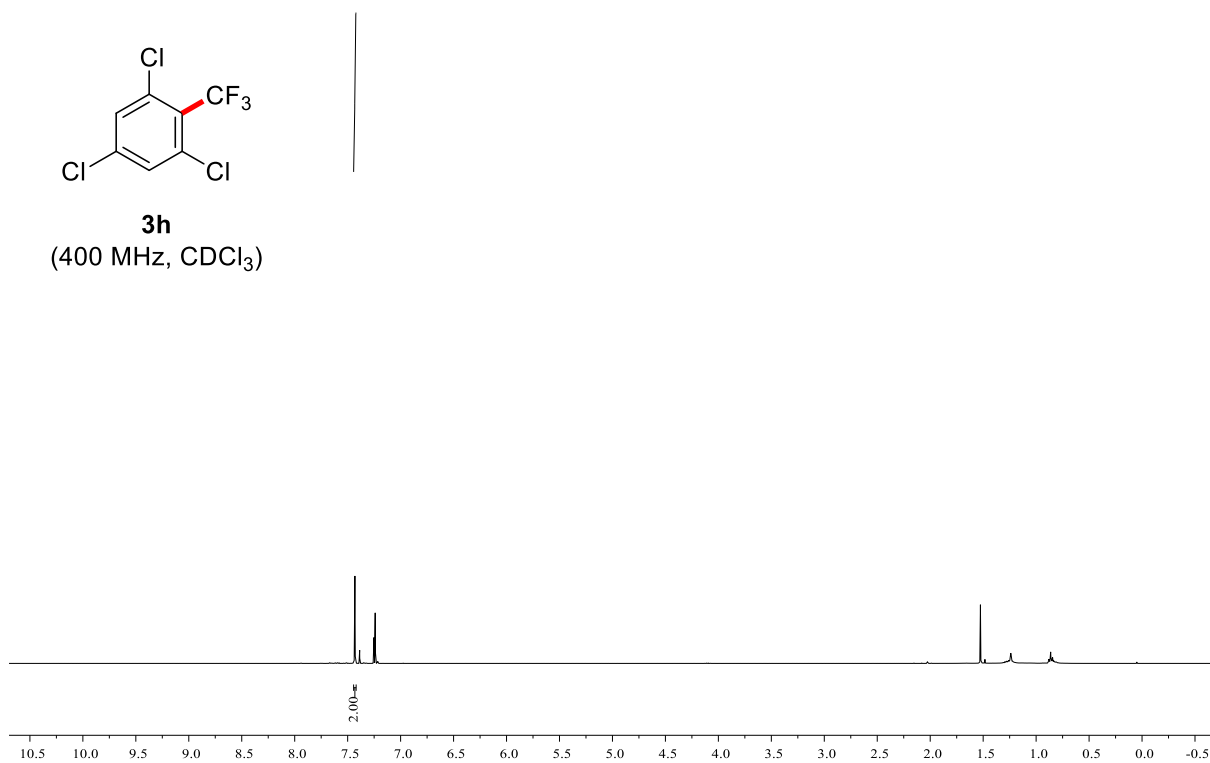

138.0  
135.3  
135.3  
130.6  
126.4  
125.3  
125.0  
124.7  
124.4  
123.6  
120.9  
118.1

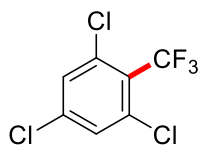

**3h**  
(100 MHz, CDCl<sub>3</sub>)

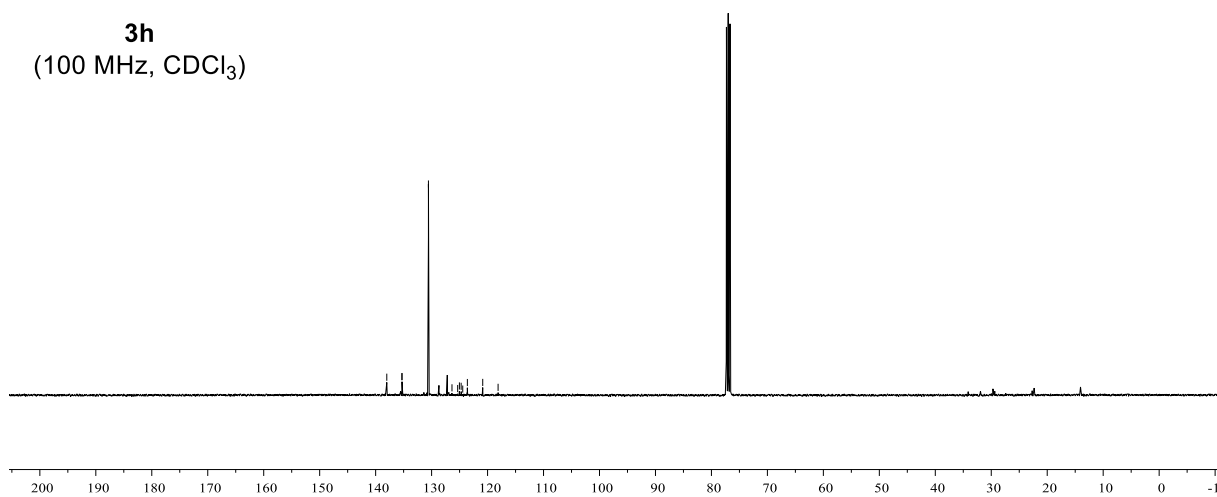

-55.7

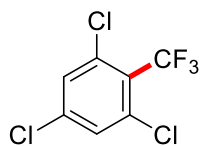

**3h**  
(376 MHz, CDCl<sub>3</sub>)

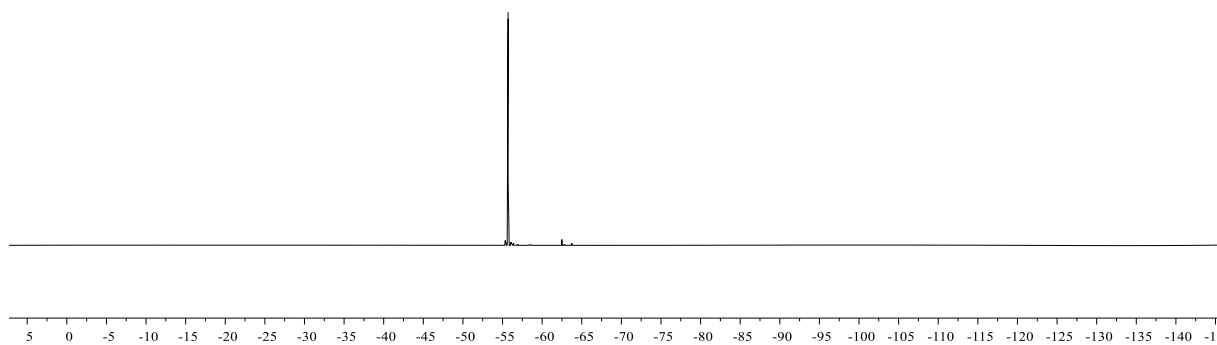

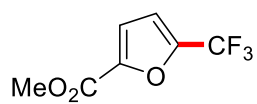

**5a**  
(400 MHz, CDCl<sub>3</sub>)

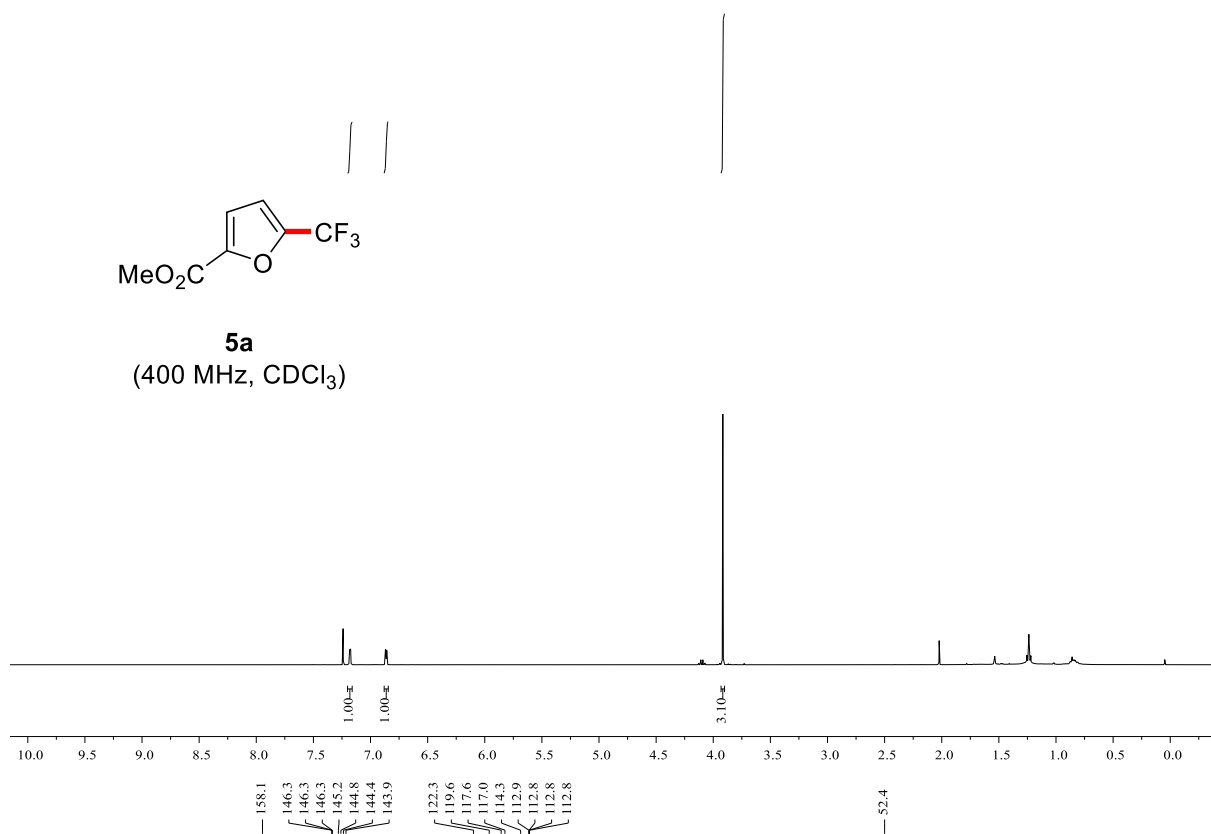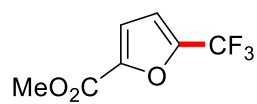

**5a**  
(100 MHz, CDCl<sub>3</sub>)

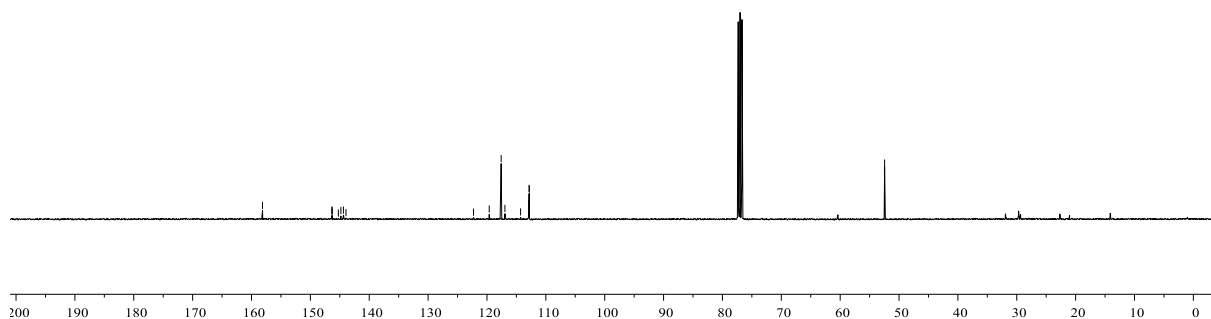

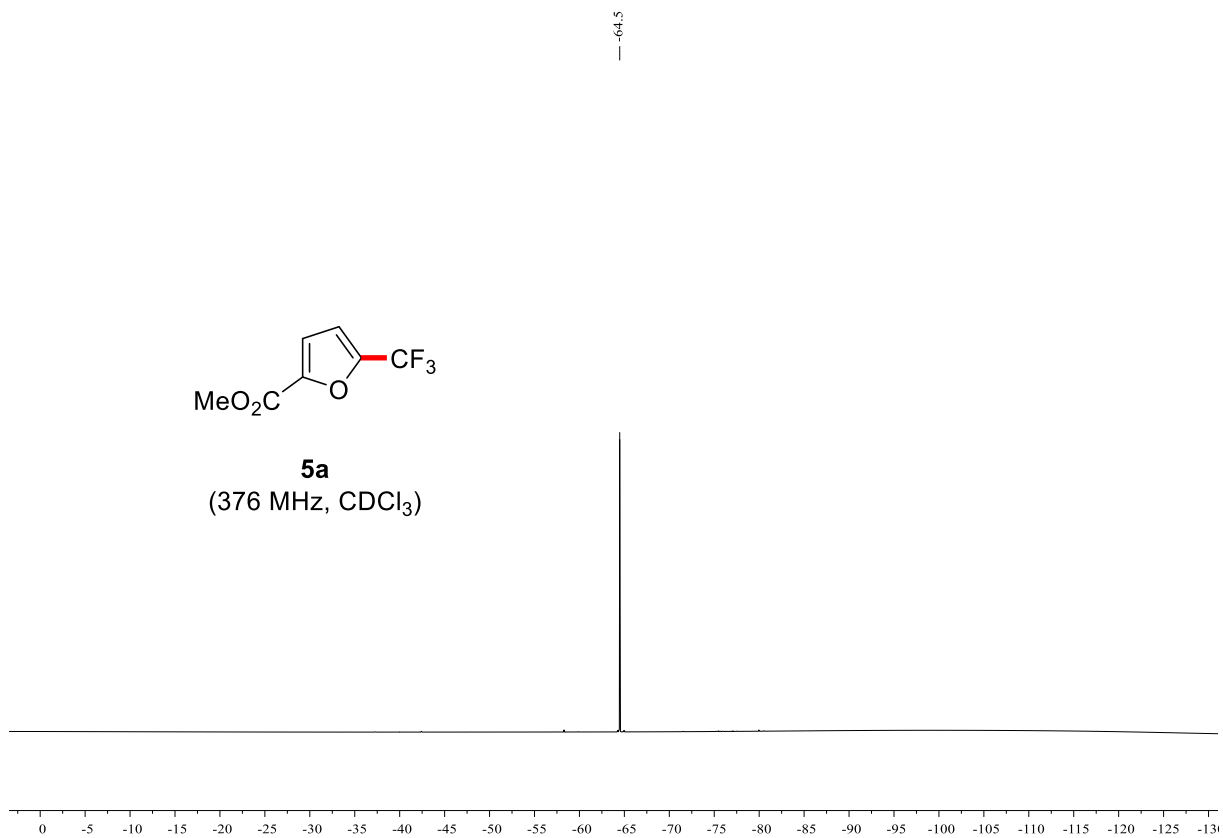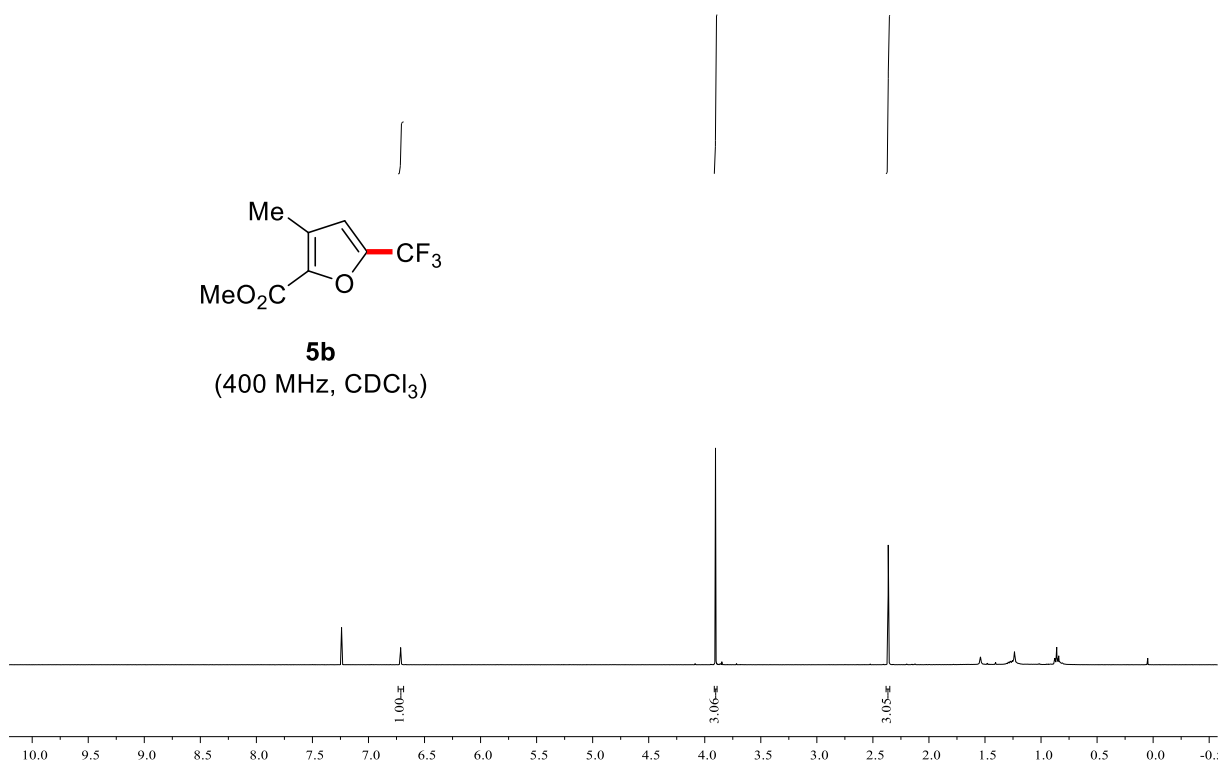



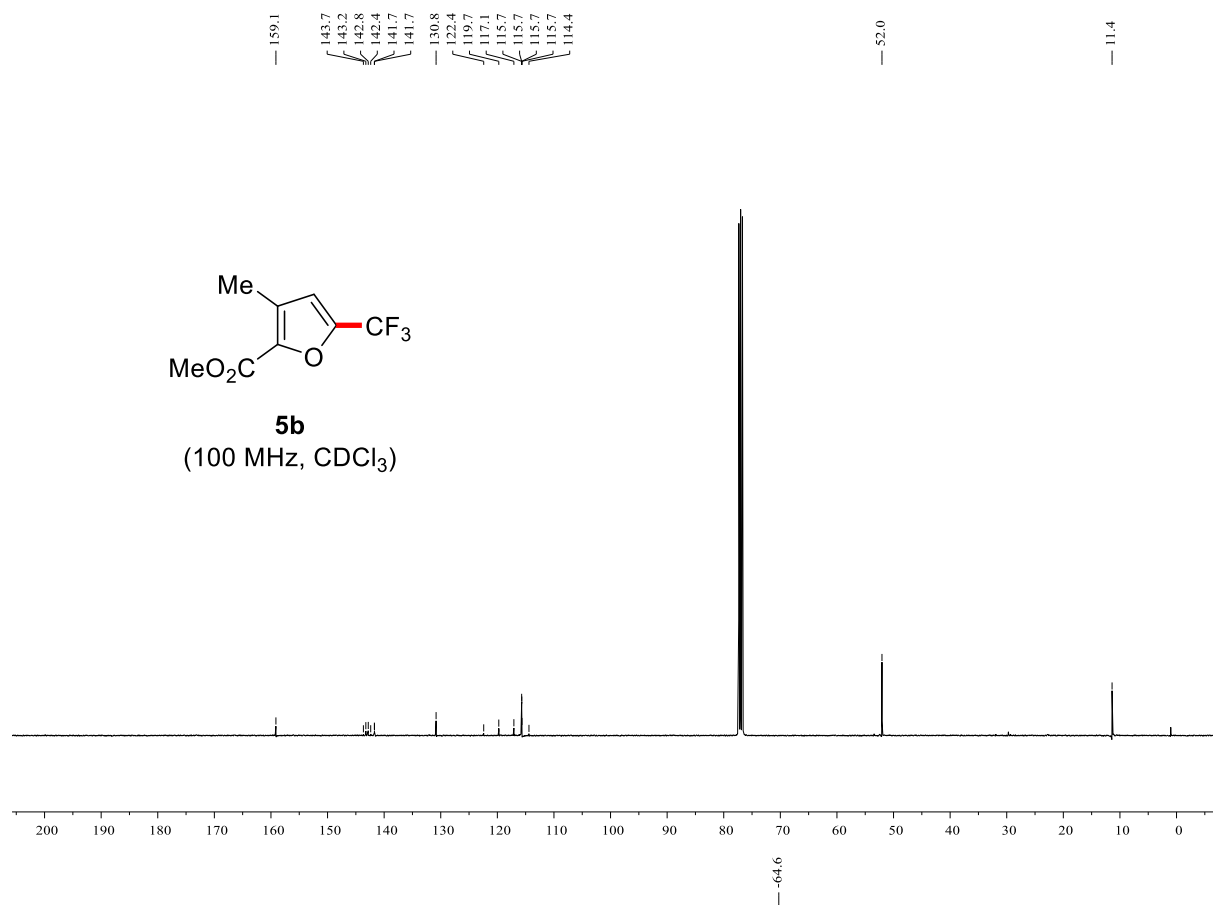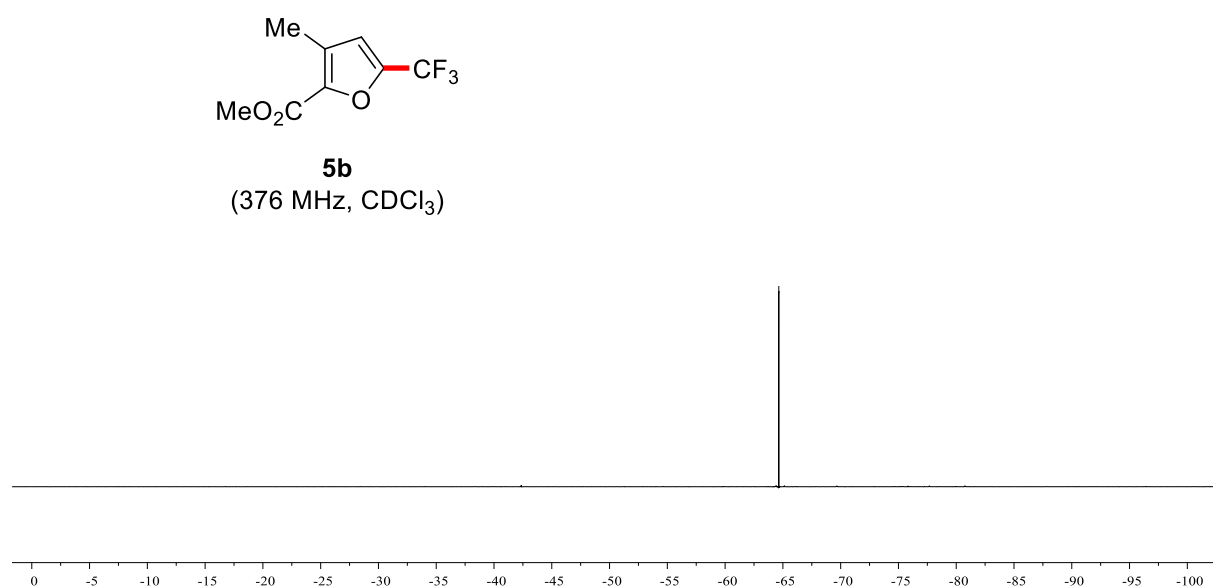

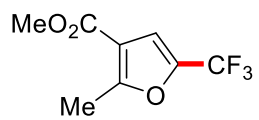

**5c**  
(400 MHz, CDCl<sub>3</sub>)

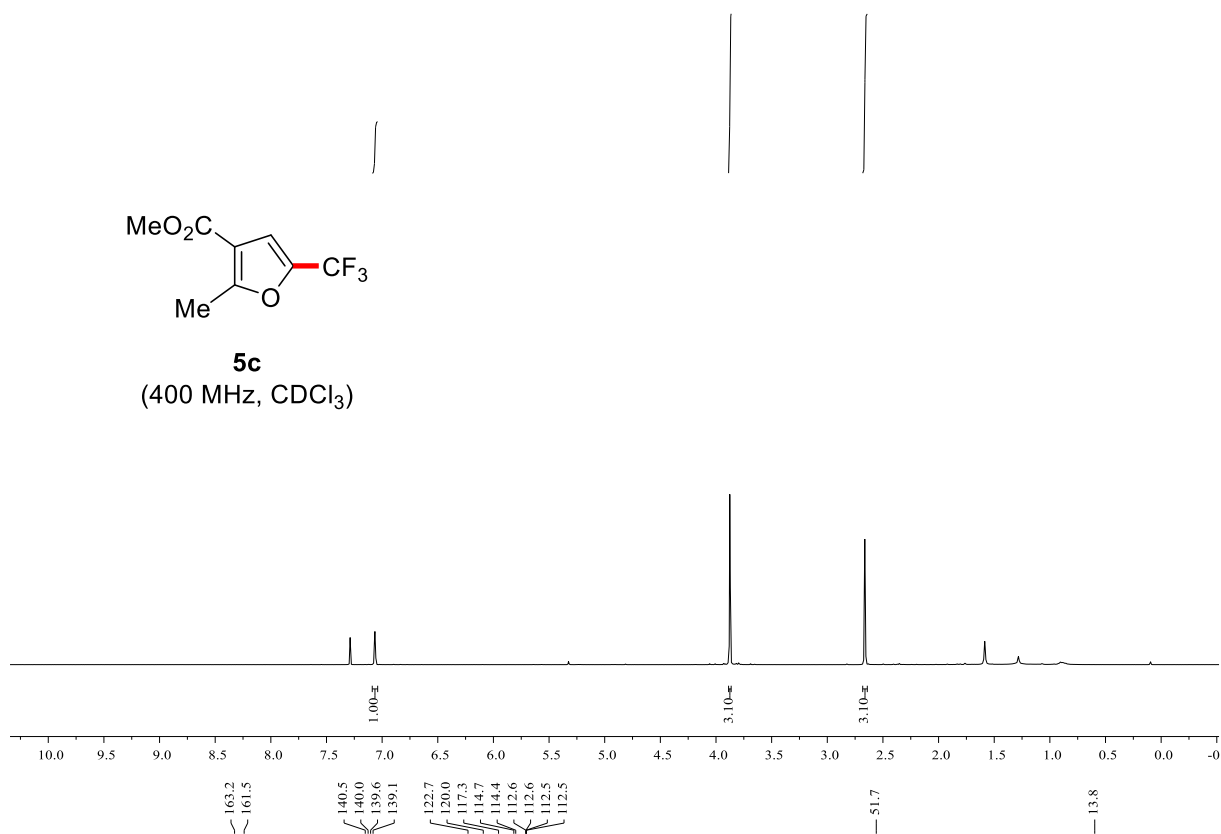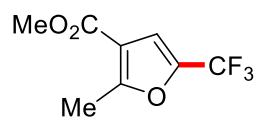

**5c**  
(100 MHz, CDCl<sub>3</sub>)

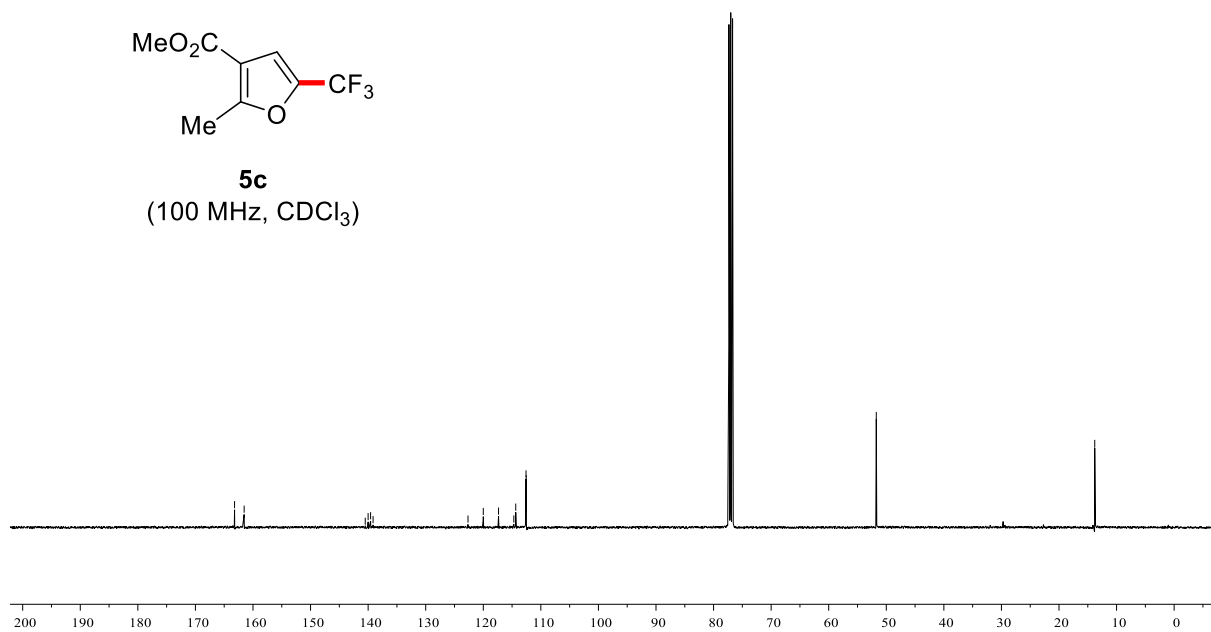

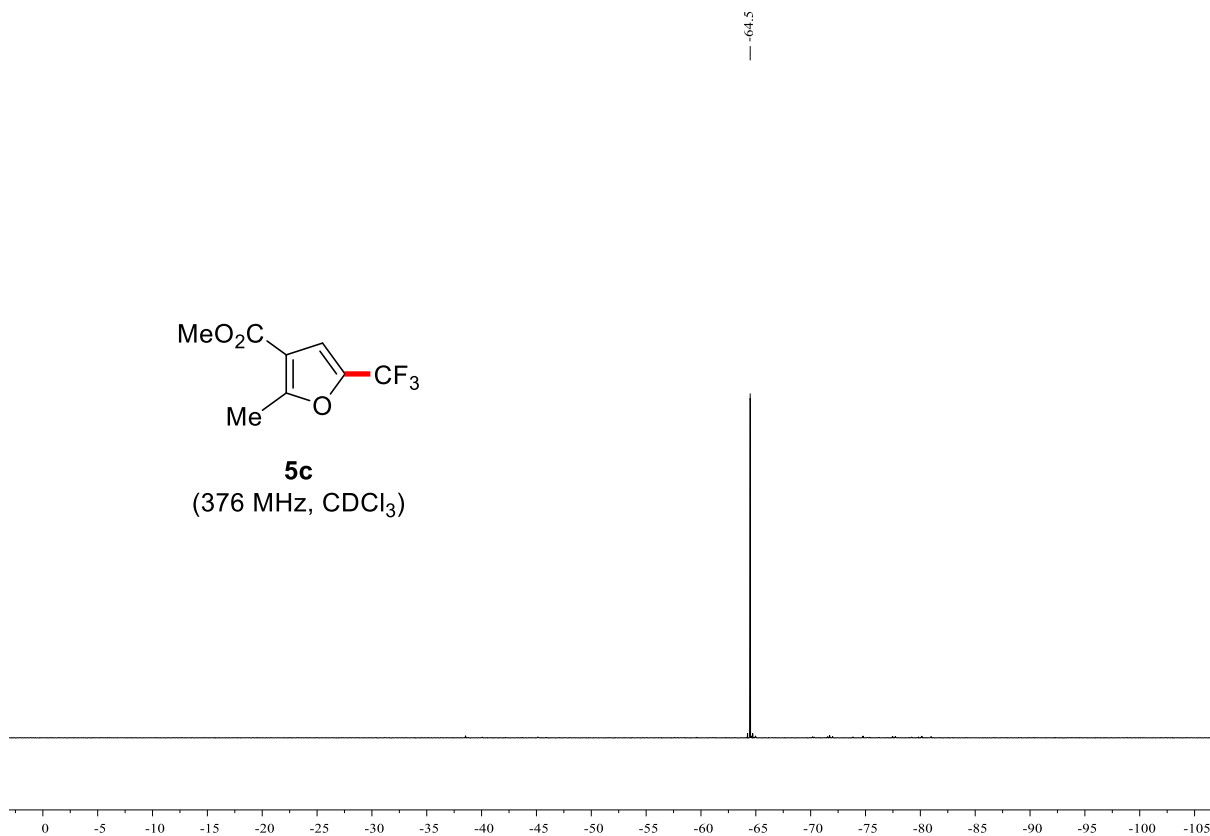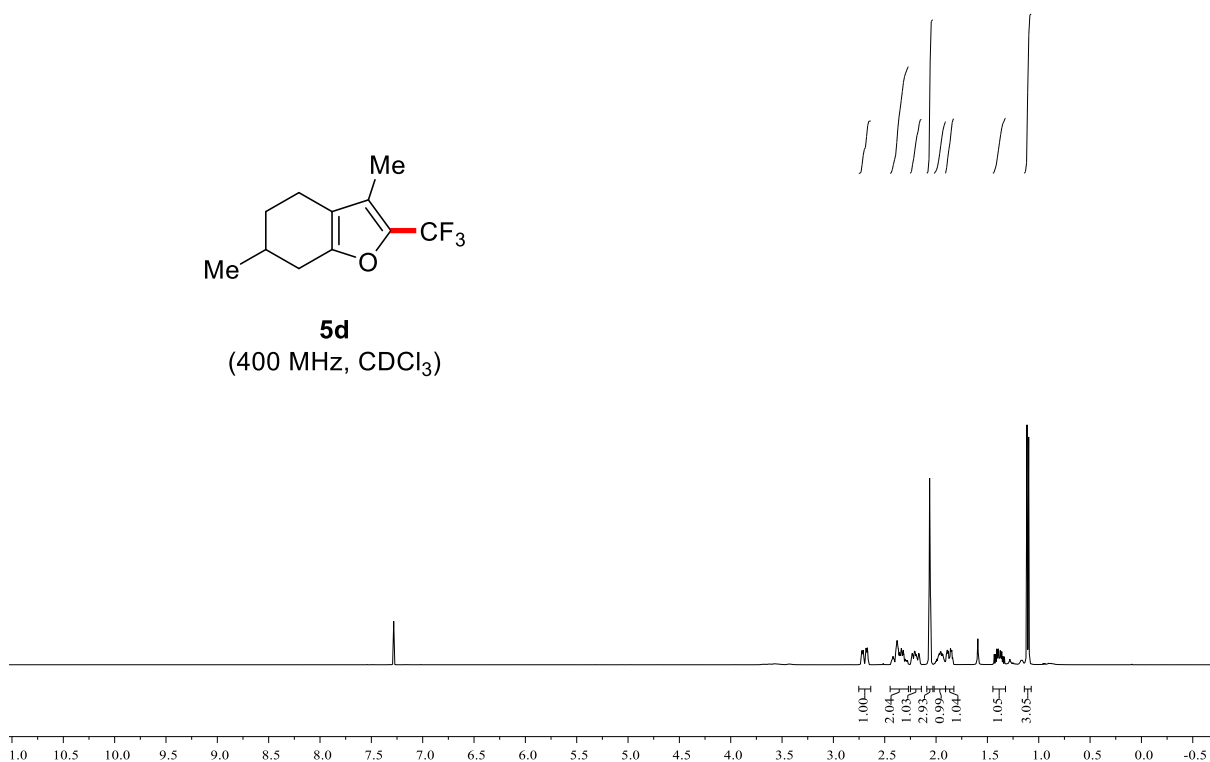

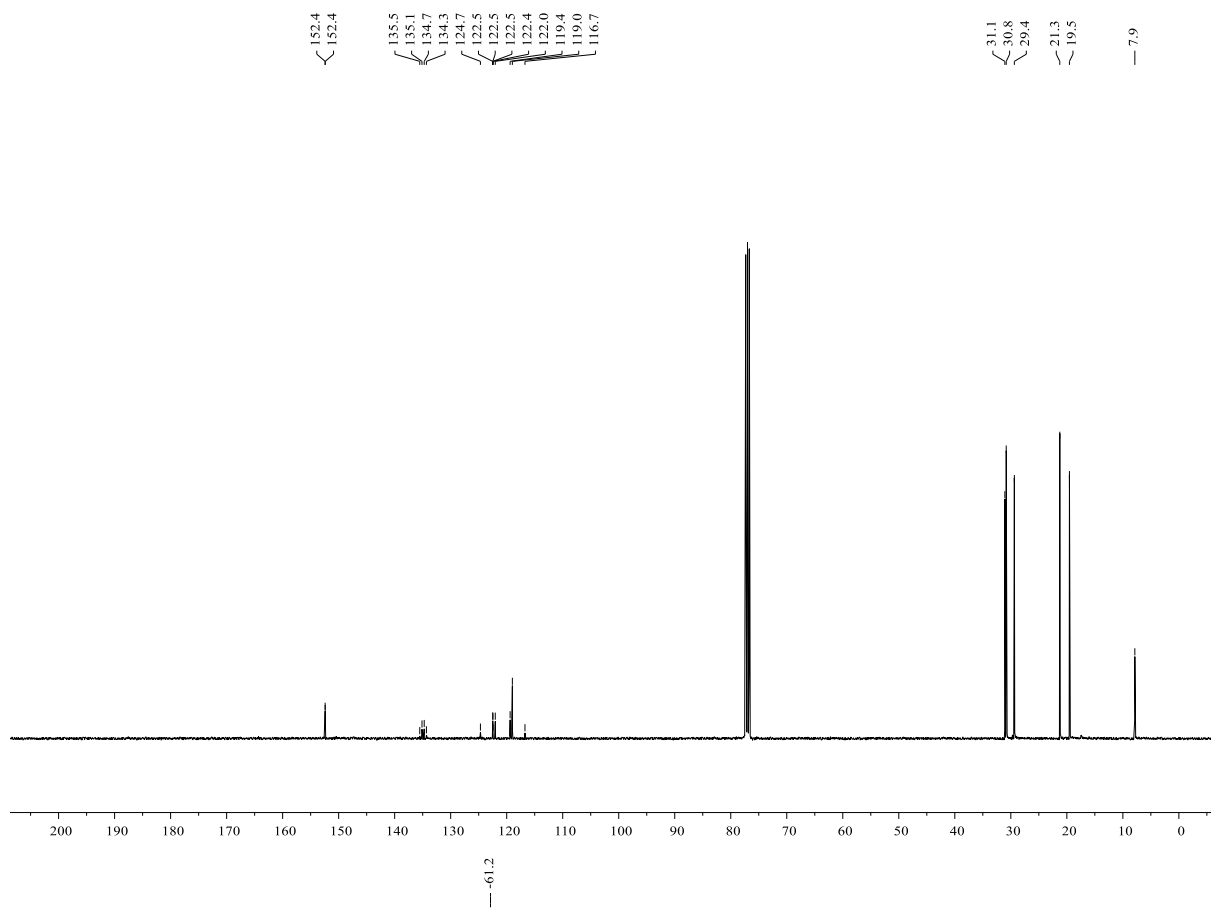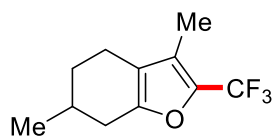

**5d**  
(376 MHz, CDCl<sub>3</sub>)

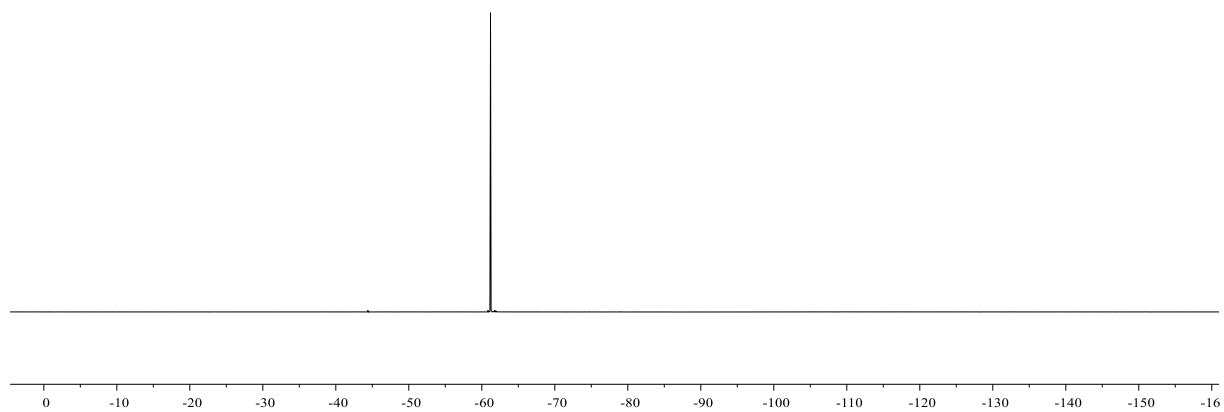

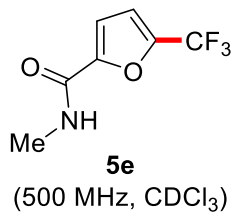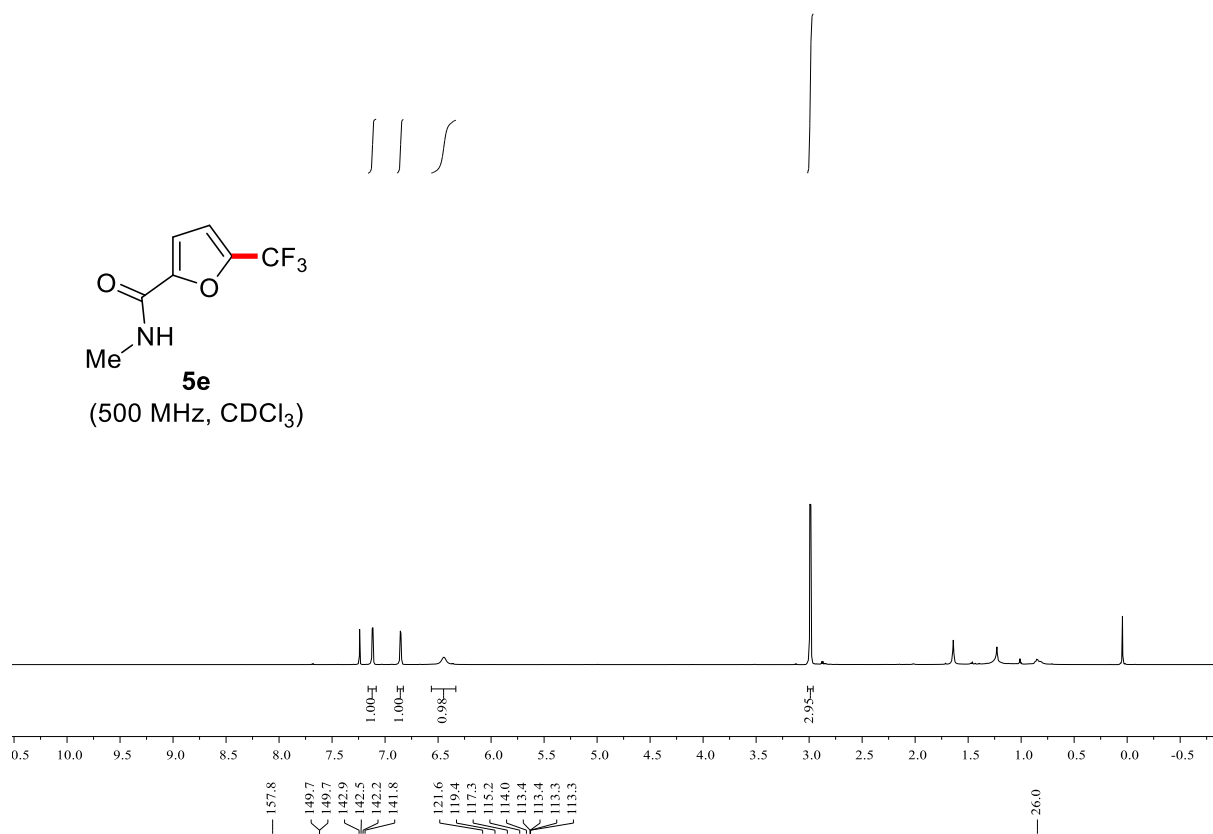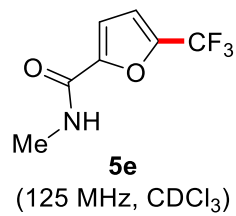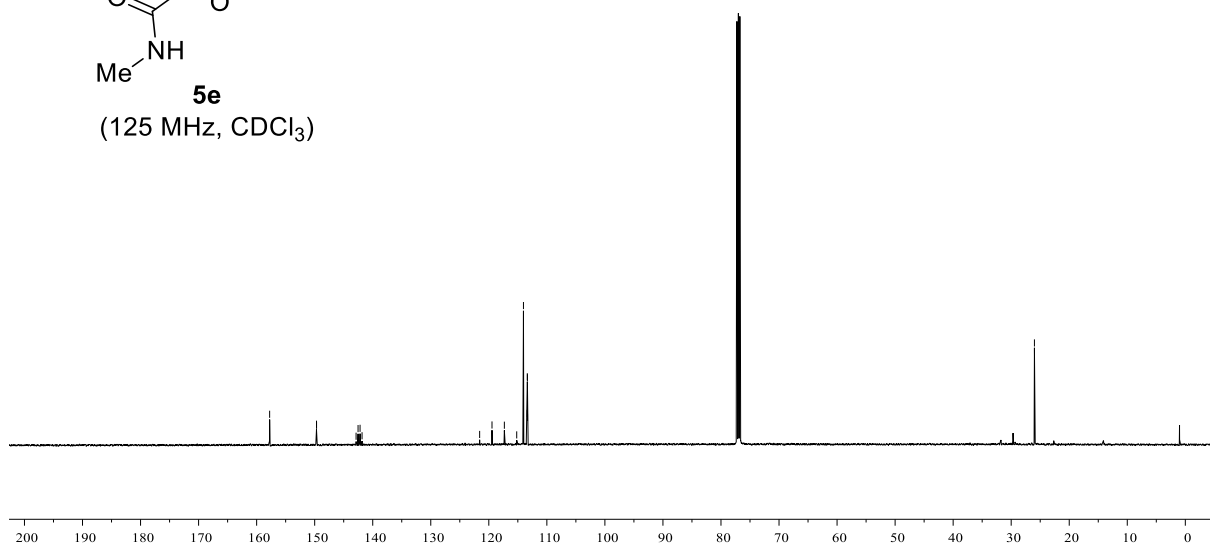

-64.3

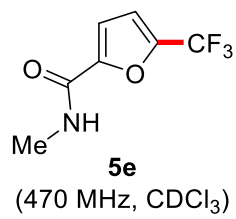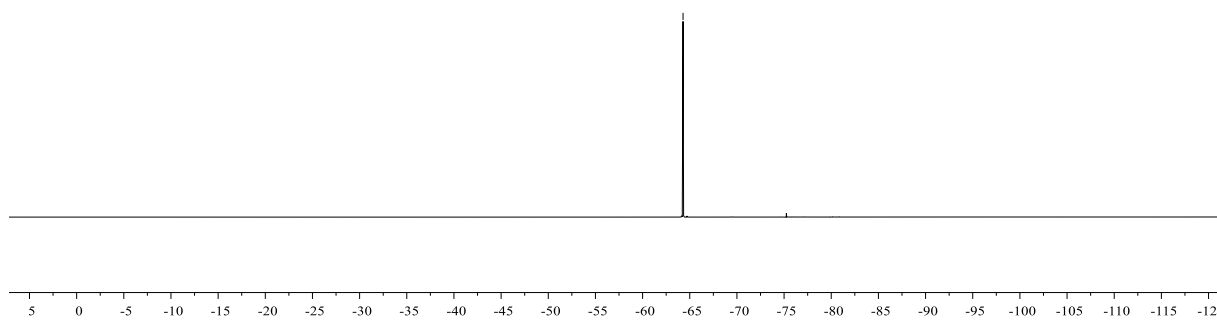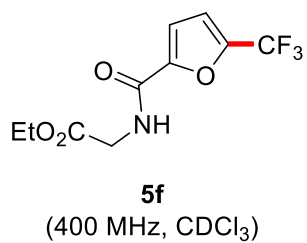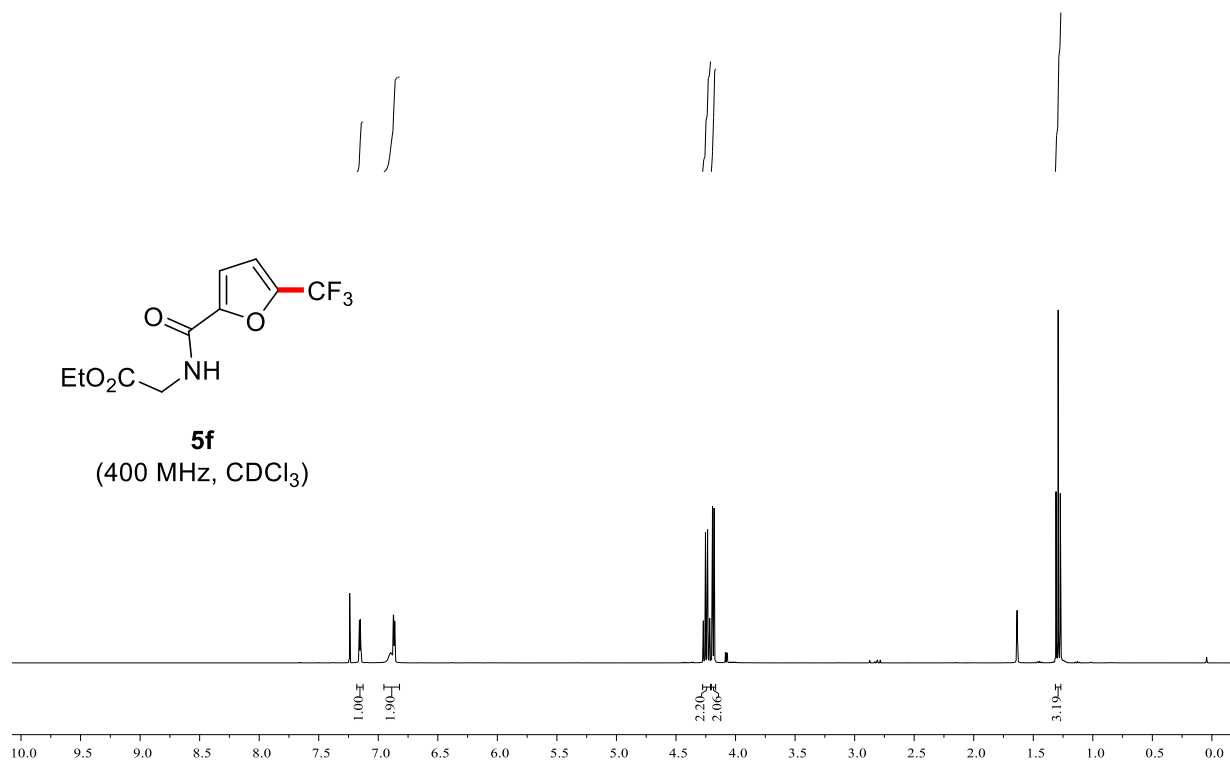

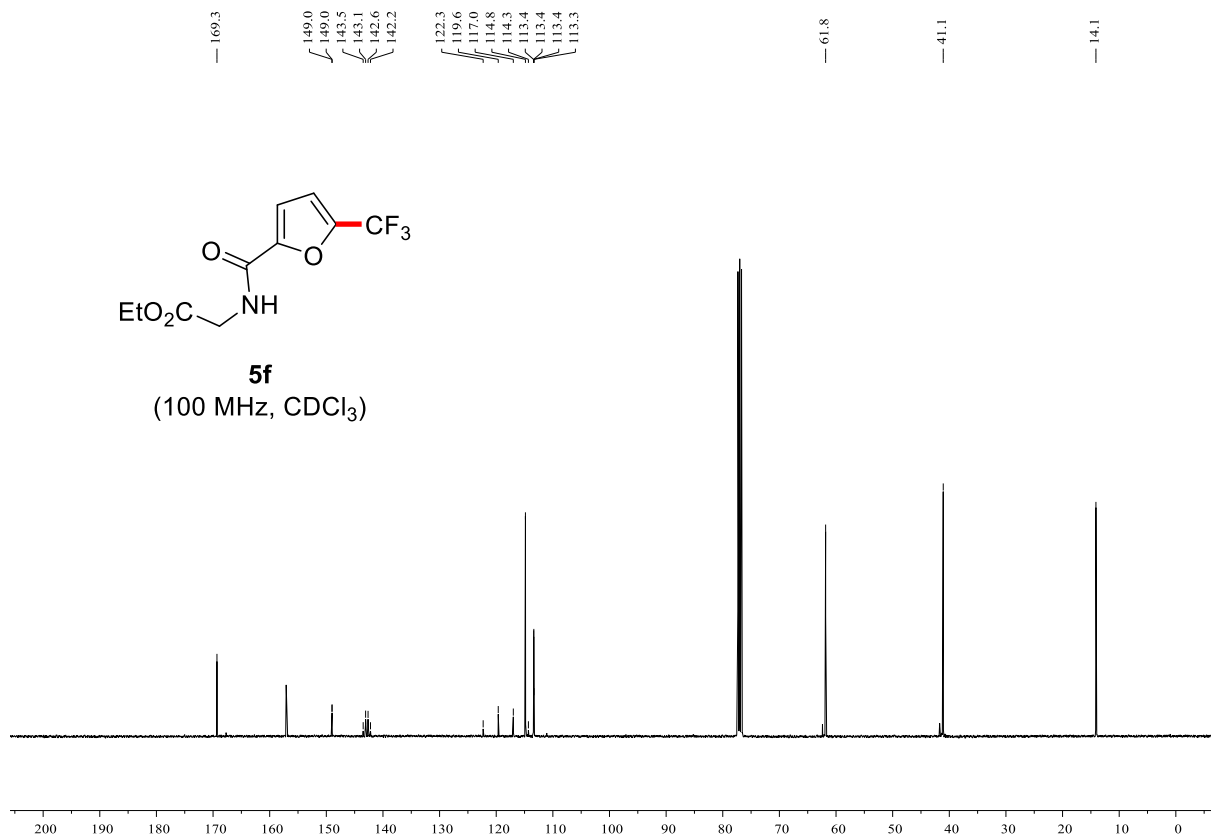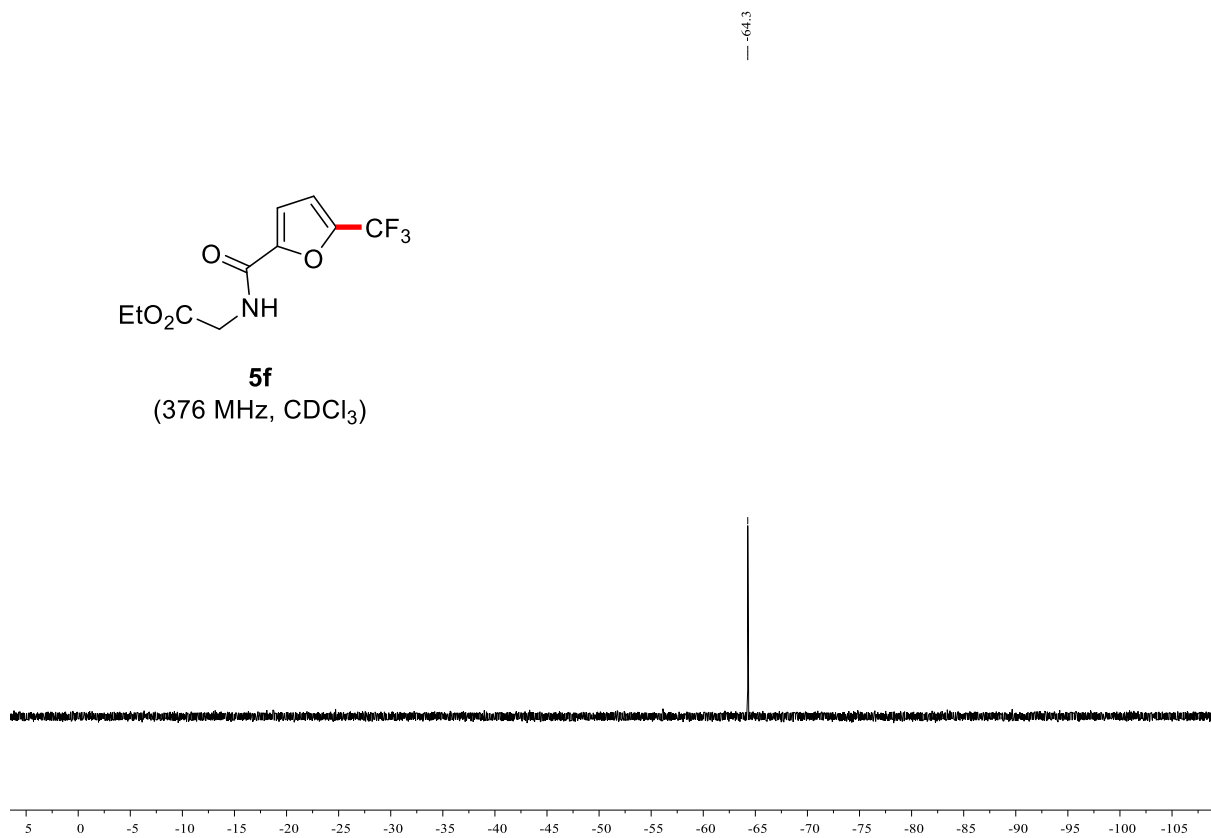

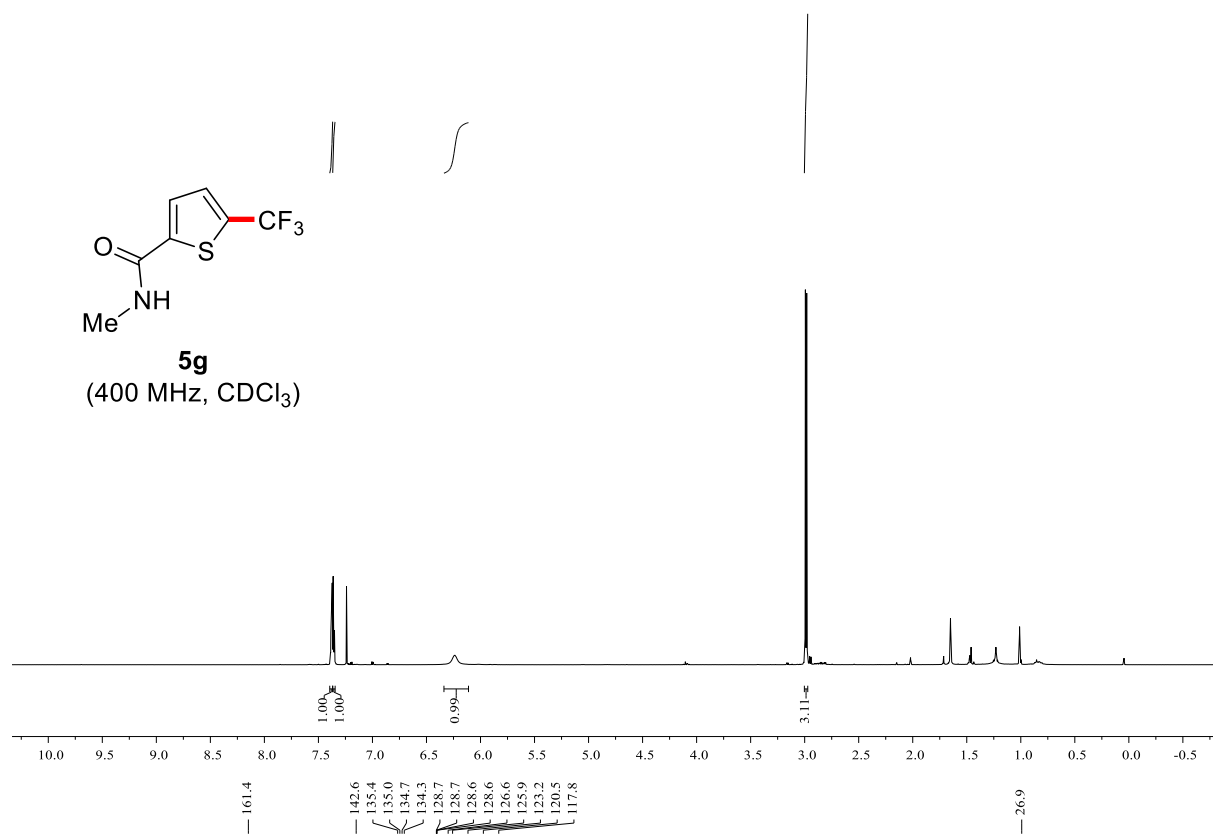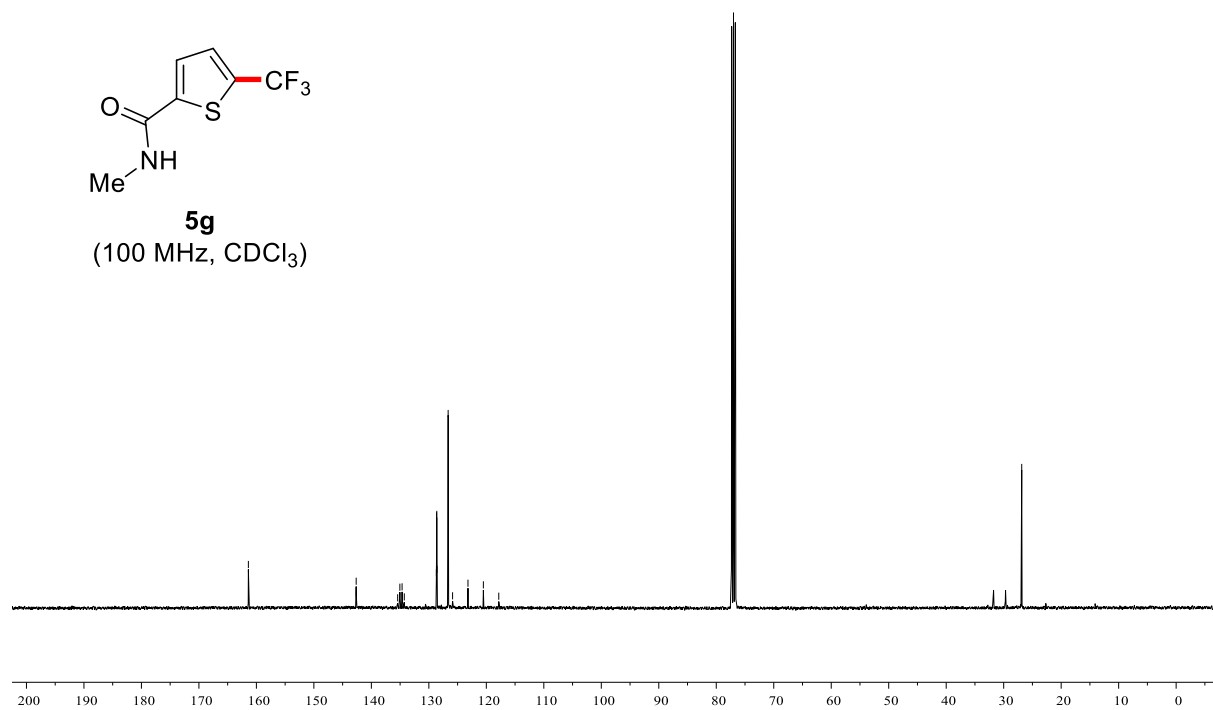



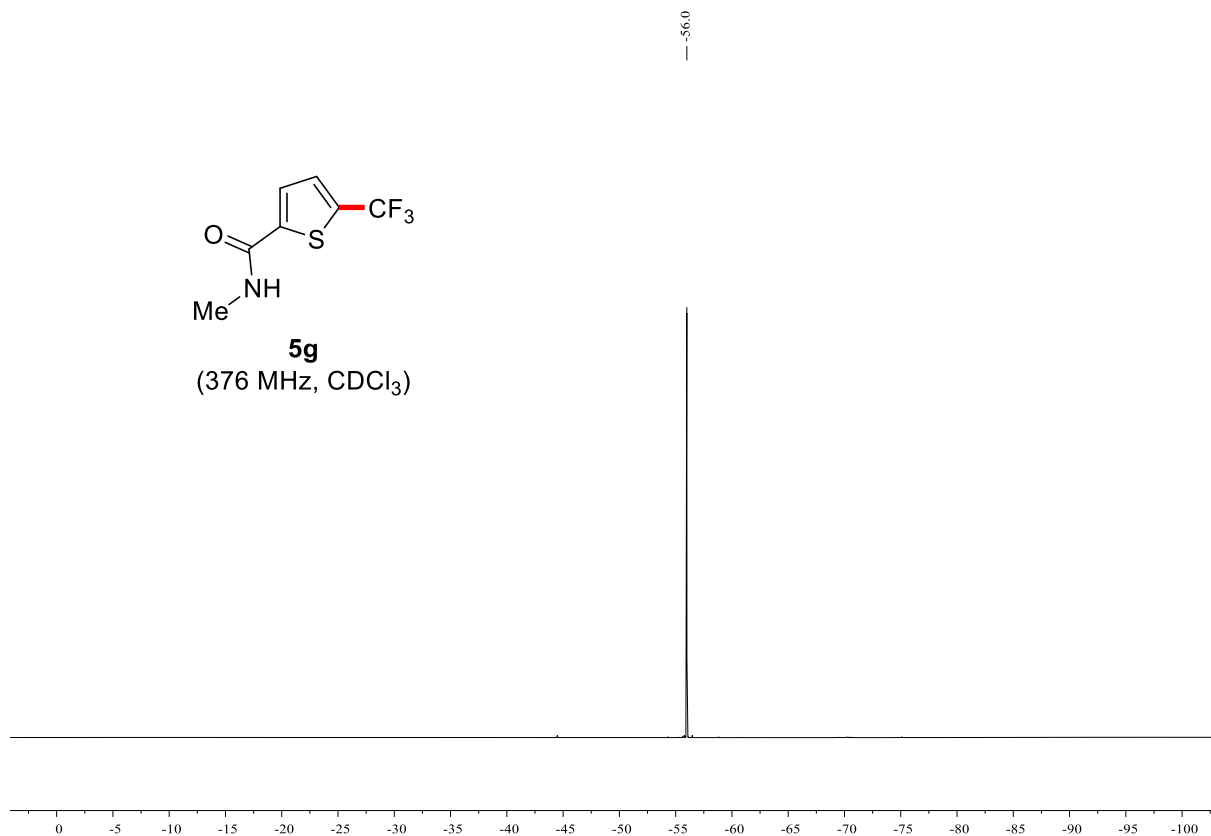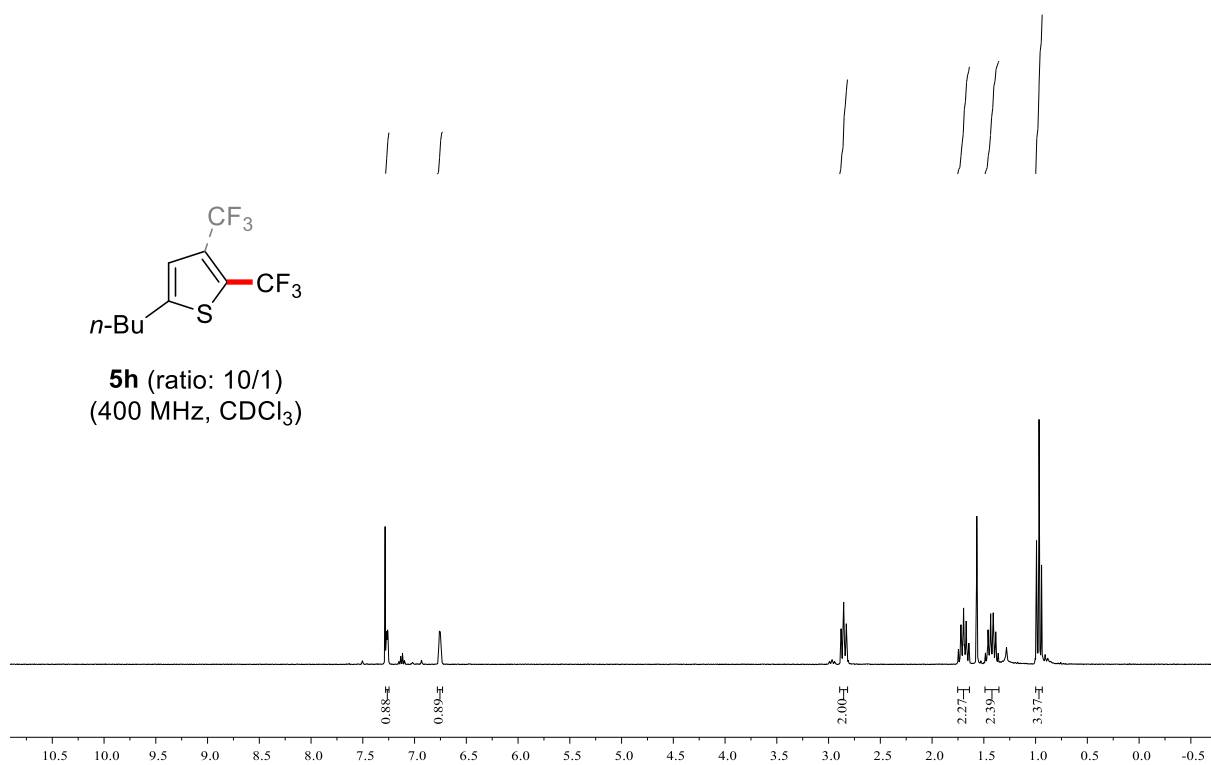

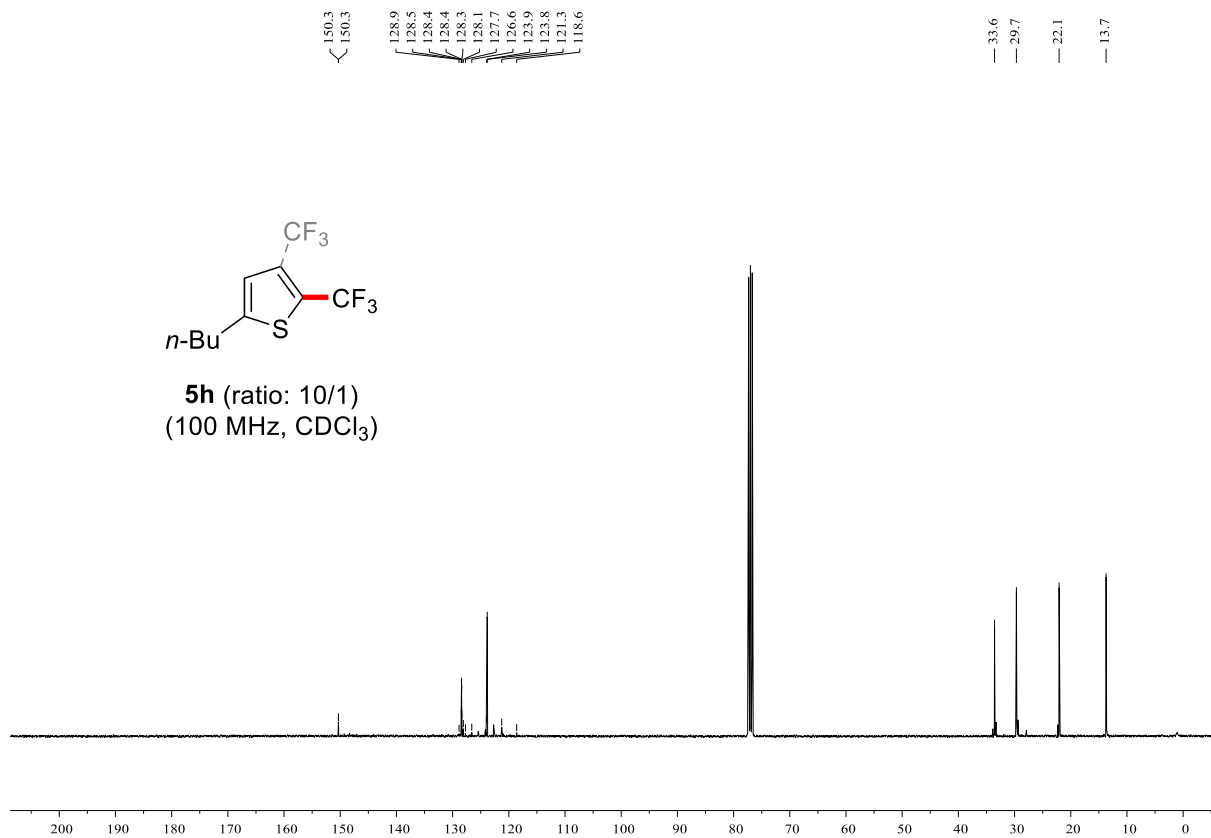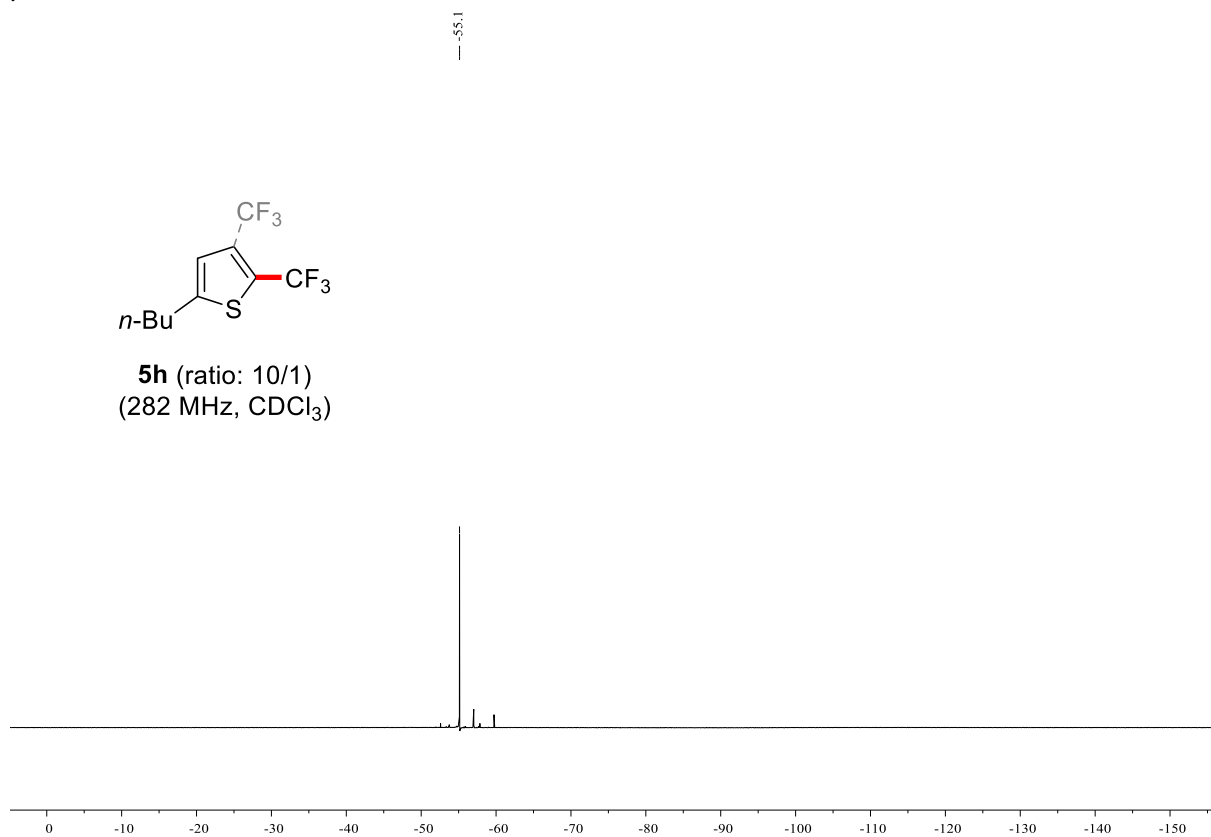

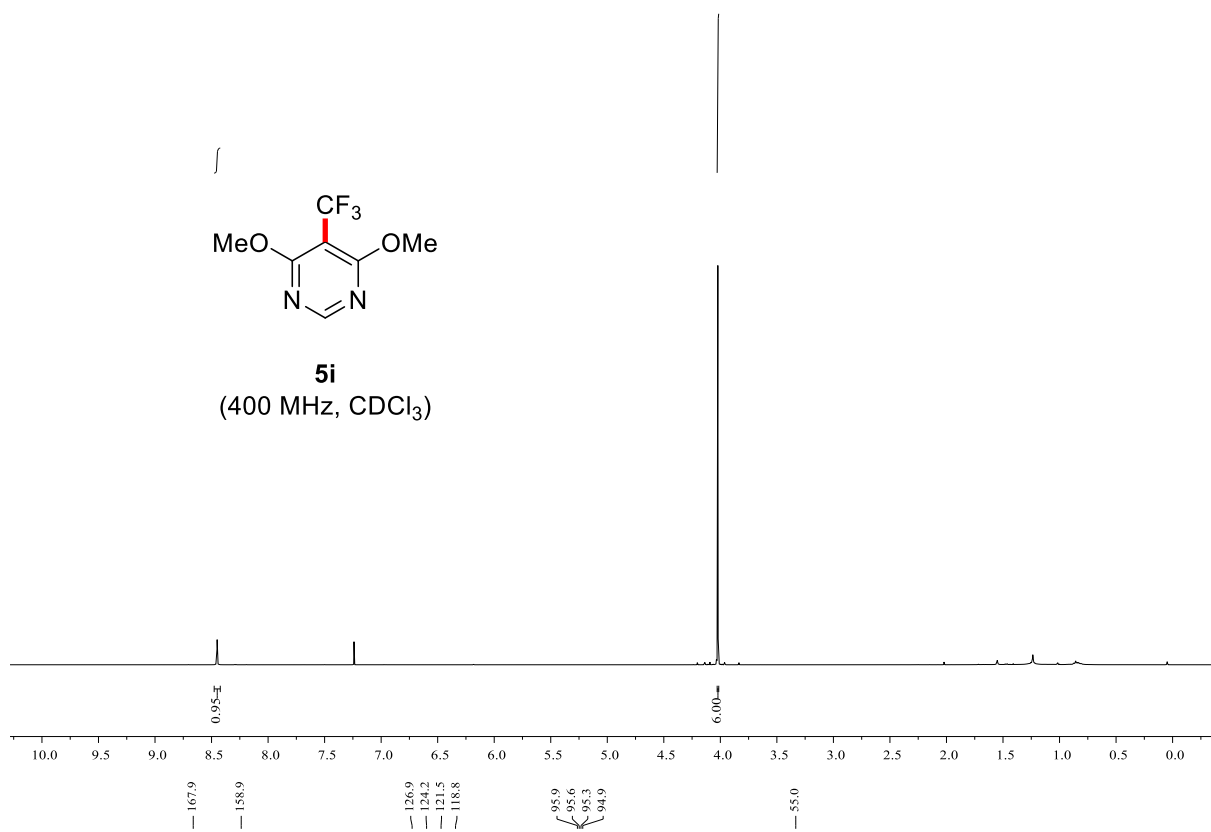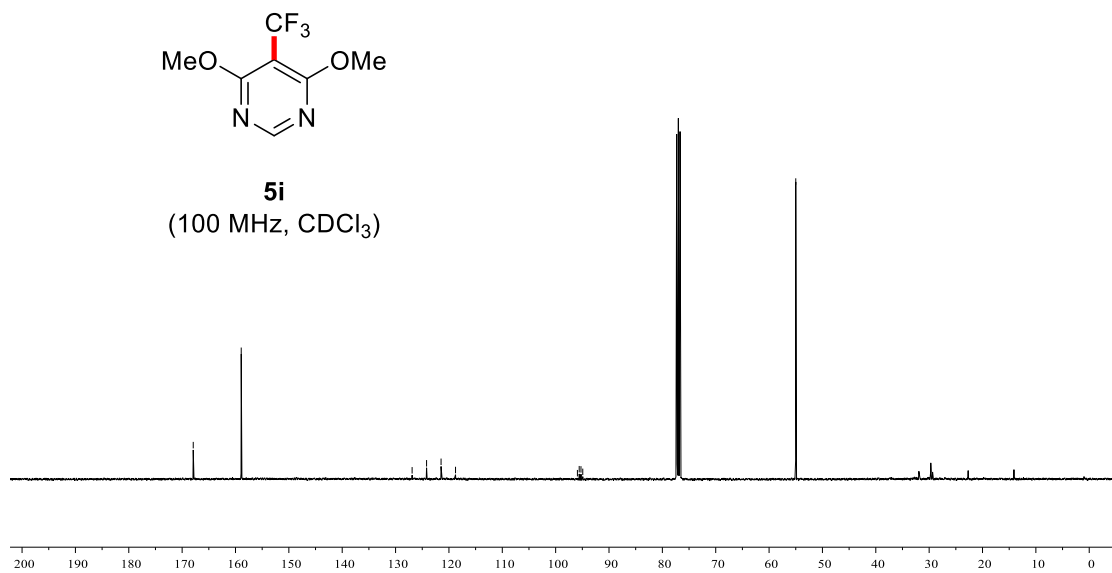

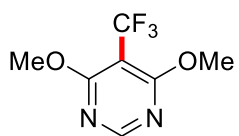

**5i**  
(376 MHz, CDCl<sub>3</sub>)

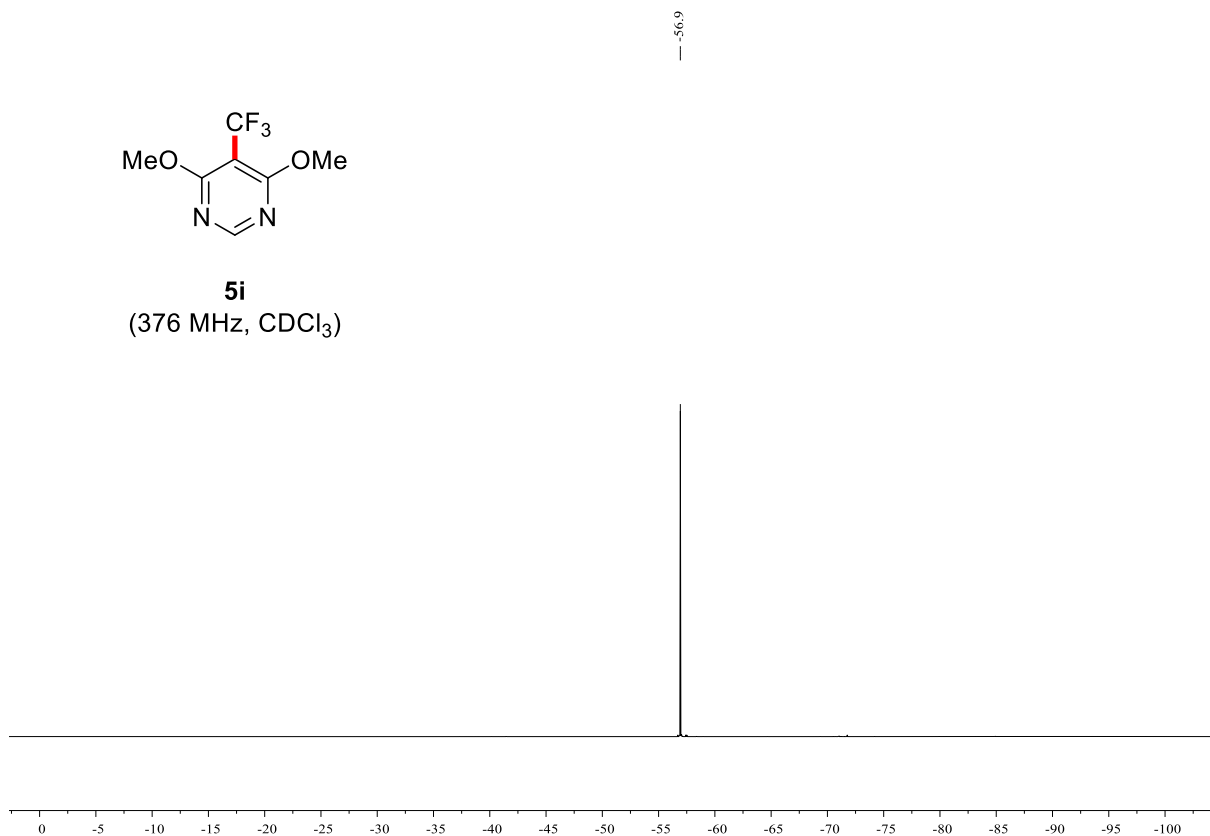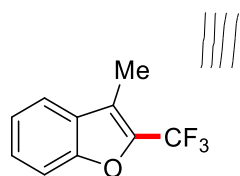

**5j**  
(400 MHz, CDCl<sub>3</sub>)

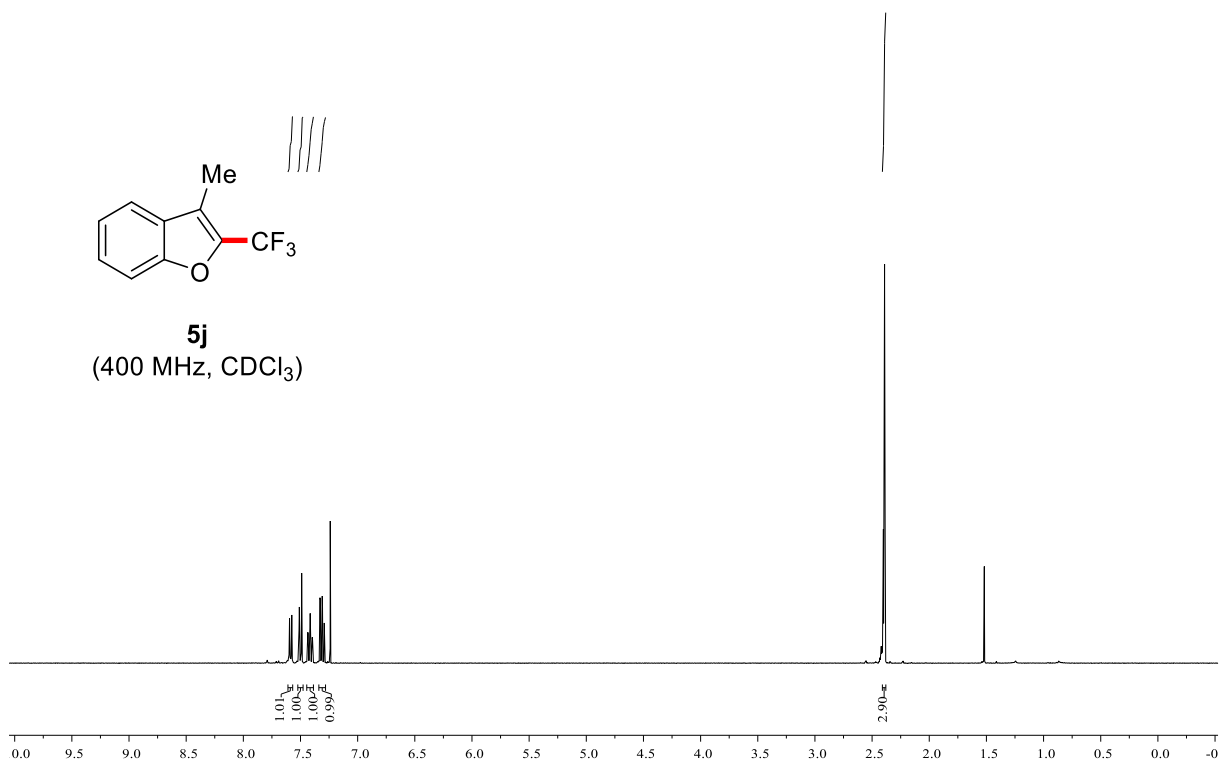

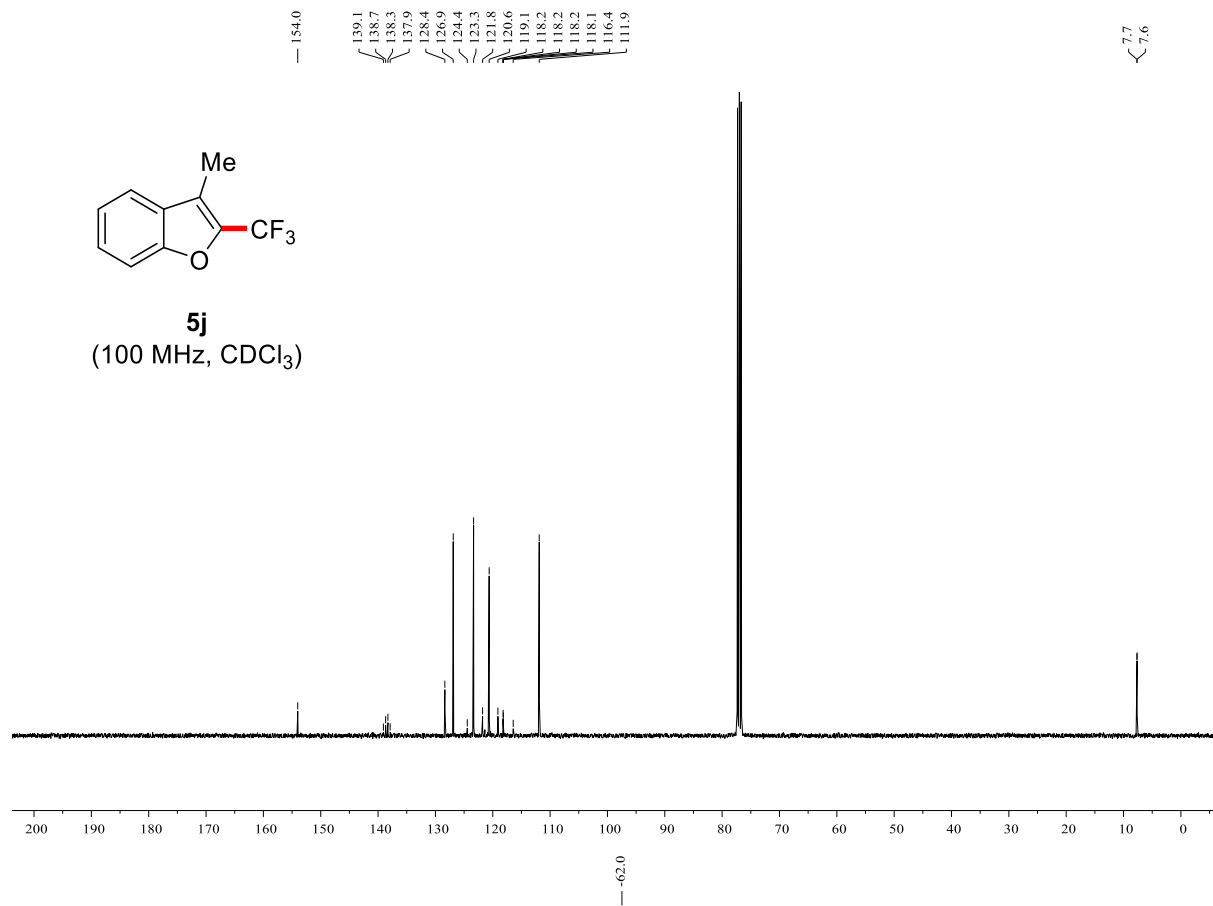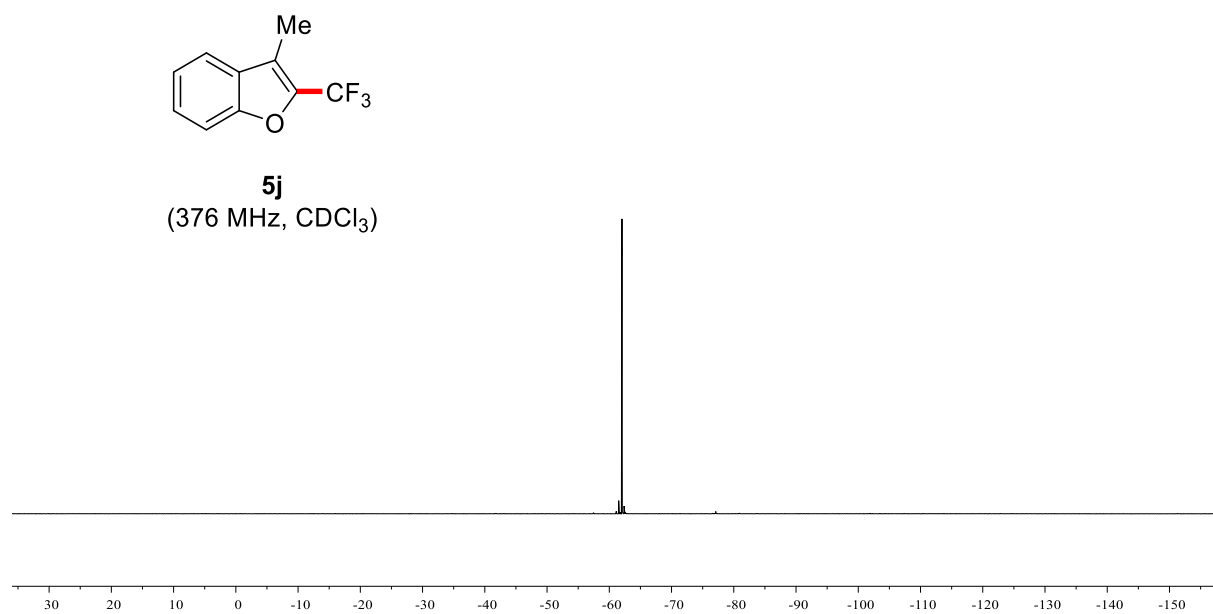

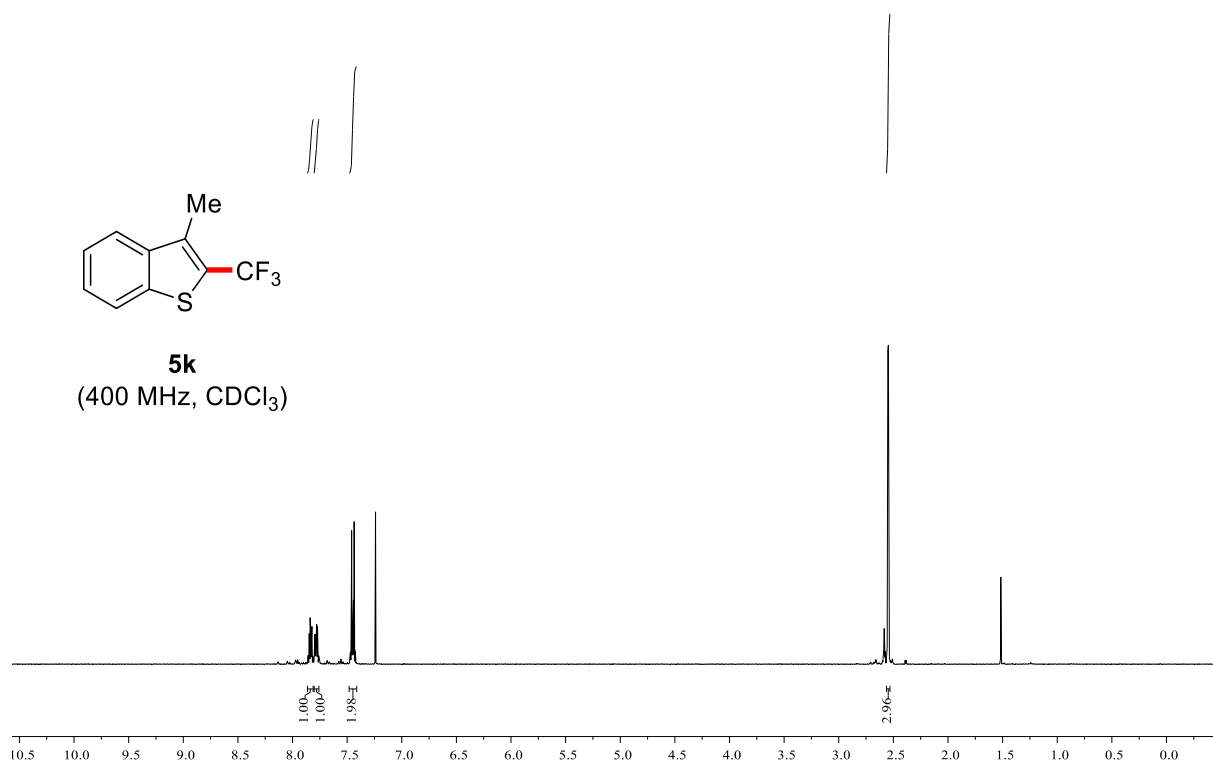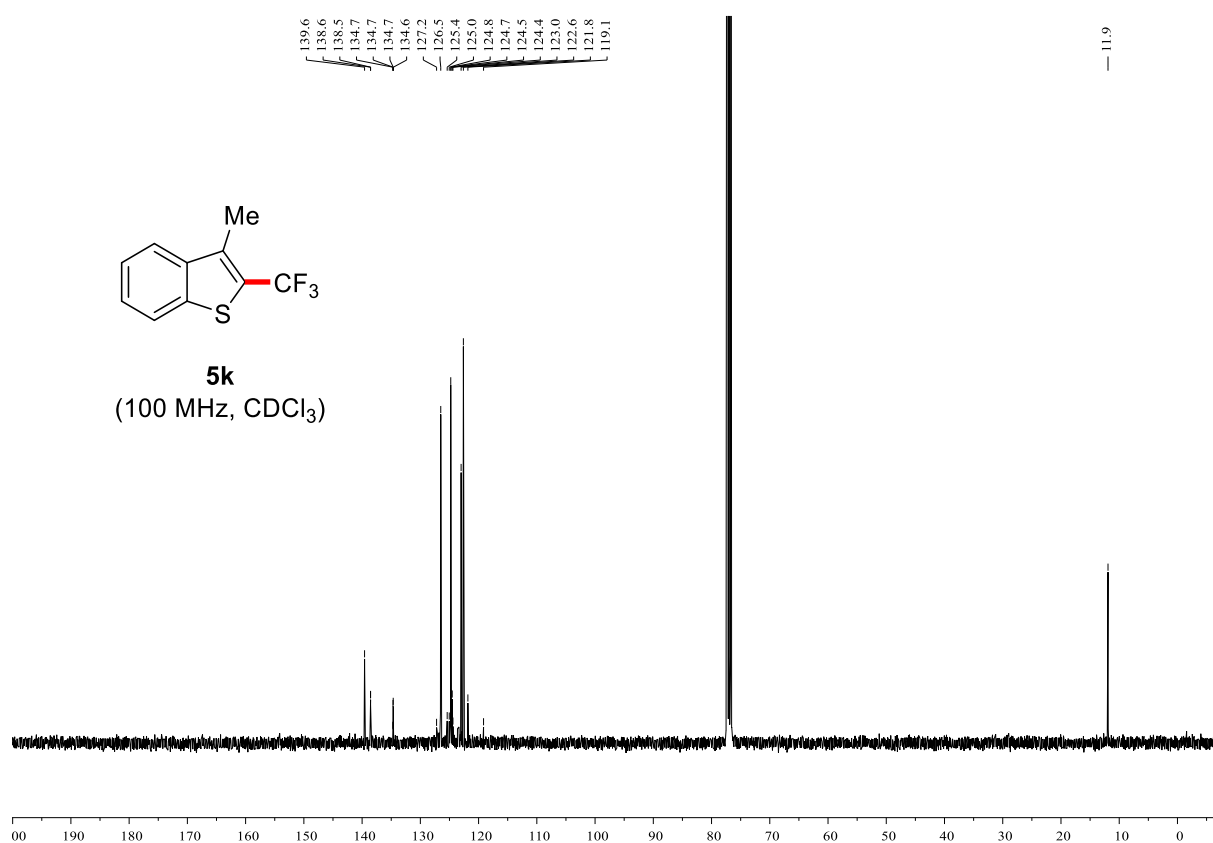

-54.1

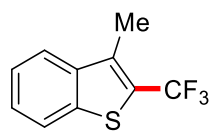

**5k**  
(282 MHz, CDCl<sub>3</sub>)

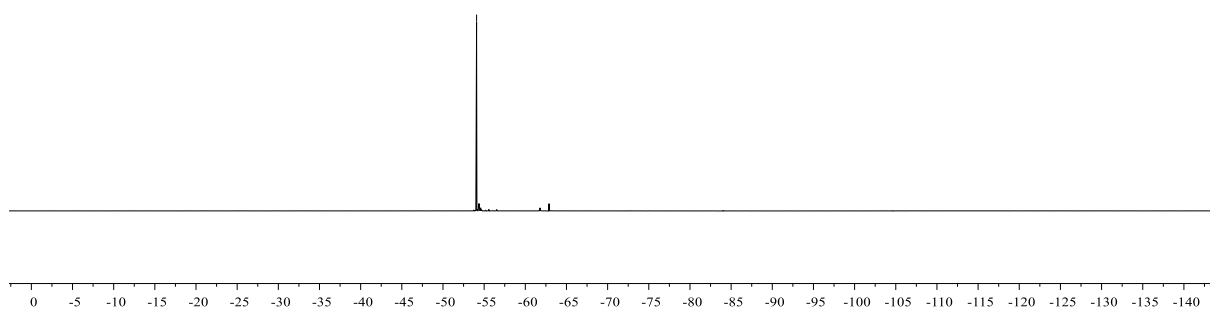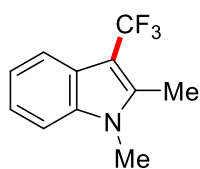

**5l**  
(400 MHz, CDCl<sub>3</sub>)

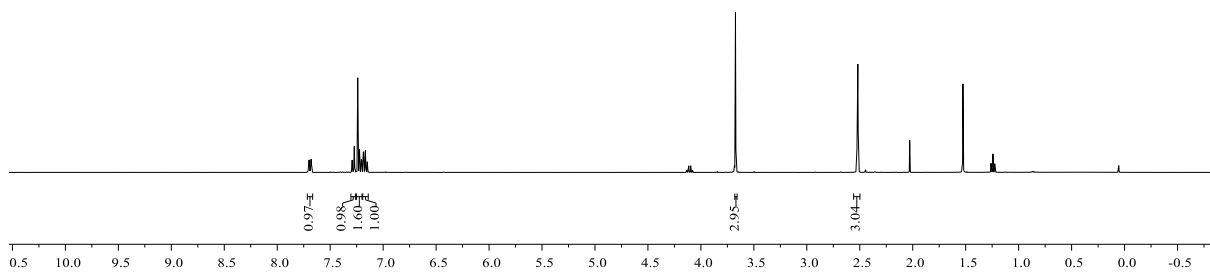

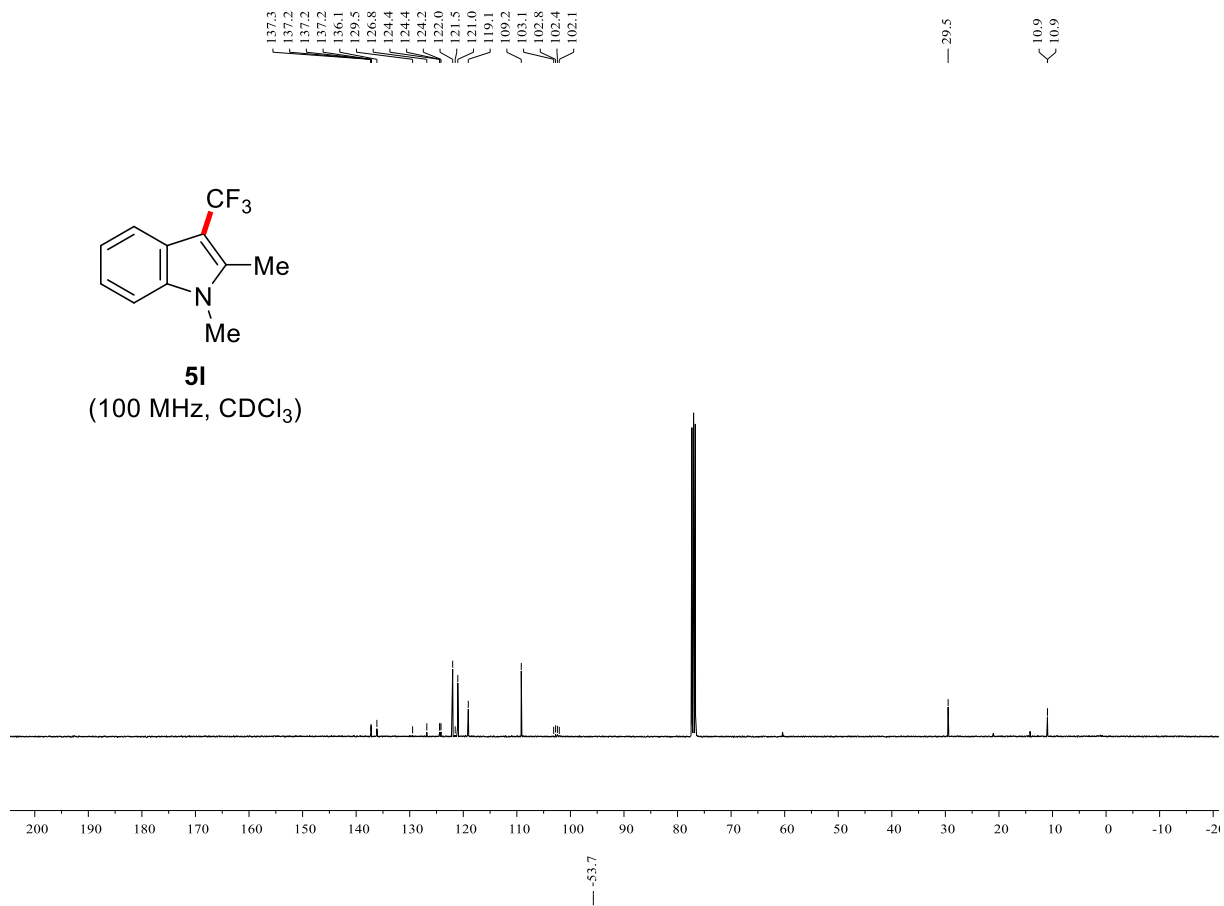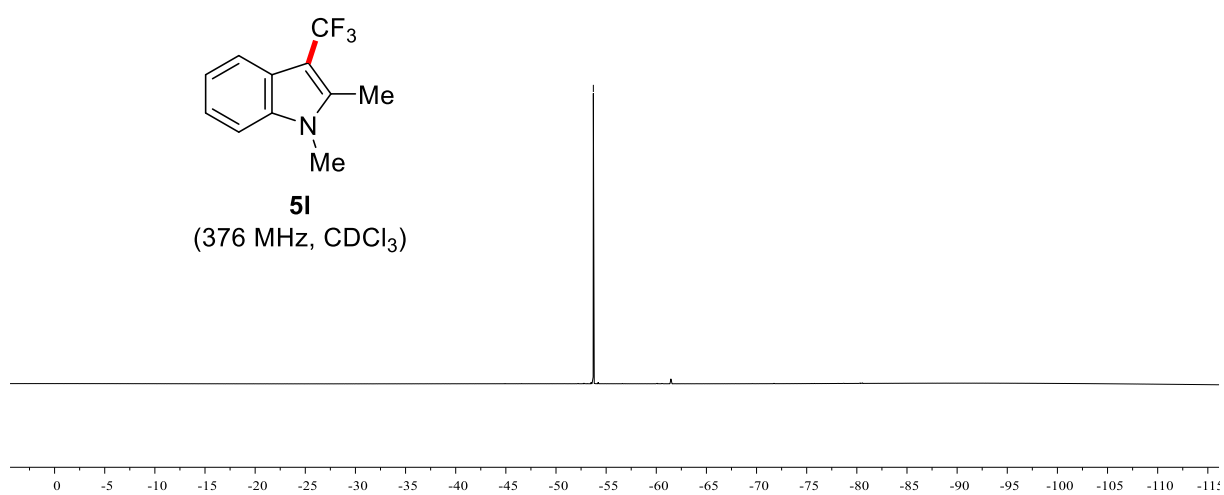



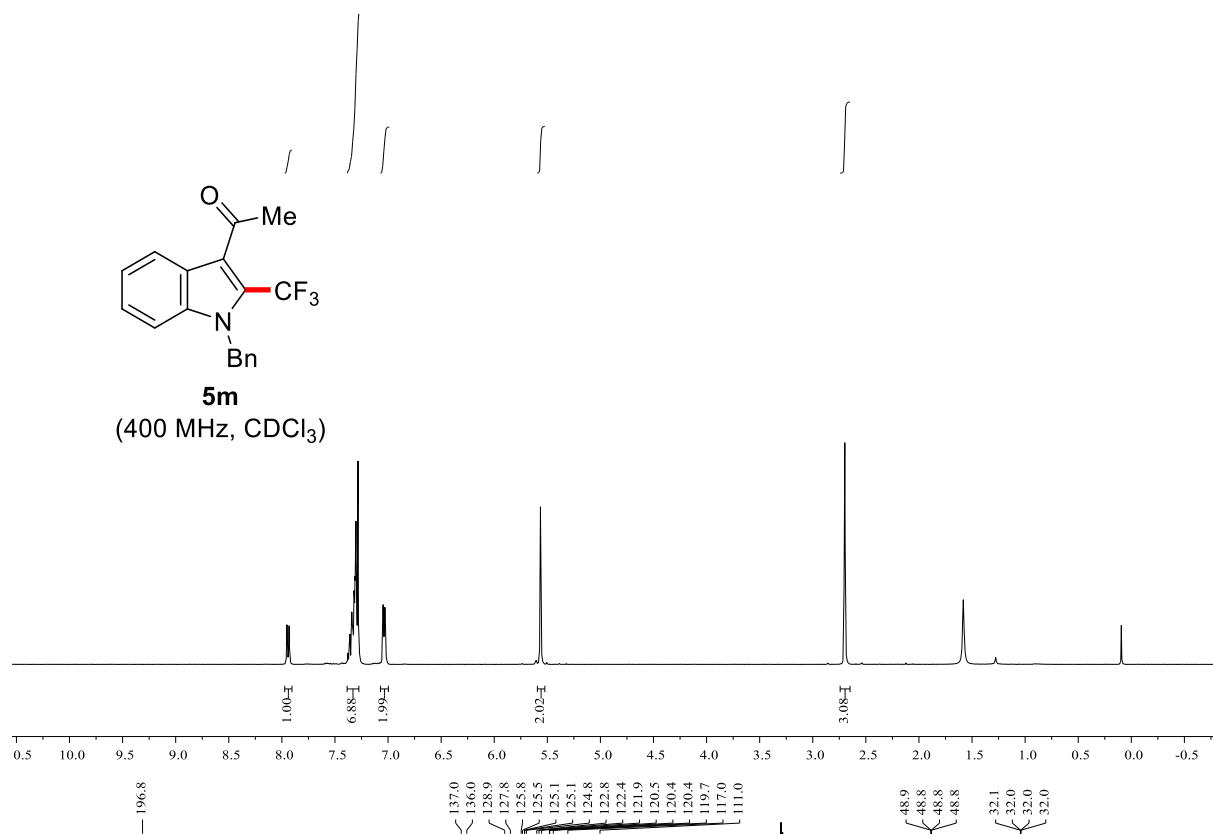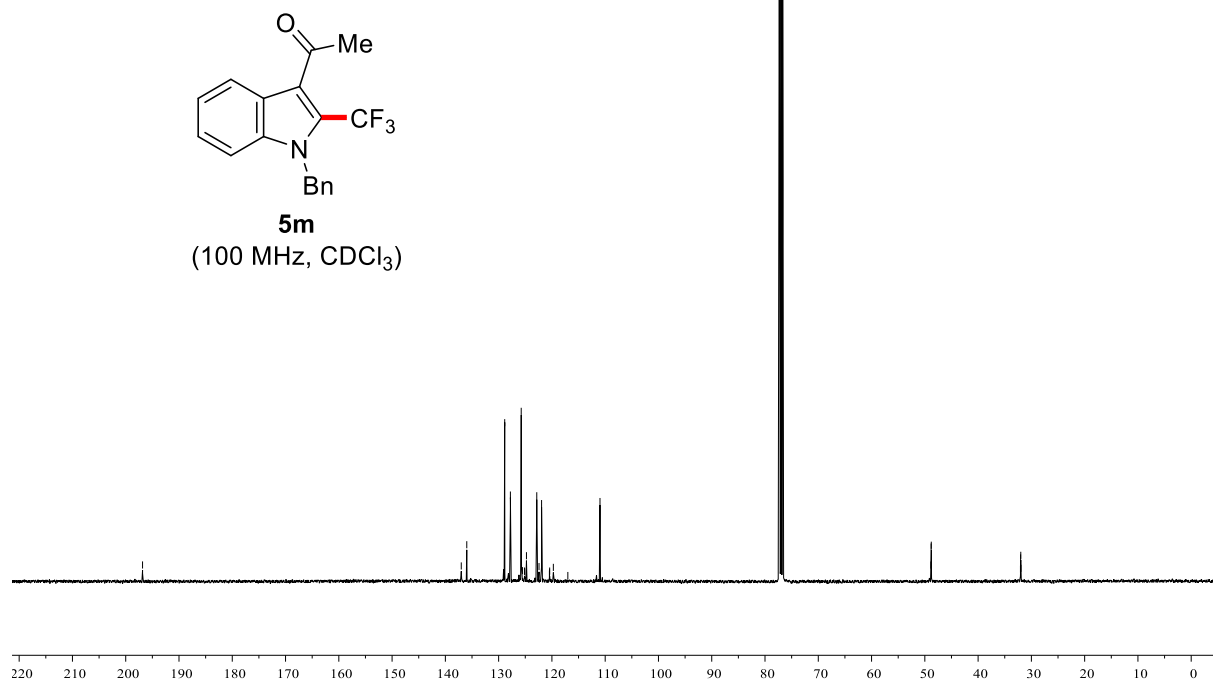

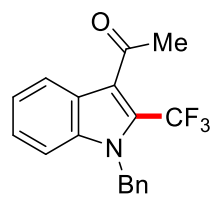

**5m**  
(282 MHz, CDCl<sub>3</sub>)

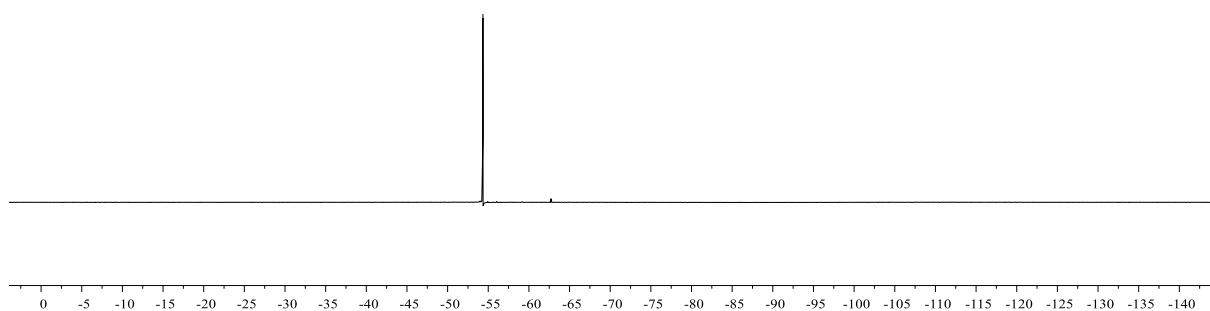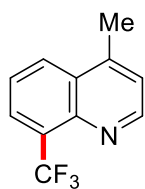

**5n** (ratio: 20/1)  
(500 MHz, CDCl<sub>3</sub>)

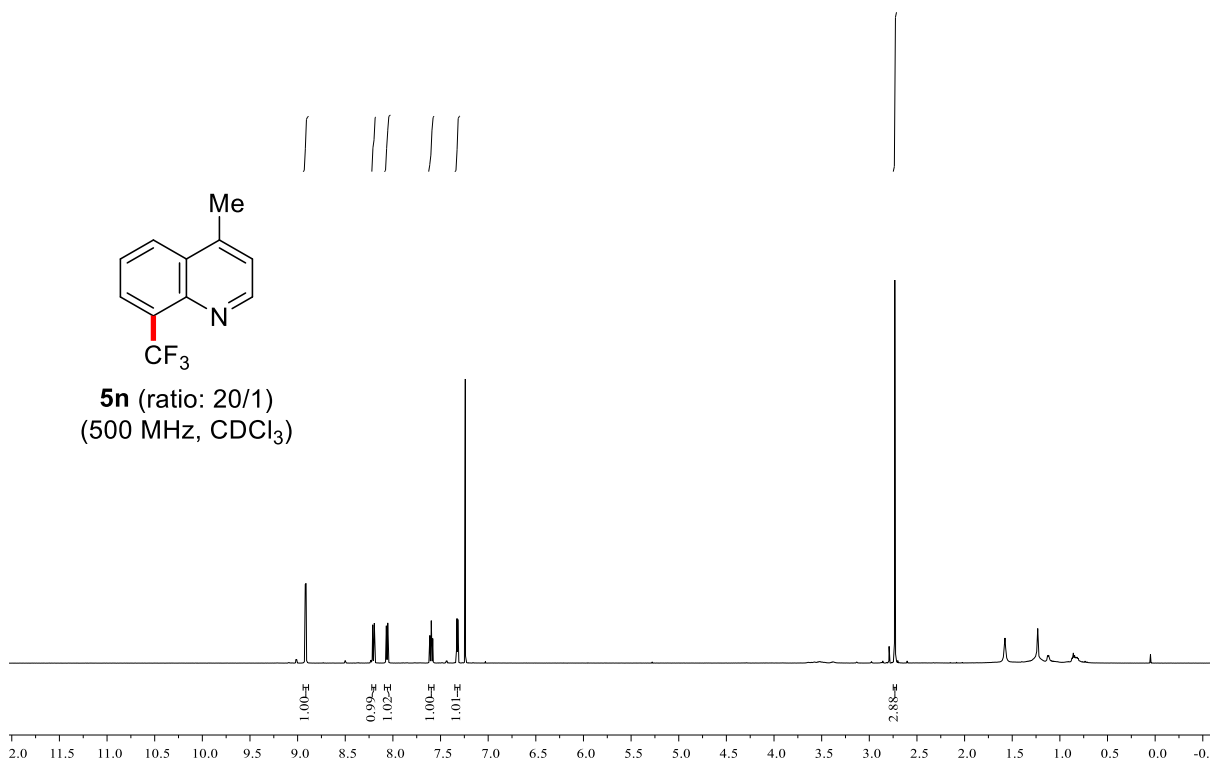

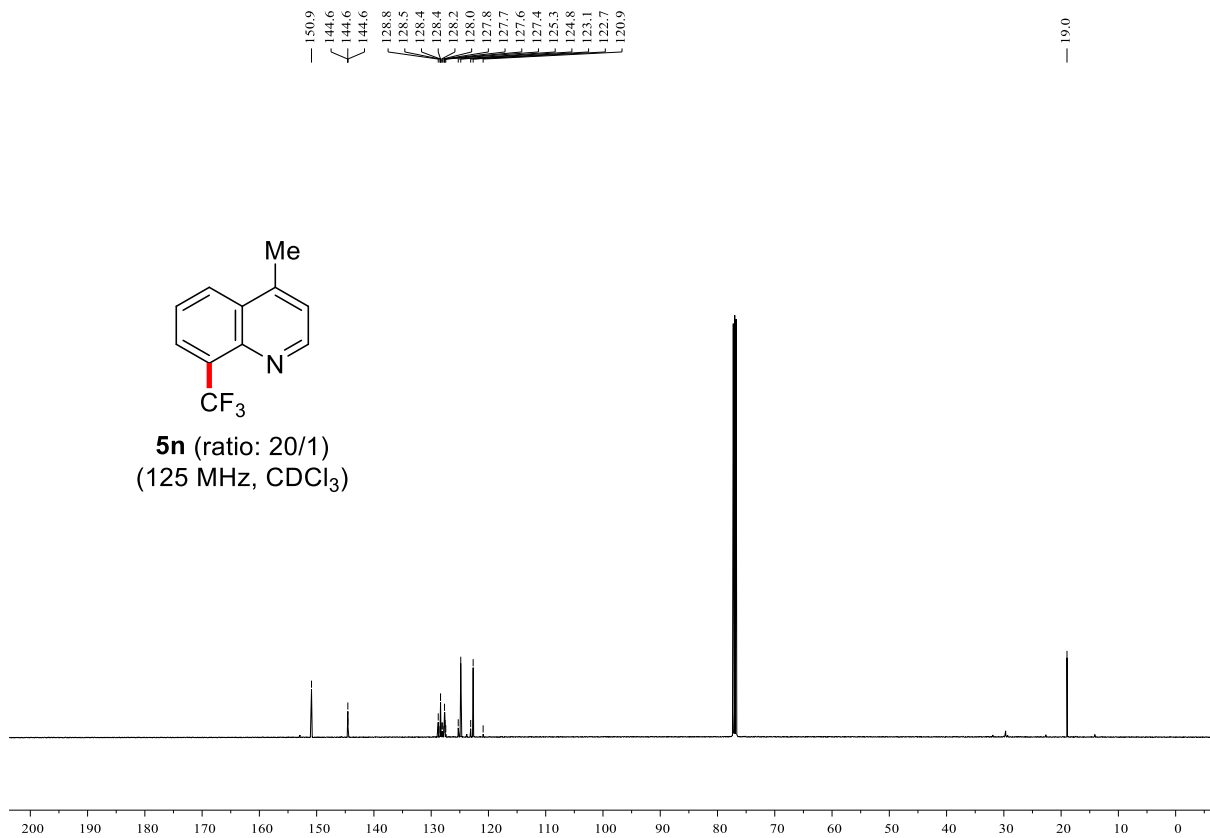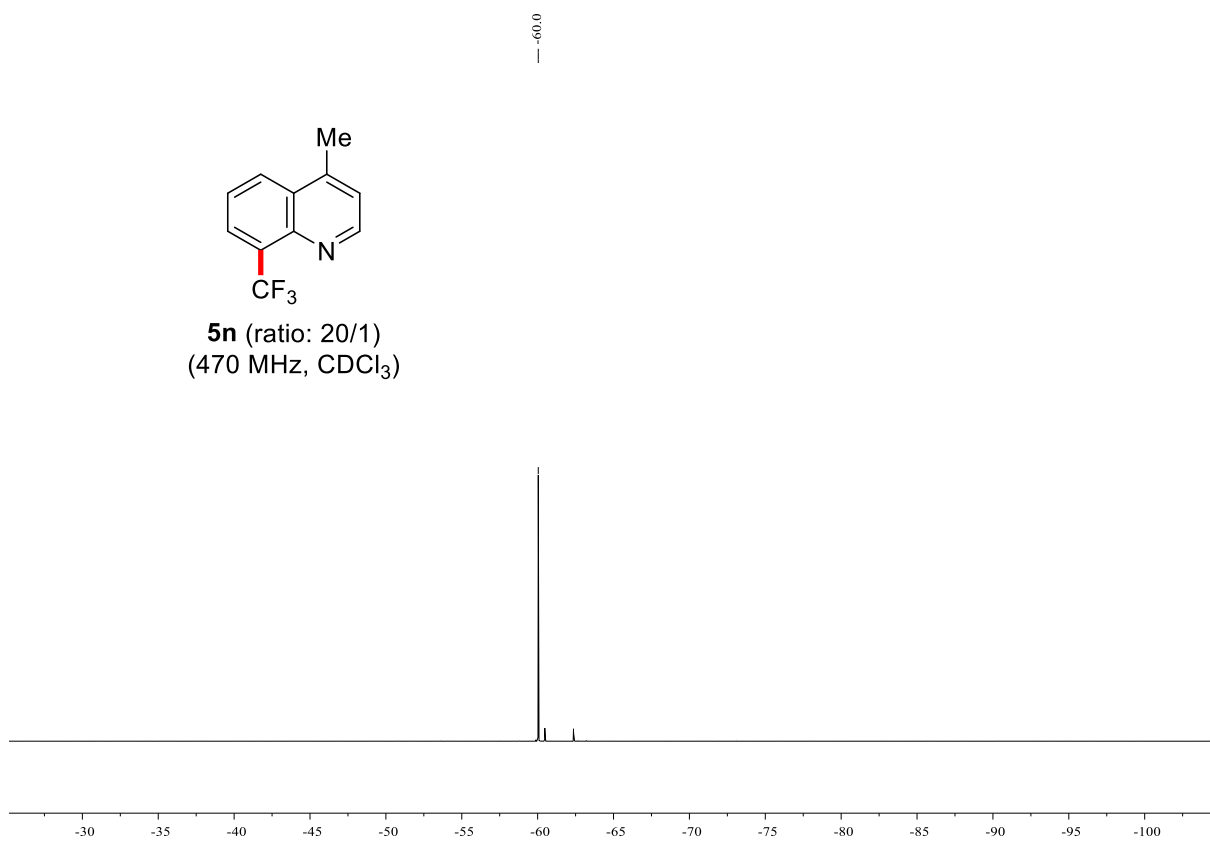

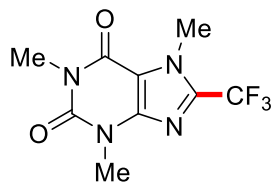

**6**  
(400 MHz, CDCl<sub>3</sub>)

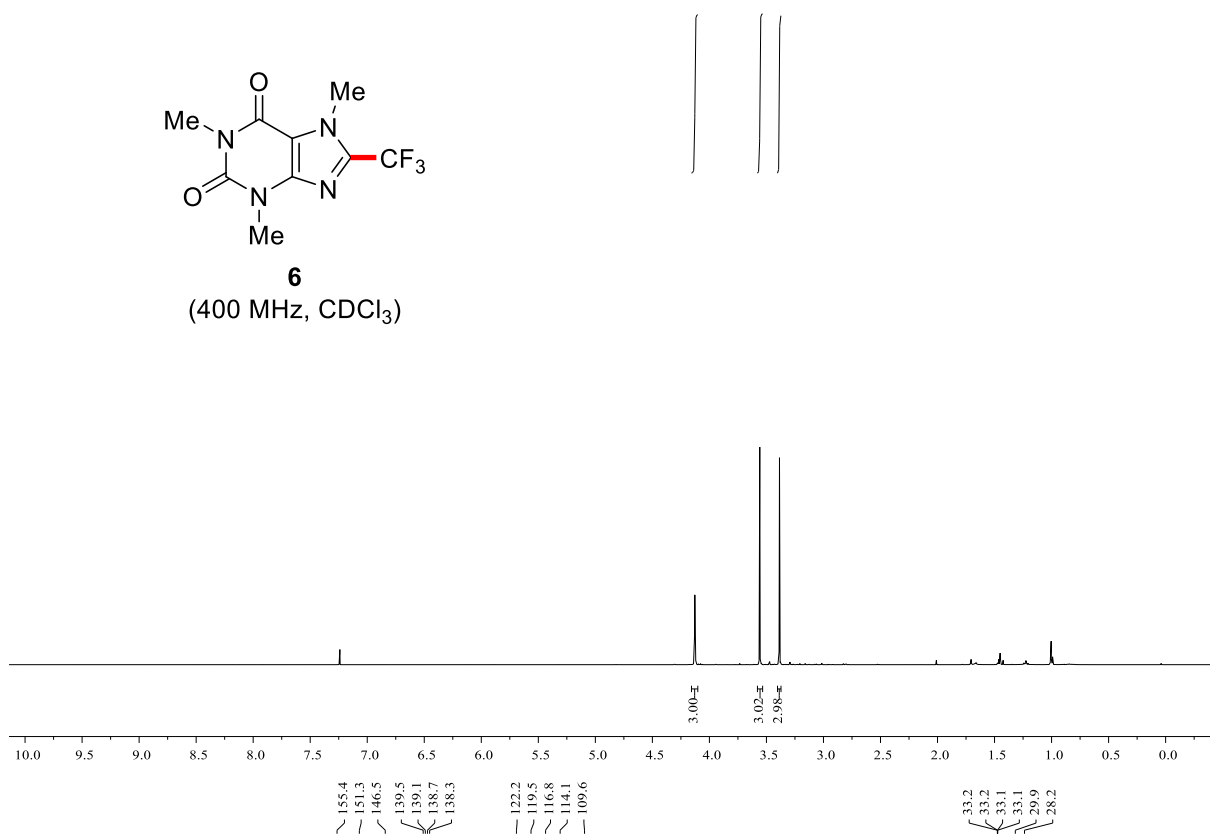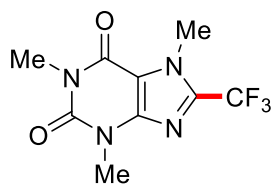

**6**  
(100 MHz, CDCl<sub>3</sub>)

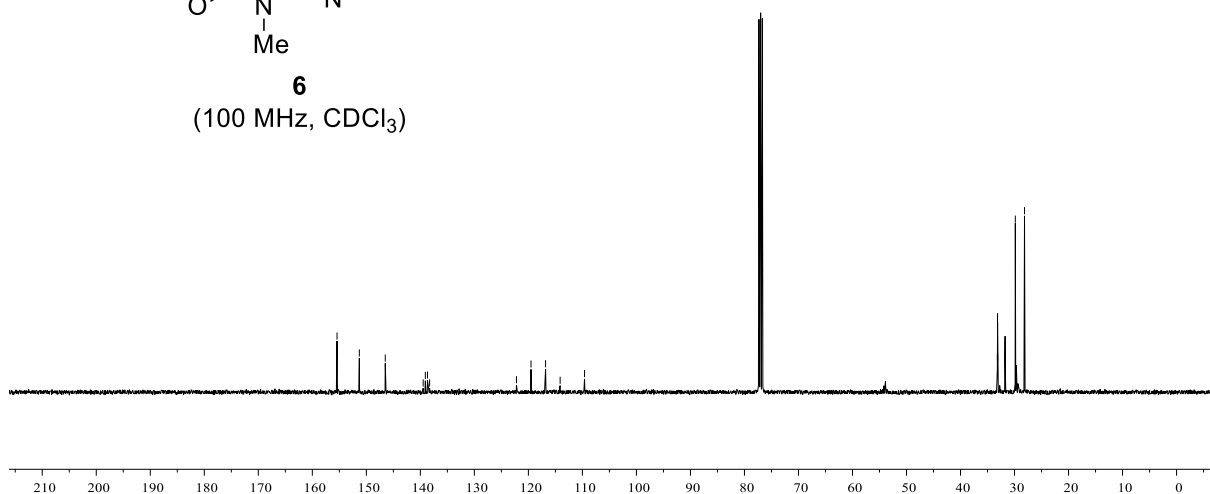

-62.4

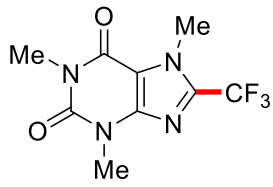

**6**

(376 MHz, CDCl<sub>3</sub>)

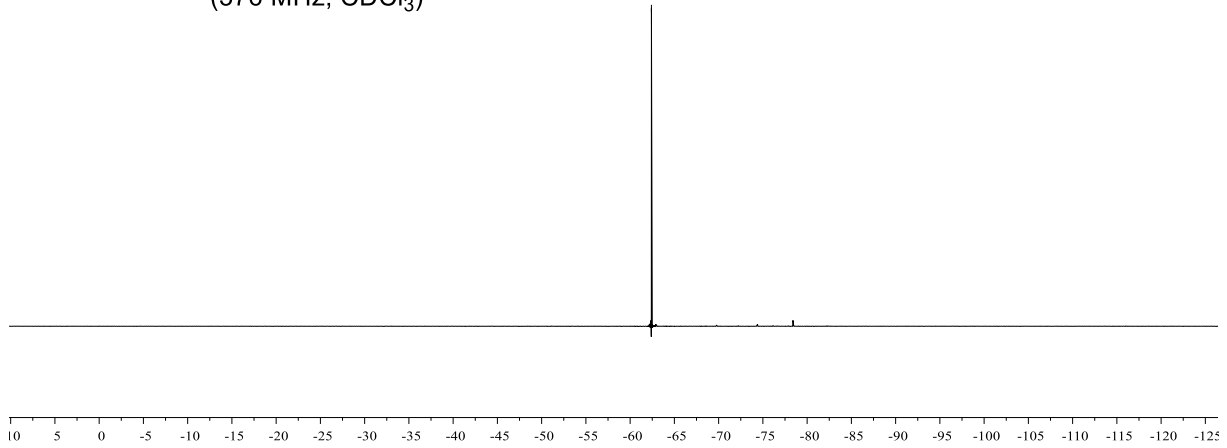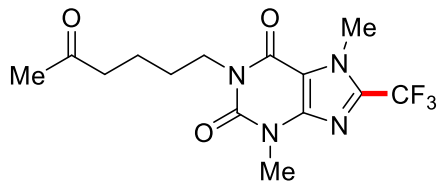

**7**

(400 MHz, CDCl<sub>3</sub>)

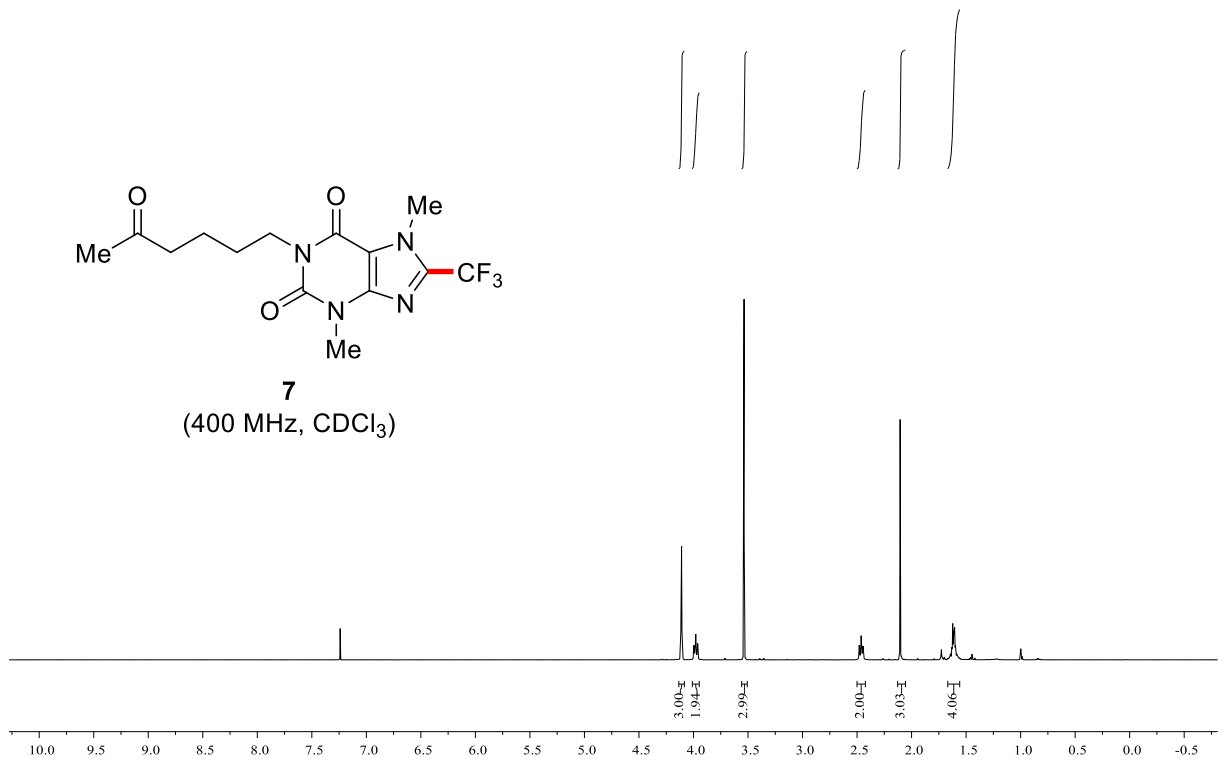

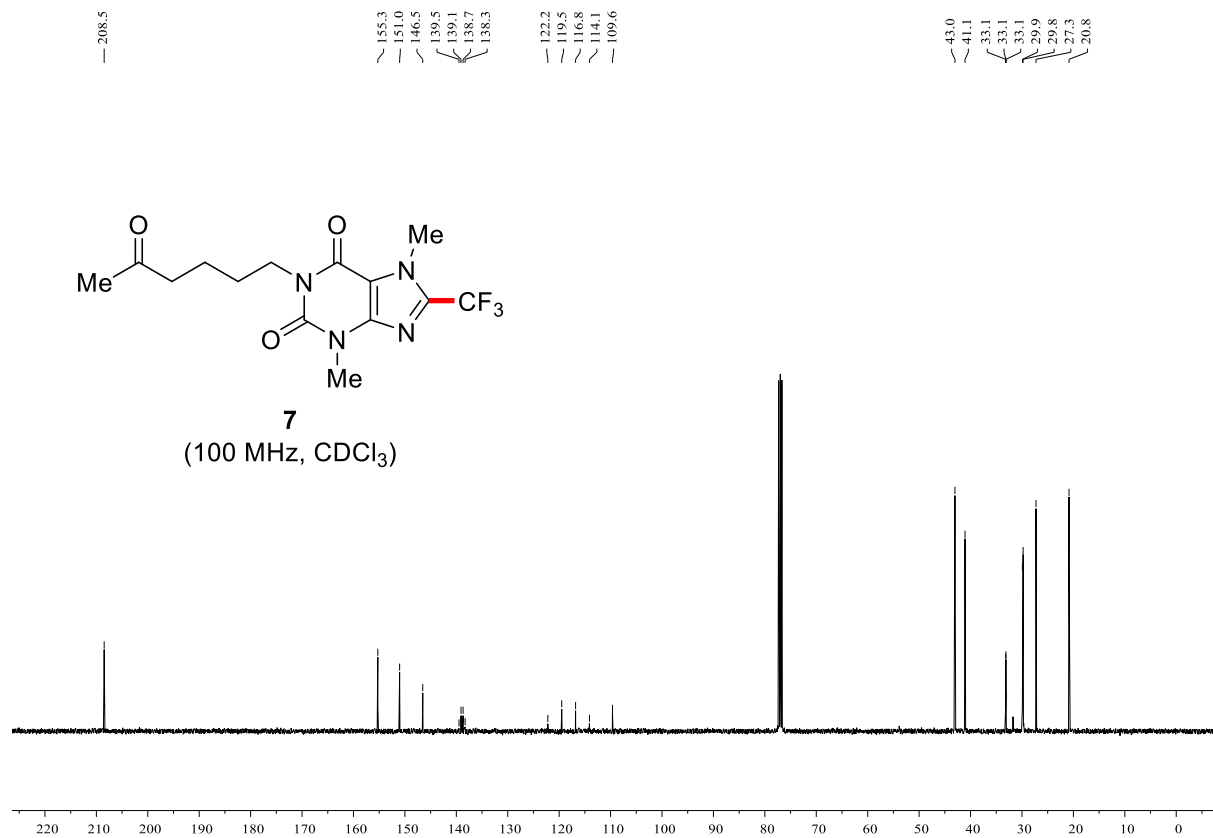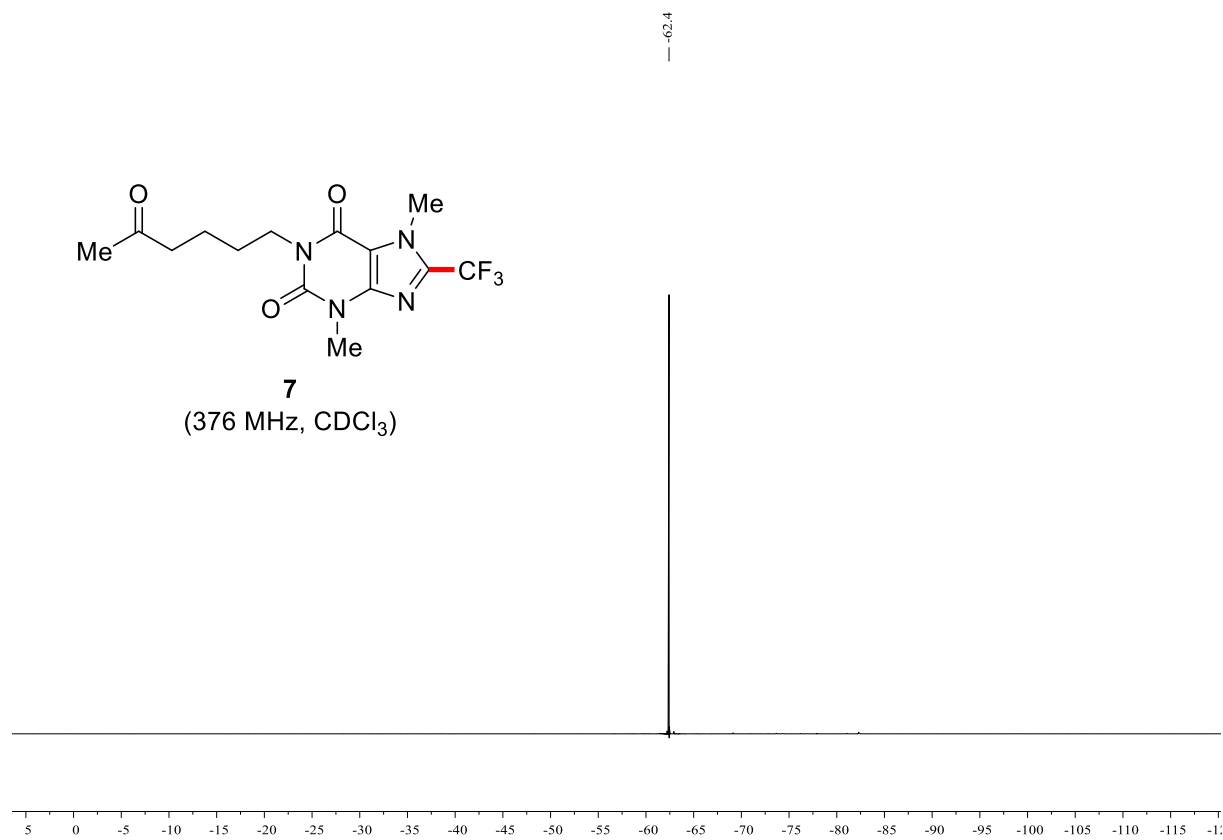

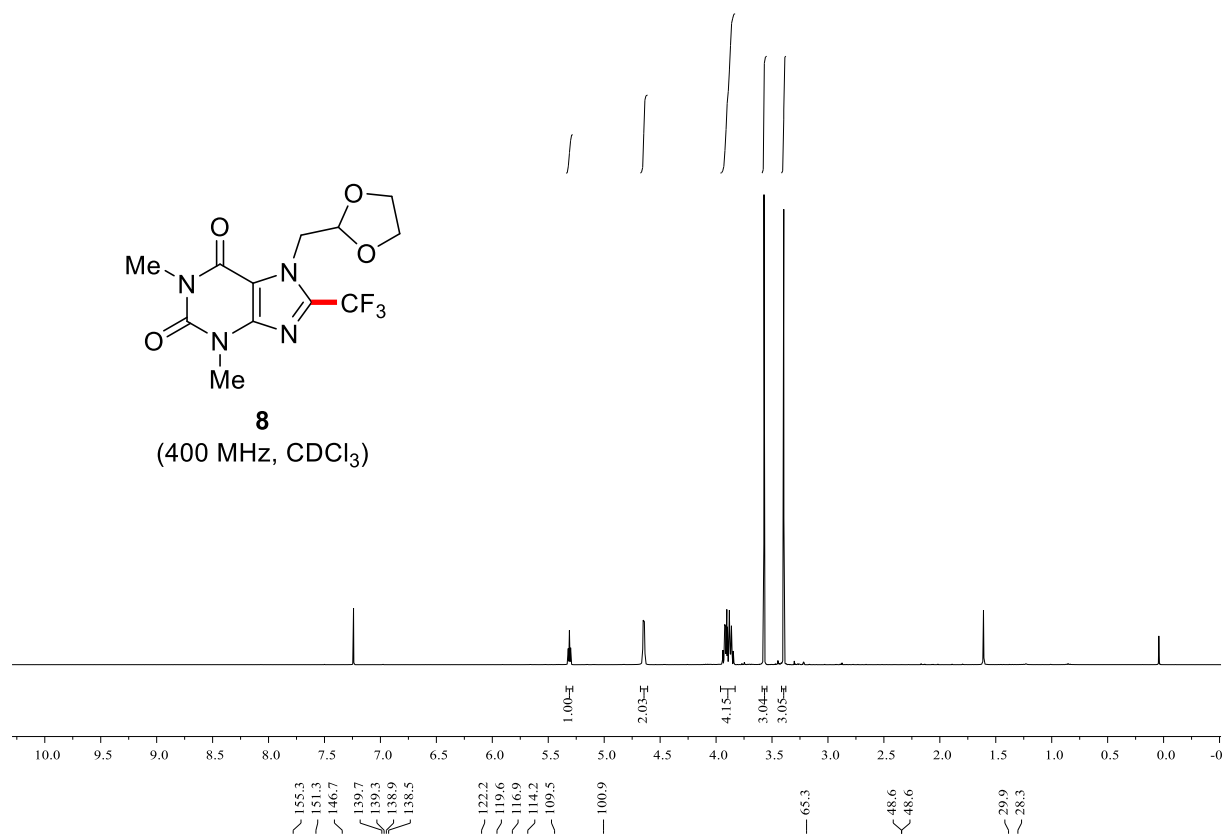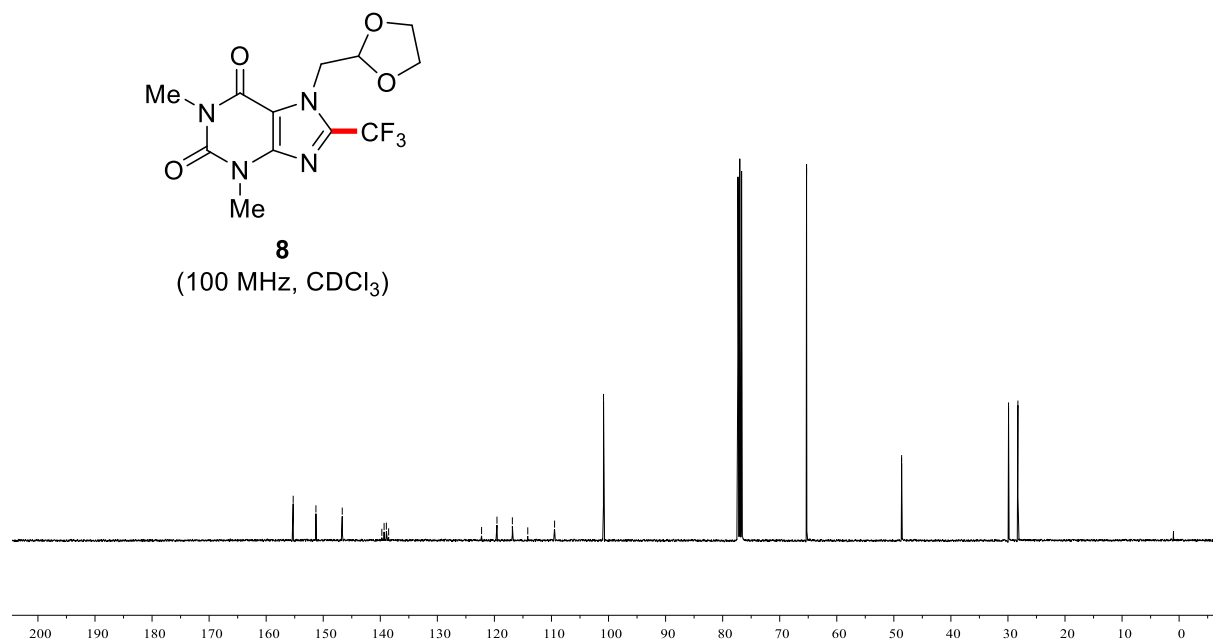

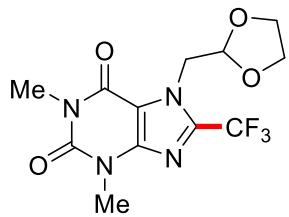

**8**

(376 MHz, CDCl<sub>3</sub>)

-62.4

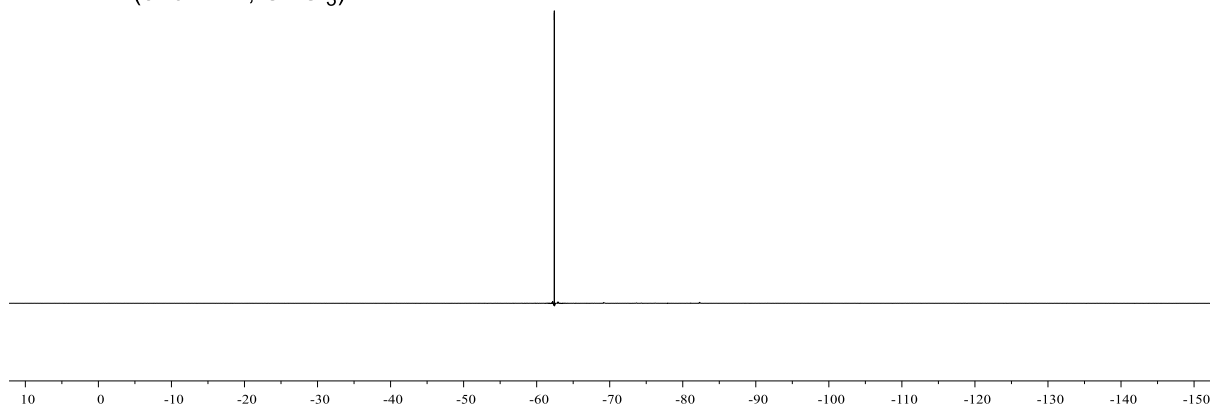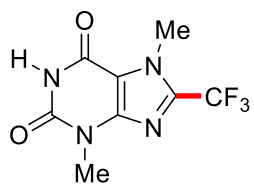

**9**

(500 MHz, CDCl<sub>3</sub>)

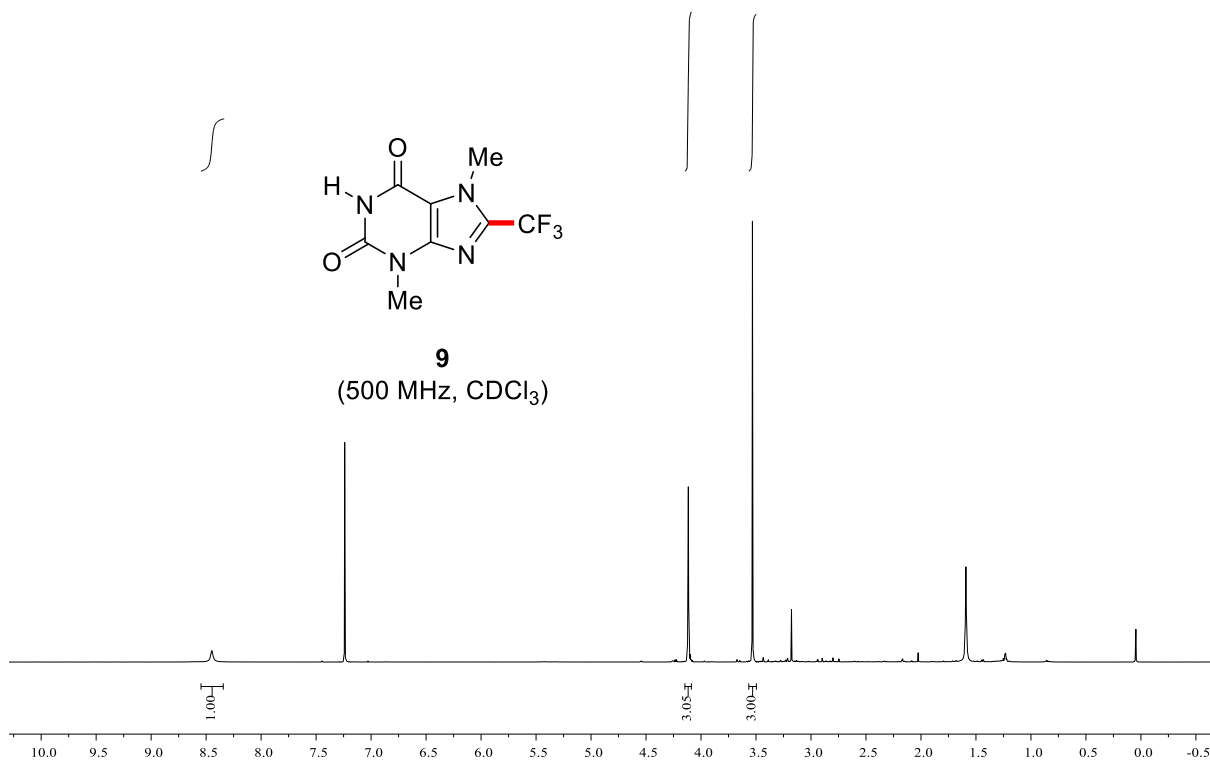



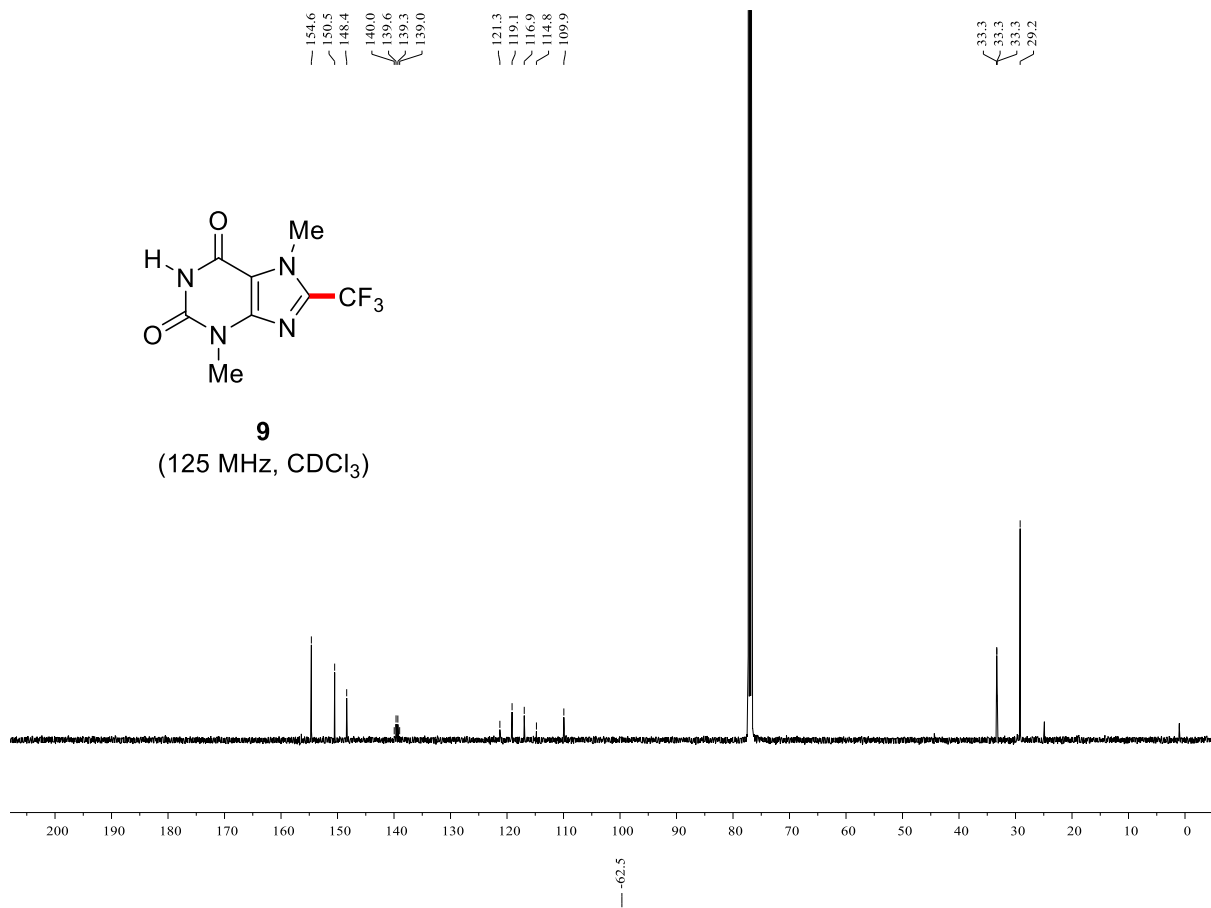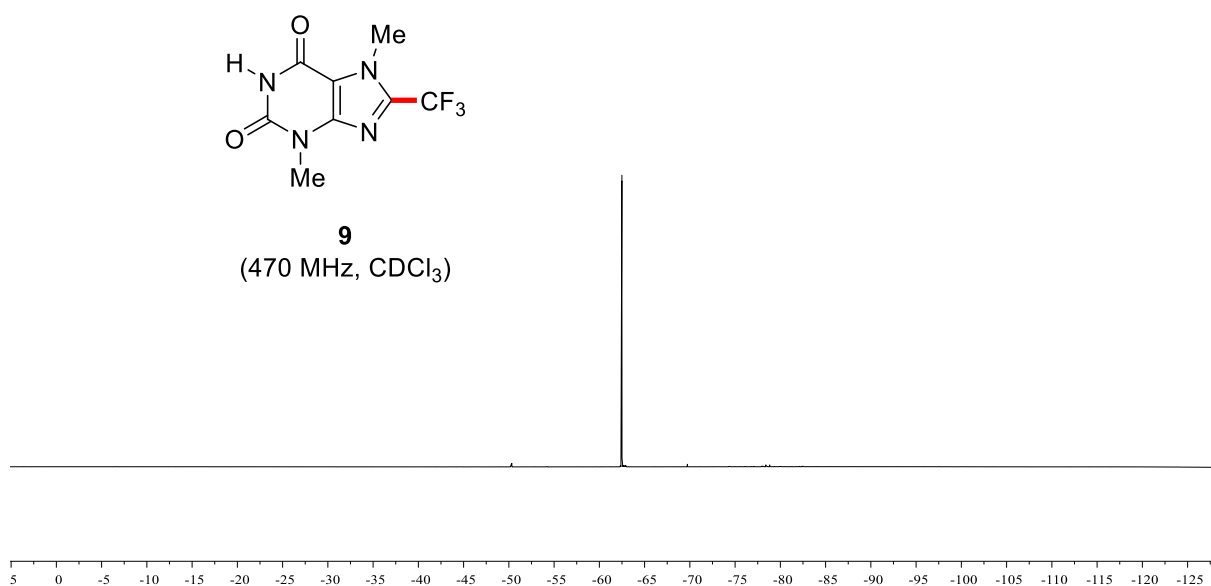

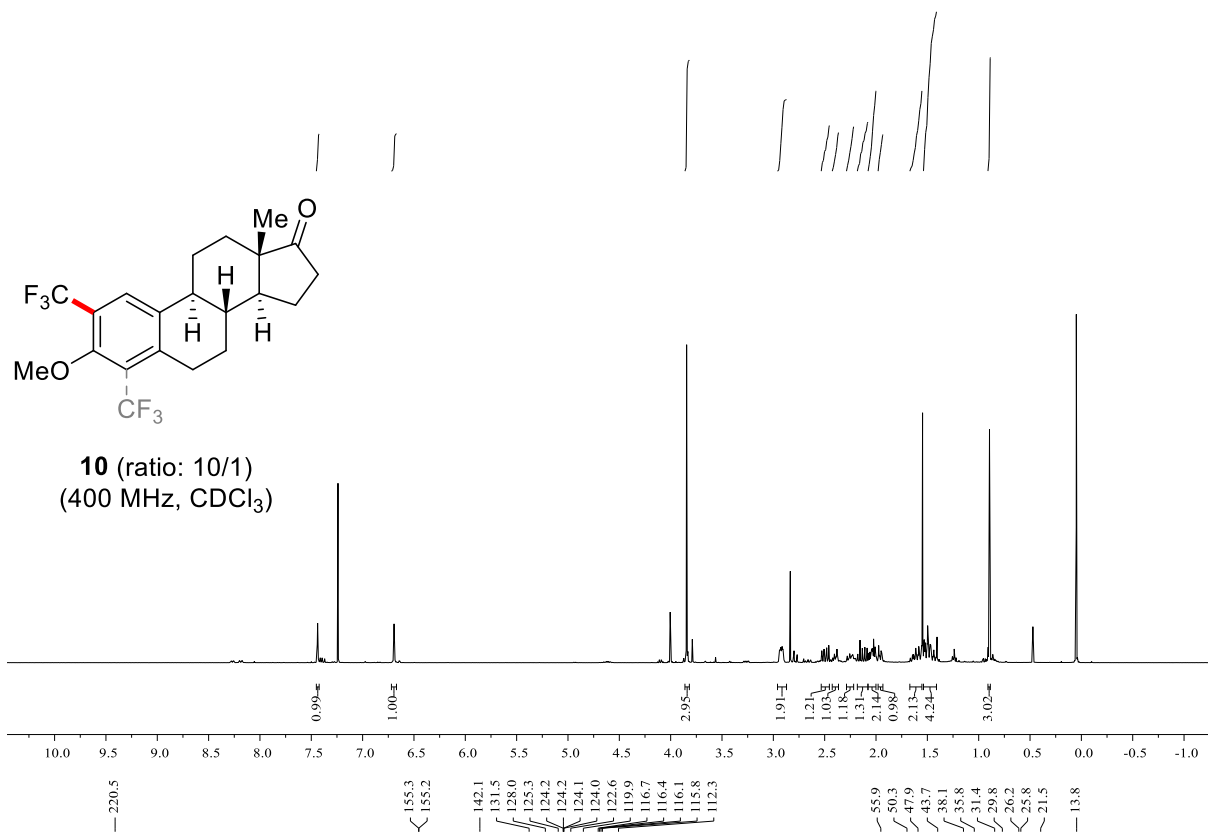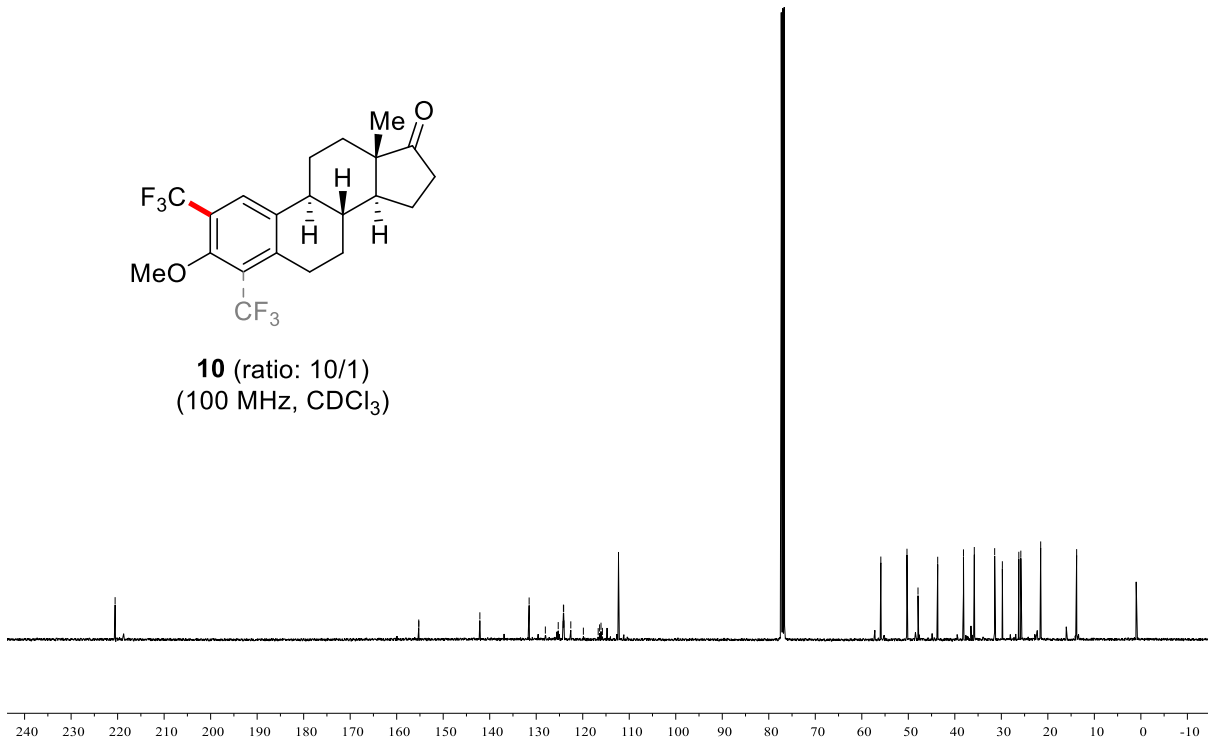

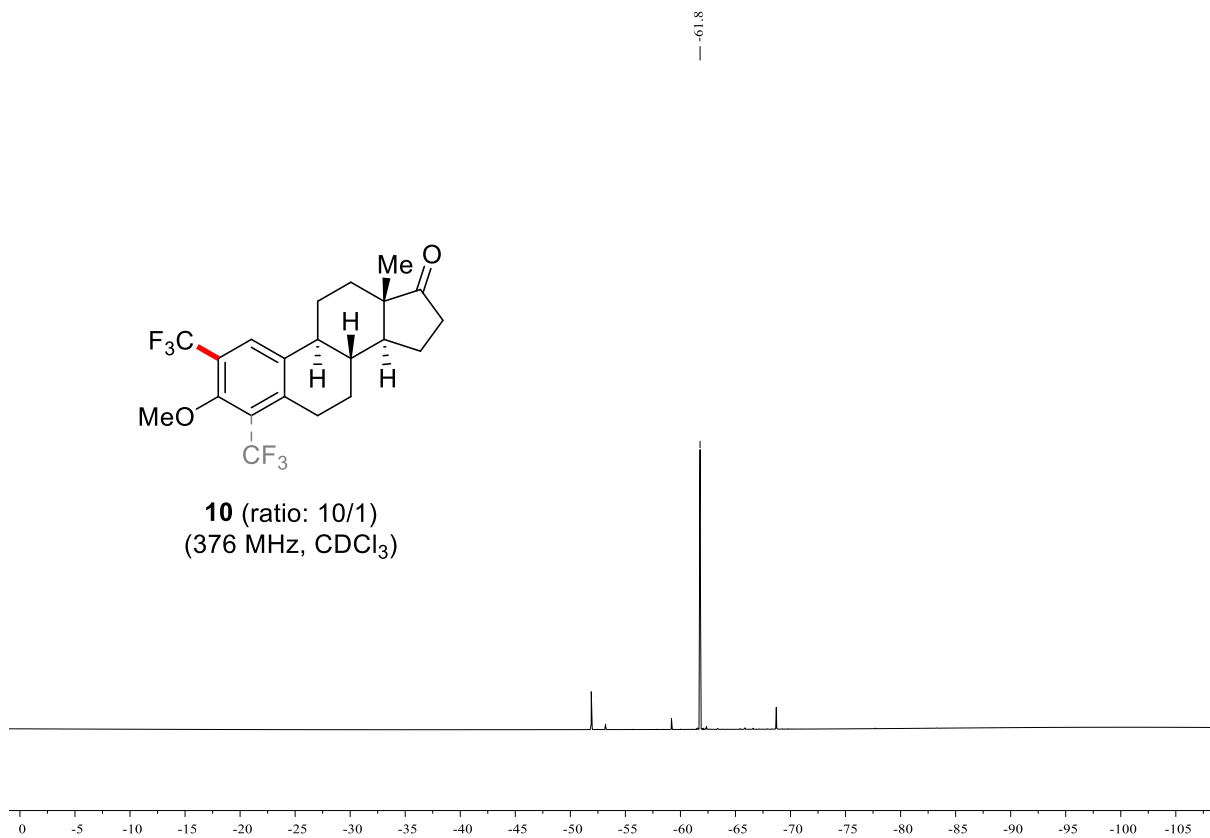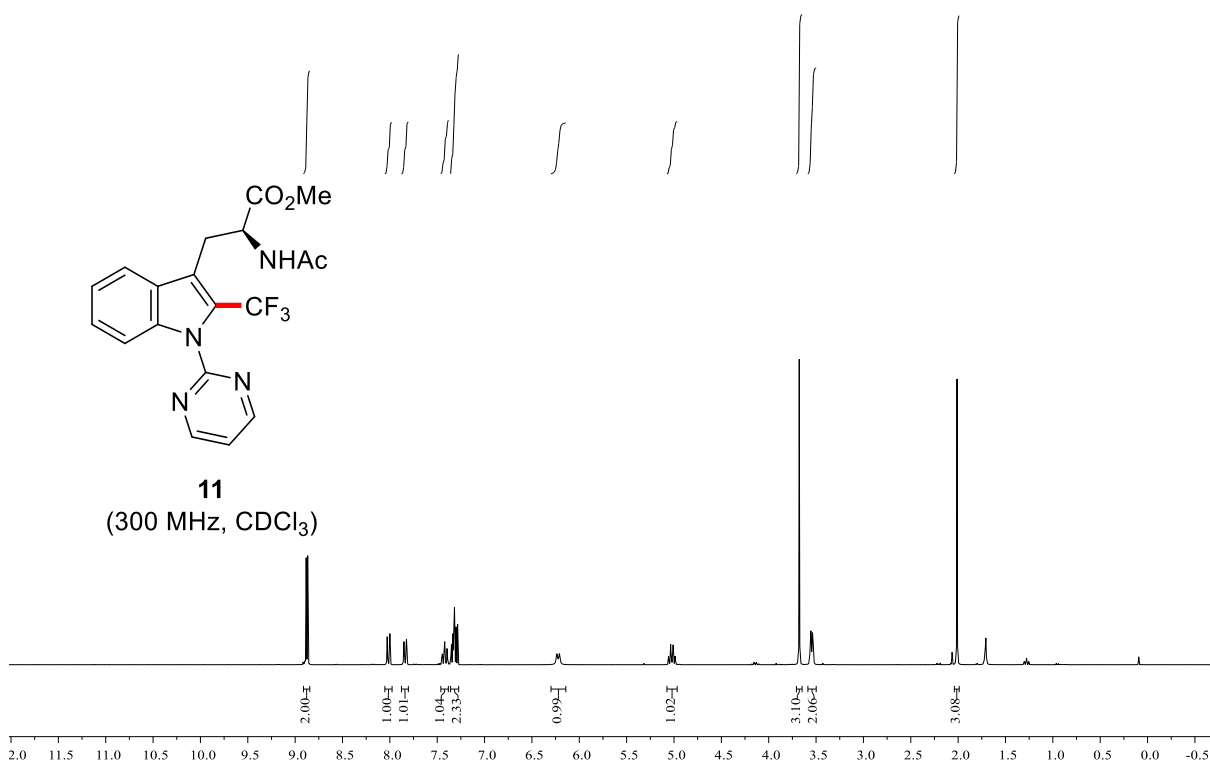

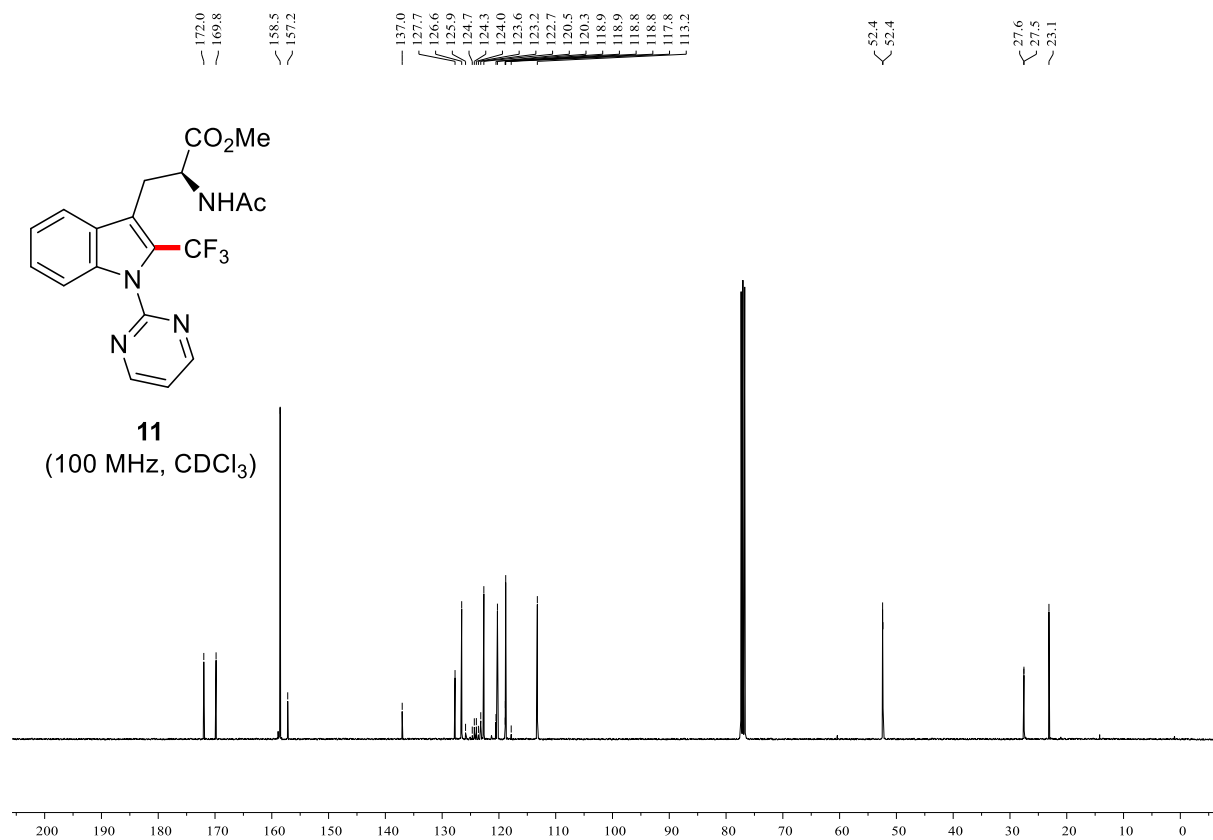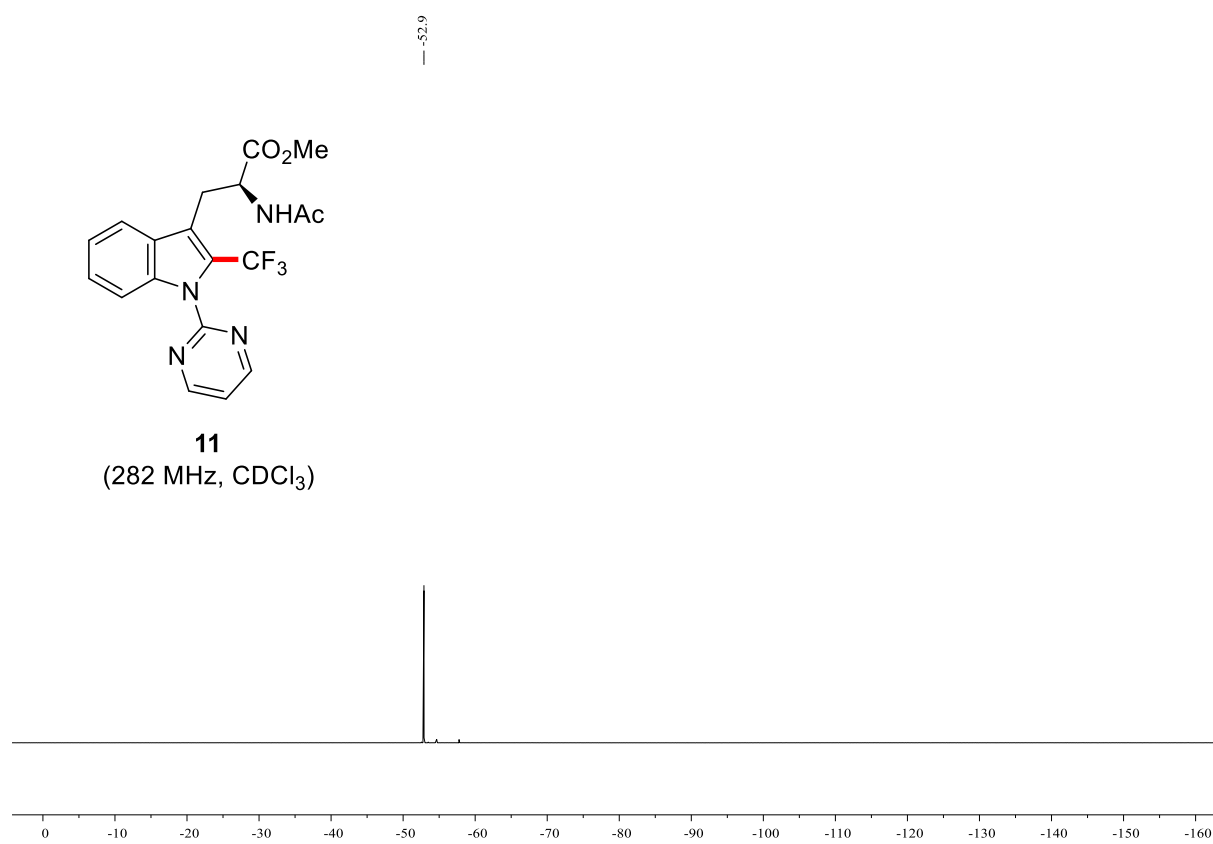

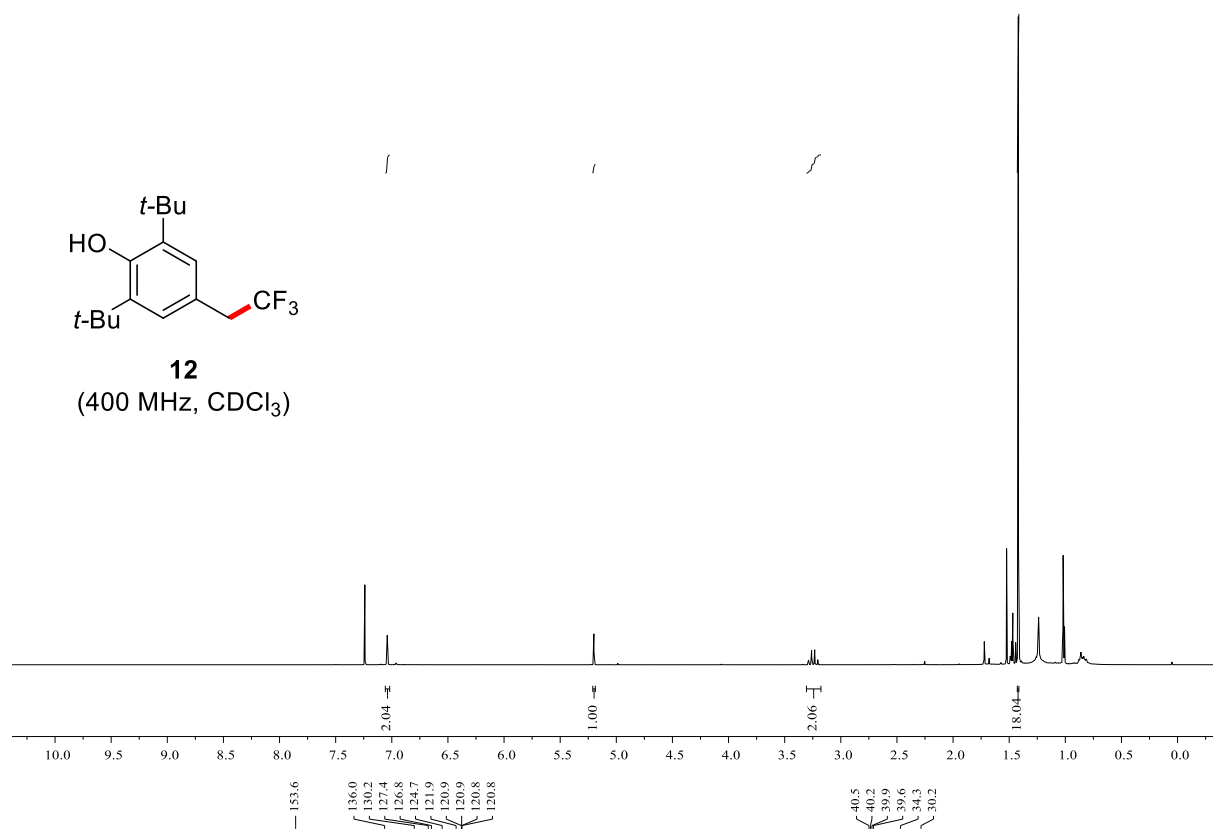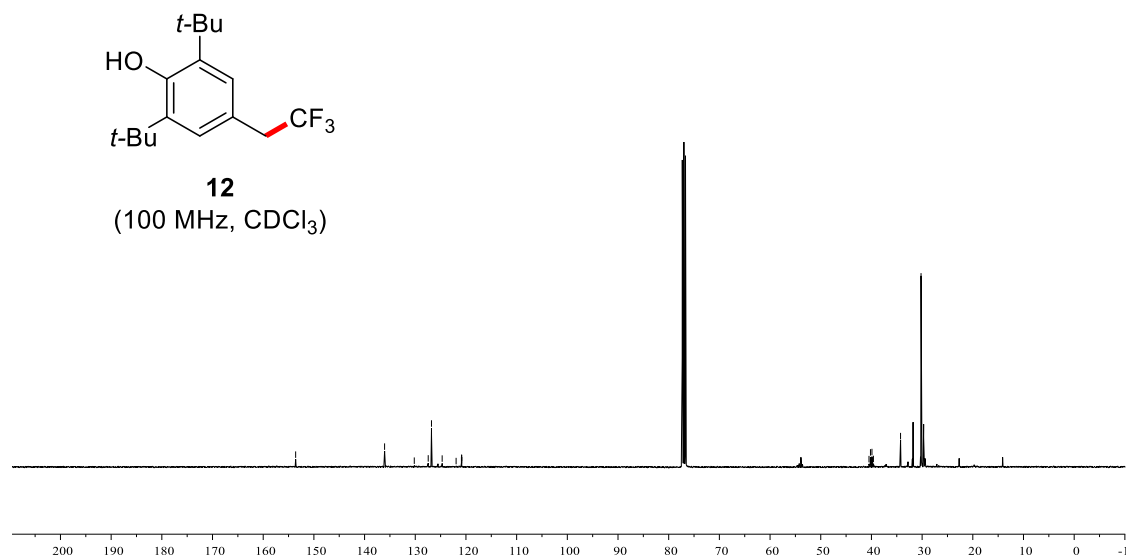

-66.2

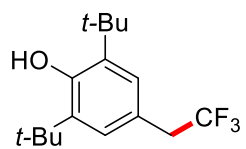

**12**  
(376 MHz, CDCl<sub>3</sub>)

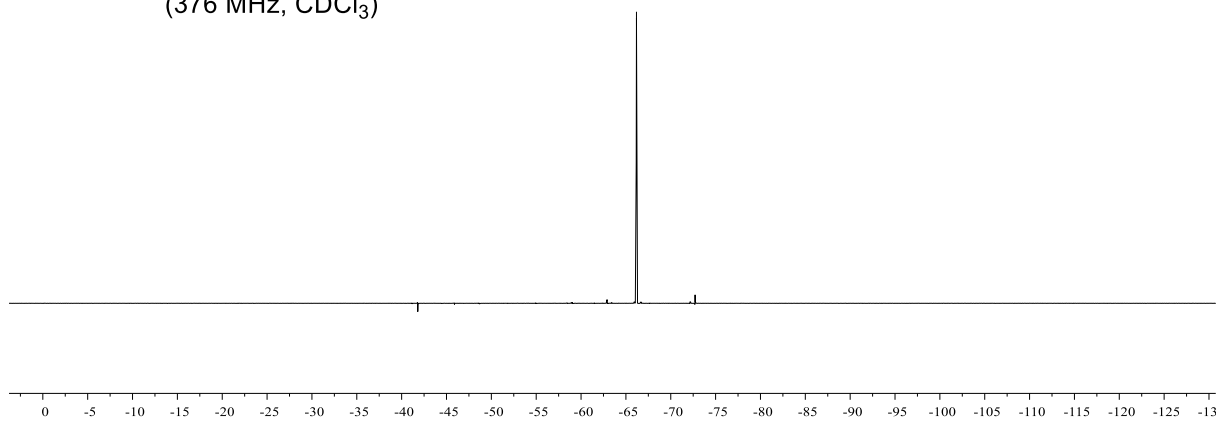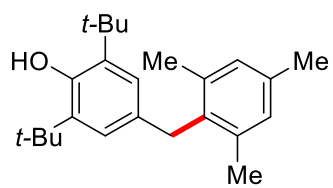

**13**  
(400 MHz, CDCl<sub>3</sub>)

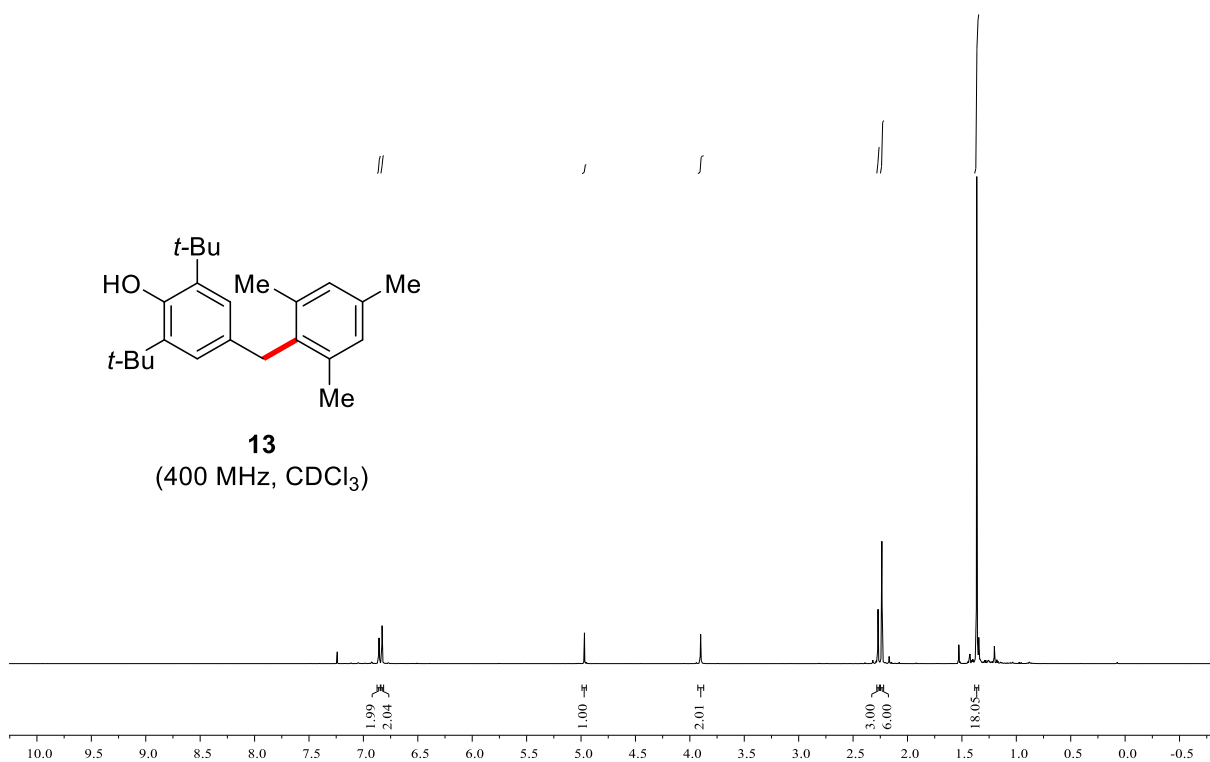

151.6  
136.8  
135.5  
135.2  
134.6  
130.5  
128.8  
124.4

34.5  
34.2  
30.3  
20.9  
20.2

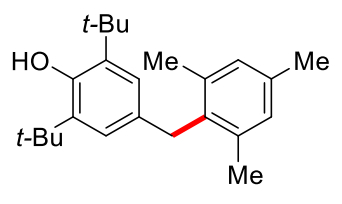

**13**  
(100 MHz, CDCl<sub>3</sub>)

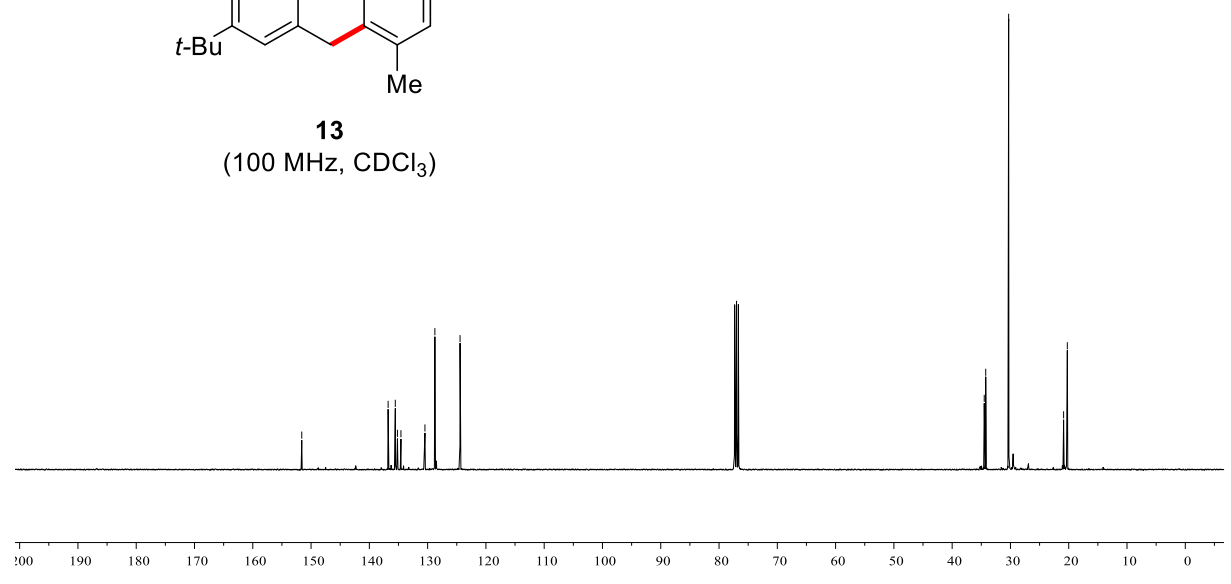

Supplement: CHEM-26-3241-s001.pdf [file CHEM-26-3241-s001.pdf]
